# Supplementary material for: Childbirth, morbidity, sickness absence and disability pension: a population-based longitudinal cohort study in Sweden
Source: PubMed Central journal article supplement — BMJ Open. 2020 Nov 24;10(11):e037726. doi: 10.1136/bmjopen-2020-037726 (PMC7689079; doi:10.1136/bmjopen-2020-037726), 2020-11-24
Supplement: bmjopen-2020-037726.draft_revisions.pdf [file bmjopen-2020-037726.draft_revisions.pdf]

# BMJ Open

BMJ Open is committed to open peer review. As part of this commitment we make the peer review history of every article we publish publicly available.

When an article is published we post the peer reviewers' comments and the authors' responses online. We also post the versions of the paper that were used during peer review. These are the versions that the peer review comments apply to.

The versions of the paper that follow are the versions that were submitted during the peer review process. They are not the versions of record or the final published versions. They should not be cited or distributed as the published version of this manuscript.

BMJ Open is an open access journal and the full, final, typeset and author-corrected version of record of the manuscript is available on our site with no access controls, subscription charges or pay-per-view fees (<http://bmjopen.bmj.com>).

If you have any questions on BMJ Open's open peer review process please email [info.bmjopen@bmj.com](mailto:info.bmjopen@bmj.com)

# BMJ Open

## Childbirth, morbidity, sickness absence, and disability pension: a population-based longitudinal cohort study in Sweden

|                               |                                                                                                                                                                                                                                                                                                                                            |
|-------------------------------|--------------------------------------------------------------------------------------------------------------------------------------------------------------------------------------------------------------------------------------------------------------------------------------------------------------------------------------------|
| Journal:                      | <i>BMJ Open</i>                                                                                                                                                                                                                                                                                                                            |
| Manuscript ID                 | bmjopen-2020-037726                                                                                                                                                                                                                                                                                                                        |
| Article Type:                 | Original research                                                                                                                                                                                                                                                                                                                          |
| Date Submitted by the Author: | 13-Feb-2020                                                                                                                                                                                                                                                                                                                                |
| Complete List of Authors:     | Wang, Mo; Karolinska Institute, Laszlo, Krisztina; Karolinska Institute Svedberg, Pia; Karolinska Institute, Department of Clinical Neuroscience Nylén, Lotta; Karolinska Institutet, Department of Public Health Sciences, Division of Social Medicine Alexanderson, Kristina; Karolinska Institutet, Department of Clinical Neuroscience |
| Keywords:                     | REPRODUCTIVE MEDICINE, PUBLIC HEALTH, EPIDEMIOLOGY                                                                                                                                                                                                                                                                                         |
|                               |                                                                                                                                                                                                                                                                                                                                            |

SCHOLARONE™  
Manuscripts

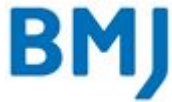

I, the Submitting Author has the right to grant and does grant on behalf of all authors of the Work (as defined in the below author licence), an exclusive licence and/or a non-exclusive licence for contributions from authors who are: i) UK Crown employees; ii) where BMJ has agreed a CC-BY licence shall apply, and/or iii) in accordance with the terms applicable for US Federal Government officers or employees acting as part of their official duties; on a worldwide, perpetual, irrevocable, royalty-free basis to BMJ Publishing Group Ltd ("BMJ") its licensees and where the relevant Journal is co-owned by BMJ to the co-owners of the Journal, to publish the Work in this journal and any other BMJ products and to exploit all rights, as set out in our [licence](#).

The Submitting Author accepts and understands that any supply made under these terms is made by BMJ to the Submitting Author unless you are acting as an employee on behalf of your employer or a postgraduate student of an affiliated institution which is paying any applicable article publishing charge ("APC") for Open Access articles. Where the Submitting Author wishes to make the Work available on an Open Access basis (and intends to pay the relevant APC), the terms of reuse of such Open Access shall be governed by a Creative Commons licence – details of these licences and which [Creative Commons](#) licence will apply to this Work are set out in our licence referred to above.

Other than as permitted in any relevant BMJ Author's Self Archiving Policies, I confirm this Work has not been accepted for publication elsewhere, is not being considered for publication elsewhere and does not duplicate material already published. I confirm all authors consent to publication of this Work and authorise the granting of this licence.

1  
2  
3 **Childbirth, morbidity, sickness absence, and disability pension: a**  
4  
5  
6 **population-based longitudinal cohort study in Sweden**  
7  
8  
9  
10  
11  
12  
13  
14  
15

16 Mo Wang<sup>1</sup>, Krisztina D. László<sup>1,2</sup>, Pia Svedberg<sup>1</sup>, Lotta Nylén<sup>1,2,3</sup>, Kristina Alexanderson<sup>1</sup>  
17  
18  
19  
20  
21

22 <sup>1</sup> Division of Insurance Medicine, Department of Clinical Neuroscience, Karolinska Institutet,  
23 Stockholm, Sweden  
24  
25

26 <sup>2</sup> Department of Global Public Health, Karolinska Institutet, Stockholm, Sweden  
27  
28

29 <sup>3</sup> Academic Primary Healthcare Centre, Stockholm Region, Stockholm, Sweden  
30  
31  
32  
33  
34  
35

36 Correspondence to: Krisztina László  
37

38 Division of Insurance Medicine, Department of Clinical Neuroscience, Karolinska Institutet,  
39 SE-171 77 Stockholm, Sweden  
40  
41

42 E-mail: [krisztina.laszlo@ki.se](mailto:krisztina.laszlo@ki.se); Telephone: +46730209761.  
43  
44  
45  
46  
47  
48  
49

50 Word count for the text: 3263  
51  
52  
53  
54  
55  
56  
57  
58  
59  
60

**ABSTRACT**

**Objective** Studies suggest that childbirth is associated with future sickness absence (SA) and disability pension (DP). Knowledge regarding the role of morbidity in these associations is very limited, but often questioned if exists. We studied the association of morbidity and SA and DP in year 2 and 3 after childbirth (or inclusion year) among women with no, one, or several childbirths.

**Design** Register-based cohort study.

**Setting** Sweden.

**Participants** Women aged 18-39 years and living in Sweden on 31 December 2004 (n=492,504).

**Primary and secondary outcome measures** Annual mean SA>14 and DP days.

**Methods** Women were categorised as no childbirth in 2005 nor during follow-up, first childbirth in 2005, and first childbirth in 2005 and at least one more birth within three years. Microdata for three years before and three years after inclusion was obtained regarding SA, DP, and morbidity (i.e., hospitalisation and specialised outpatient healthcare, excluding healthcare for pregnancy, childbirth, and the postpartum period). Hazard ratios and 95% confidence intervals for SA and DP in year 2 and 3 after childbirth were estimated by Cox regression.

**Results** Women with one childbirth had a lower risk of SA and DP than those who remained nulliparous, while women with more than one childbirth had the lowest DP risk. Morbidity after delivery or 2 July 2005 in the B0 group that was not related to pregnancy, childbirth, or the postpartum period was associated with a higher risk of future SA and DP, regardless of childbirth. Furthermore, morbidity both before and after childbirth showed a strong association with SA and DP (range of hazard ratios: 2.54-13.12).

1  
2  
3 **Conclusions** We found a strong positive association between morbidity and both SA and DP  
4  
5 among women, regardless of childbirth status. Those who gave birth had lower future SA and  
6  
7 DP risk than those who did not give birth.  
8  
9

10  
11  
12  
13 **Keywords:** sick leave, disability pension, morbidity, cohort study, childbirth, pregnancy  
14  
15  
16  
17  
18  
19  
20  
21  
22  
23  
24  
25  
26  
27  
28  
29  
30  
31  
32  
33  
34  
35  
36  
37  
38  
39  
40  
41  
42  
43  
44  
45  
46  
47  
48  
49  
50  
51  
52  
53  
54  
55  
56  
57  
58  
59  
60

For peer review only

**Strengths and limitations of this study**

- Since the study was based on nationwide population-based registers, all women fulfilling our inclusion criteria could be included, not only a sample.
- The large cohort allowed us to perform sub-group analyses and yielded high statistical precision.
- The fact that the study was conducted in Sweden, a country characterised by high employment rate among women, limits health selection into paid work.
- We could not include information on sickness absence shorter than 15 days.

## BACKGROUND

A substantial proportion of women suffer from physical and mental distress during pregnancy, delivery, and the postpartum period [1]. Common pregnancy-related symptoms and disorders include fatigue, headache, bowel problems, sleep-related problems, depression, urinary incontinence, back pain, and pelvic pain [2-4]. While most of these pregnancy-related symptoms are temporary, some more severe disorders in pregnancy or postpartum, e.g., hypertension, diabetes, and depression, may be associated with severe disorders several years later [5-8].

The pregnancy-related physical and mental disorders can also lead to temporary and permanent work incapacity in terms of sickness absence (SA) and disability pension (DP). Some studies have found a higher risk of future SA among women after childbirth, as compared to the child's father [9-11]. However, in our previous studies we found that nulliparous women have higher rates of SA/DP than those who give birth and that those having more than one childbirth have the lowest SA/DP levels 3-10 years after the childbirth [12-15]. It is, thus, of interest to study to what extent morbidity in these groups of women is associated with SA. We previously studied this in a cohort of Swedish twin sisters and found strong positive associations with morbidity, measured in terms of hospitalisation [16-18]. This may not seem surprising, however, this association is sometimes questioned and it is argued that women may prefer to be on SA, even in the absence of a limiting condition, in order to meet demands related to domestic work [19 20]. Moreover, SA and DP are not good measures of morbidity in a population: most people with different types of morbidity are not on SA or DP, as their morbidity does not limit their function regarding the work capacities required in their job to such an extent that they require SA/DP [9 22 23]. Nevertheless, knowledge on the link between morbidity and SA also in the general population is limited [21 24-29].



1  
2  
3 The aim of this study was to investigate in a nationwide population-based cohort the  
4 associations of morbidity, assessed in terms of hospitalisation and specialised outpatient care,  
5 with subsequent SA and DP among nulliparous women with no, one, or several childbirths  
6 during follow-up.  
7  
8  
9  
10  
11  
12  
13  
14  
15

## 16 **METHODS**

17  
18 This longitudinal population-based cohort study was based on nationwide register microdata,  
19 linked by the unique personal identity number assigned to all residents in Sweden.  
20  
21

22 Anonymised data from the following six such registers, kept by the following three  
23 authorities, were used:  
24  
25  
26

27  
28 - From Statistics Sweden: The Longitudinal Integration Database for Health Insurance and  
29 Labour Market Studies (LISA) regarding information on sociodemographics and year of  
30 migration.  
31  
32

33  
34 - From the National Board of Health and Welfare: 1) The Medical Birth Register to obtain  
35 information on date of deliveries and parity. It covers 97-99% of all births in Sweden since  
36 1973; 2) The National In-Patient Register (established in 1964 and nationwide since 1987) to  
37 obtain information on childbirths not included in the Medical Birth Register and information  
38 on hospitalisations due to other causes (date and diagnoses). If a delivery appeared in both  
39 registers, the information from the Medical Birth Register was used; 3) The National Out-  
40 Patient Register (established in 2001) for information on specialised outpatient healthcare  
41 (date and diagnoses); 4) The Causes of Death Register for date of death.  
42  
43  
44  
45  
46  
47  
48  
49  
50  
51  
52

53 - From the Swedish Social Insurance Agency, information from the Micro-data for Analyses  
54 of Social Insurance (MiDAS) Register, on SA >14 days and DP (dates and extent) for the  
55 period 2002-2008.  
56  
57  
58  
59  
60

## Study population

All women aged 18-39 years who had not given birth prior to 1 January 2005 and who lived in Sweden during the period 2002-2004 were included. They were categorised according to whether they gave birth in 2005 and during the follow-up for three years ( $Y_{+1}$ - $Y_{+3}$ ), from date of delivery ( $T_0$ ). As the outcomes (SA and DP) might be influenced by a new pregnancy, all women were followed up also for 43 weeks after  $Y_{+3}$ .

The women were categorised into three groups, according to future childbirth:

- **B0**: Women having no childbirth registered during follow-up ( $Y_{+1}$ - $Y_{+3}$ ) nor during the subsequent 43 weeks.
- **B1**: Women having their first childbirth in 2005 and no more births during follow-up ( $Y_{+1}$ - $Y_{+3}$ ) or the subsequent 43 weeks.
- **B1+**: Women having their first childbirth in 2005 and at least one more birth during follow-up ( $Y_{+1}$ - $Y_{+3}$ ) or the subsequent 43 weeks.

Childbirth in the Patient Register was defined by main or secondary diagnoses according to the International Classification of Disease (ICD-10)[30]: O80-84 delivery, O75.7 vaginal delivery following previous caesarean section, O75.8 other specified complications of labour and delivery, and O75.9 complication of labour and delivery, unspecified.

For the women in B1 and B1+, the date of birth was used for  $T_0$ , for the women in B0,  $T_0$  was set to 2 July 2005.

The final cohort included 492,504 women.

## Morbidity

1  
2  
3 We used information on healthcare to operationalise morbidity; we calculated the mean  
4 number of hospitalisation days and of specialised outpatient visits per year during the three  
5 years prior to and the three years after  $T_0$ .  
6  
7  
8  
9

10 In order to investigate if morbidity in terms of hospitalisation and specialised outpatient  
11 healthcare in the year after  $T_0$  increased the risk of future SA and DP, we created a variable  
12 for morbidity during  $Y_{+1}$ , excluding diagnoses related to pregnancy, childbirth, and the  
13 postpartum period (ICD-10: O00-O99 pregnancy, childbirth and the puerperium, and Z30-  
14 Z39 health services in circumstances related to reproduction).  
15  
16  
17  
18  
19  
20  
21  
22

23 In order to examine if morbidity in terms of hospitalisation and specialised outpatient  
24 healthcare prior to and/or after childbirth increased the risk of future SA and DP, we created  
25 variables, indicating morbidity 1-3 years before  $T_0$  ( $Y_{-3}$  -  $Y_{-1}$ ), and/or 1 year after  $T_0$  ( $Y_{+1}$ )  
26 (excluding diagnoses related to pregnancy, childbirth and the postpartum period (ICD-10:  
27 O00-O99 and Z30-Z39)).  
28  
29  
30  
31  
32  
33  
34  
35  
36  
37

### 38 **The Swedish sickness absence insurance system**

39  
40 All residents in Sweden aged 16 or older with income from work or unemployment benefits  
41 can claim SA benefits in case of reduced work capacity due to disease or injury. For  
42 employees, this is paid by the employer during the first 14 days, and thereafter by the Social  
43 Insurance Agency [9]. All residents aged 19-65 can be granted DP if their work capacity is  
44 long-term or permanently reduced due to disease or injury. The SA benefits cover 80%, DP  
45 covers up to 65%, of the lost income up to a certain level. Both SA and DP can be granted for  
46 full- or part-time (25%, 50%, or 75%) of ordinary work hours. This means that people can be  
47 on part-time SA and DP at the same time. Therefore, we calculated net days, e.g., two days of  
48 50% of SA or DP represent one net day.  
49  
50  
51  
52  
53  
54  
55  
56  
57  
58  
59  
60

1  
2  
3 All pregnant women can choose to take out parental benefit 60 days before the estimated  
4 delivery date. Parental benefit is granted for 480 days for one child. For 390 of these days, the  
5 benefit is based on the income, while for the remaining 90 days, the benefit is set to 180 SEK  
6 (around 18 Euro) per day.  
7  
8  
9  
10  
11  
12  
13  
14

## 15 Outcomes

16  
17 We used the following measures of sickness absence (SA) and disability pension (DP) as  
18 outcomes:  
19  
20  
21

- 22 • The mean numbers of SA and DP net days/year were calculated for each of the six  
23 years  $Y_{-3}$  -  $Y_{+3}$ .
  - 24 • General SA - the first SA spell regardless of duration in year 2-3 after childbirth ( $Y_{+2}$  -  
25  $Y_{+3}$ ).
  - 26 • Long-term SA - the first SA spell of >90 net days in  $Y_{+2}$  -  $Y_{+3}$ .
  - 27 • DP - the first new DP spell in  $Y_{+2}$  -  $Y_{+3}$ .
- 28  
29  
30  
31  
32  
33  
34  
35  
36  
37  
38  
39  
40

## 41 Included factors

42 We included *age* (18-24, 25-29, 30-34, and 35-39 years), *educational level* (elementary ( $\leq 9$   
43 years + missing), high school (10-12 years), and university/college ( $>12$  years)) in December  
44 2004 and previous *hospitalisation and specialised outpatient healthcare* 1-3 years before  $T_0$   
45 ( $Y_{-1}$  -  $Y_{-3}$ ) as covariates.  
46  
47  
48  
49  
50  
51  
52  
53  
54  
55  
56  
57  
58  
59  
60

## Statistical analyses

We performed Cox proportional hazards regression models to investigate the association between childbirth, morbidity and the risks of SA and DP. Hazard ratios (HR) and 95% confidence intervals (CI) for SA and DP were calculated. We tested the assumption of proportional hazards with log negative log curves; there was no indication for non-proportionality. Women with DP before  $T_0$  were excluded from regression analyses of future DP (n=21,848) since they were not at risk of experiencing this outcome. Follow-up started at the beginning of  $Y_{+2}$  and ended upon the event, emigration, death, or the end of  $Y_{+3}$ , or at 31 December 2008, whichever came first. When performing analyses with SA as the outcome, we censored also for DP since persons with DP are not at risk for SA. We performed crude models and models adjusted for age, educational level, and hospitalisation and specialised outpatient healthcare previous to  $T_0$ . Analyses were also performed among parous women only (B1 and B1+; n=38,413) in order to examine the potential differences between women with one childbirth and women who gave birth more than once. All analyses were conducted by SAS Statistical Software, version 9.4.

## Patient and public involvement

The study participants or the general public were not involved in decisions about the research question, the design of the study, the outcomes, the conduct of the study, the drafting of the paper, nor in the dissemination of the study results.

## RESULTS

Among the 492,504 women, 38,972 (7.9%) had at least one childbirth during the study period (B1 and B1+) (Table 1). Among those who gave birth, the majority were below 30 years and had a somewhat higher educational level than those in the B0 group (no childbirth). Regarding morbidity, when excluding specialized healthcare for pregnancy and childbirth, the proportion of women who had morbidity before and/or after  $T_0$  was similar in the three childbirth groups. Furthermore, a higher proportion of the women who gave birth had had at least one SA spell before and/or after  $T_0$  (delivery date) than women who did not. On the contrary, a higher proportion of the B0 women had DP compared to women with childbirth.

**Table 1.** Characteristics of the cohort of women<sup>1</sup> by childbirth group (N=492,504)

| Factors                                          | B0 (n=453,532) | B1 (n=14,299) | B1+ (n=23,673) |
|--------------------------------------------------|----------------|---------------|----------------|
|                                                  | n (%)          | n (%)         | n (%)          |
| <b>Age in 2004</b>                               |                |               |                |
| 18-24                                            | 257,219 (56.7) | 3688 (25.8)   | 5284 (21.4)    |
| 25-29                                            | 92,672 (20.4)  | 4593 (32.1)   | 10,354 (42.0)  |
| 30-34                                            | 56,233 (12.4)  | 4089 (28.6)   | 7614 (30.9)    |
| 35-39                                            | 47,408 (10.5)  | 1929 (13.5)   | 1421 (5.8)     |
| <b>Country of birth</b>                          |                |               |                |
| Sweden                                           | 397,091 (87.6) | 12,388 (86.6) | 22,583 (91.5)  |
| Other Northern European                          | 4873 (1.1)     | 200 (1.4)     | 237 (1.0)      |
| Other European countries                         | 7432 (1.6)     | 213 (1.5)     | 242 (1.0)      |
| Rest of the world                                | 44,136 (9.7)   | 1498 (10.5)   | 1611 (6.5)     |
| <b>Type of living area in 2004</b>               |                |               |                |
| Large cities                                     | 196,911 (43.4) | 6260 (43.8)   | 10,882 (44.1)  |
| Medium-sized cities                              | 161,919 (35.7) | 4824 (33.7)   | 8425 (34.2)    |
| Small cities                                     | 94,702 (20.9)  | 3215 (22.5)   | 5366 (21.8)    |
| <b>Educational attainment in 2004</b>            |                |               |                |
| Elementary ( $\leq 9$ years)                     | 90,510 (20.0)  | 1815 (12.7)   | 1757 (7.1)     |
| High school (10-12 years)                        | 208,184 (45.9) | 6751 (47.2)   | 9516 (38.6)    |
| University/college ( $\geq 13$ years)            | 154,838 (34.1) | 5733 (40.1)   | 13,400 (54.3)  |
| <b>Family situation in 2004</b>                  |                |               |                |
| Married or cohabitant                            | 20,295 (4.5)   | 3212 (22.5)   | 6843 (27.7)    |
| Single                                           | 433,237 (95.5) | 11,087 (77.5) | 17,830 (72.3)  |
| <b>Hospitalisation (at least one day during)</b> |                |               |                |
| 3 years prior to $T_0$ ( $Y_{-3} - Y_{-1}$ )     | 50,184 (11.1)  | 8074 (56.5)   | 13,145 (53.3)  |

|    |                                                                 |                |               |               |
|----|-----------------------------------------------------------------|----------------|---------------|---------------|
| 1  |                                                                 |                |               |               |
| 2  |                                                                 |                |               |               |
| 3  | excluding ICD-10: O and Z30-Z39                                 | 49,040 (10.8)  | 1726 (12.2)   | 2210 (9.0)    |
| 4  |                                                                 |                |               |               |
| 5  | 3 years after $T_0(Y_{+1} - Y_{+3})$                            | 49,430 (10.9)  | 13,975 (97.7) | 24,547 (99.5) |
| 6  |                                                                 |                |               |               |
| 7  | excluding ICD-10: O and Z30-Z39                                 | 47,892 (10.6)  | 1691 (11.8)   | 1924 (7.8)    |
| 8  |                                                                 |                |               |               |
| 9  | Both prior to and after $T_0(Y_{-3} - Y_{+3})$                  | 14,865 (3.3)   | 7773 (54.4)   | 13,024 (52.8) |
| 10 |                                                                 |                |               |               |
| 11 | excluding ICD-10: O and Z30-Z39                                 | 14,436 (3.2)   | 439 (3.1)     | 372 (1.5)     |
| 12 |                                                                 |                |               |               |
| 13 | <b>Specialised outpatient visit</b> (at least one visit during) |                |               |               |
| 14 |                                                                 |                |               |               |
| 15 | 3 years prior to $T_0(Y_{-3} - Y_{-1})$                         | 256,677 (56.6) | 12,130 (84.8) | 19,916 (80.7) |
| 16 |                                                                 |                |               |               |
| 17 | excluding ICD-10: O and Z30-Z39                                 | 254,531 (56.1) | 10,286 (71.9) | 16,323 (66.2) |
| 18 |                                                                 |                |               |               |
| 19 | 3 years after $T_0(Y_{+1} - Y_{+3})$                            | 264,932 (58.4) | 9870 (69.0)   | 19,625 (79.5) |
| 20 |                                                                 |                |               |               |
| 21 | excluding ICD-10: O and Z30-Z39                                 | 261,766 (57.7) | 9063 (63.4)   | 15,489 (62.8) |
| 22 |                                                                 |                |               |               |
| 23 | Both prior to and after $T_0(Y_{-3} - Y_{+3})$                  | 180,667 (39.8) | 8737 (61.1)   | 16,520 (67.0) |
| 24 |                                                                 |                |               |               |
| 25 | excluding ICD-10: O and Z30-Z39                                 | 177,748 (39.2) | 7165 (50.1)   | 11,376 (46.1) |
| 26 |                                                                 |                |               |               |
| 27 | <b>Sickness absence (SA)</b> (at least one SA spell during)     |                |               |               |
| 28 |                                                                 |                |               |               |
| 29 | 3 years prior to $T_0(Y_{-3} - Y_{-1})$                         | 54,013 (11.9)  | 5840 (40.8)   | 8802 (35.7)   |
| 30 |                                                                 |                |               |               |
| 31 | 3 years after $T_0(Y_{+1} - Y_{+3})$                            | 61,341 (13.5)  | 2797 (19.6)   | 7447 (30.2)   |
| 32 |                                                                 |                |               |               |
| 33 | 3 years prior to or after $T_0(Y_{-3} - Y_{+3})$                | 90,849 (20.0)  | 6740 (47.1)   | 11,940 (48.4) |
| 34 |                                                                 |                |               |               |
| 35 | <b>Disability pension (DP)</b> (any time during)                |                |               |               |
| 36 |                                                                 |                |               |               |
| 37 | 3 years prior to $T_0(Y_{-3} - Y_{-1})$                         | 21,289 (4.7)   | 351 (2.5)     | 208 (0.8)     |
| 38 |                                                                 |                |               |               |
| 39 | 3 years after $T_0(Y_{+1} - Y_{+3})$                            | 27,453 (6.1)   | 438 (3.1)     | 238 (1.0)     |
| 40 |                                                                 |                |               |               |
| 41 | 3 years prior to or after $T_0(Y_{-3} - Y_{+3})$                | 28,121 (6.2)   | 467 (3.3)     | 256 (1.0)     |
| 42 |                                                                 |                |               |               |
| 43 |                                                                 |                |               |               |
| 44 |                                                                 |                |               |               |

<sup>1</sup>Nulliparous women aged 18-39 in December 2004 registered as residents in Sweden in 2001-2003.

B0= No childbirth in 2005 nor in the following three years + 43 weeks.

B1= First child in 2005 and no more deliveries in the following three years + 43 weeks.

B1+ = First child in 2005 and at least one more delivery in the following three years + 43 weeks.

$T_0$ = Delivery date or in the B0 group: 2 July 2005.

The mean annual number of hospitalisation days and visits to specialised outpatient healthcare is presented in Figure 1. Figures 1c and 1d show that when healthcare with diagnoses for



1  
2  
3 pregnancy and childbirth are excluded, women in the B1 and B1+ groups had lower number  
4 of hospitalisation days and specialised outpatient visits than women without childbirth (B0),  
5 particularly the women with more than one childbirth.  
6  
7  
8

9  
10 Women who had at least one childbirth had more SA days during the year before  $T_0$ ,  
11 especially in the B1 group (Figure 2). After  $T_0$ , the number of SA days for these women  
12 dropped rapidly to a lower level than for women without childbirth, that is, in that year most  
13 women had parental-leave benefits. However, in all studied years, women who did not give  
14 birth (B0) had a higher mean number of DP days/year than women who gave birth. Women in  
15 B1+ had the lowest mean number of DP days/year compared to both B0 and B1+.  
16  
17  
18  
19  
20  
21  
22  
23

24  
25 Table 2 presents crude and multivariate HR and 95% CI for the association between  
26 morbidity in  $Y_{+1}$  after  $T_0$  and future SA among all not on DP at  $T_0$ , for each of the three  
27 childbirth groups. First all three groups are compared (B0, B1, and B1+), then the two  
28 childbirth groups are compared (B1 and B1+). In the fully adjusted models, the HR of future  
29 SA was compared between the groups, using women in the B0 group with no such morbidity  
30 as reference group. In the B0 group with such morbidity the risk was around 3-fold higher in  
31  $Y_{+2}$ - $Y_{+3}$ . Actually, the women in B1, without morbidity in  $Y_{+1}$  had a lower risk of future SA  
32 compared to B0 women without such morbidity. Those in B1+, without morbidity at  $Y_{+1}$ , had  
33 a lower risk of long-term SA (>90 days) in  $Y_{+2}$ - $Y_{+3}$ , however, a higher risk for any SA.  
34  
35  
36  
37  
38  
39  
40  
41  
42  
43  
44  
45  
46  
47  
48  
49  
50  
51  
52  
53  
54  
55  
56  
57  
58  
59  
60

**Table 2.** Association between morbidity<sup>1</sup> and future sickness absence (SA) in year 2-3 after delivery ( $Y_{+2}$ - $Y_{+3}$ ) among nulliparous women who did not give birth (B0), had one birth (B1), or more than one birth (B1+) during follow-up.

| Morbidity <sup>a</sup>                                            | Crude            | Model 1 <sup>2</sup> | Model 2 <sup>3</sup> |
|-------------------------------------------------------------------|------------------|----------------------|----------------------|
| Hazard ratios (HR) and 95% confidence intervals (CI)              |                  |                      |                      |
| At least one SA spell >14 days in $Y_{+2}$ - $Y_{+3}$             |                  |                      |                      |
| <b>All women (n=470 656)<sup>4</sup></b>                          |                  |                      |                      |
| <b>No childbirth (B0)</b>                                         |                  |                      |                      |
| no morbidity                                                      | 1                | 1                    | 1                    |
| morbidity                                                         | 3.29 (3.18-3.40) | 3.24 (3.14-3.35)     | 2.56 (2.48-2.65)     |
| <b>1 childbirth (B1)</b>                                          |                  |                      |                      |
| no morbidity                                                      | 1.45 (1.38-1.52) | 1.16 (1.10-1.21)     | 0.82 (0.76-0.86)     |
| morbidity                                                         | 3.61 (3.08-4.23) | 2.93 (2.50-3.43)     | 1.89 (1.61-2.22)     |
| <b>+ 1 childbirth (B1+)</b>                                       |                  |                      |                      |
| no morbidity                                                      | 3.01 (2.93-3.09) | 2.54 (2.47-2.61)     | 1.85 (1.79-1.90)     |
| morbidity                                                         | 5.95 (5.23-6.77) | 5.09 (4.47-5.78)     | 3.37 (2.96-3.84)     |
| <b>Women who had at least one childbirth (n=38,413)</b>           |                  |                      |                      |
| <b>1 childbirth (B1)</b>                                          |                  |                      |                      |
| no morbidity                                                      | 1                | 1                    | 1                    |
| morbidity                                                         | 2.54 (2.15-3.00) | 2.52 (2.14-2.97)     | 2.38 (2.02-2.81)     |
| <b>+ 1 childbirth (B1+)</b>                                       |                  |                      |                      |
| no morbidity                                                      | 2.10 (2.00-2.22) | 2.18 (2.06-2.29)     | 2.21 (2.10-2.33)     |
| morbidity                                                         | 4.26 (3.72-4.89) | 4.38 (3.82-5.03)     | 4.18 (3.64-4.79)     |
| At least one long-term SA spell (>90 days) in $Y_{+2}$ - $Y_{+3}$ |                  |                      |                      |
| <b>All women (n=470,656)<sup>4</sup></b>                          |                  |                      |                      |
| <b>No childbirth (B0)</b>                                         |                  |                      |                      |
| no morbidity                                                      | 1                | 1                    | 1                    |

|    |                                                         |                  |                  |                  |
|----|---------------------------------------------------------|------------------|------------------|------------------|
| 1  |                                                         |                  |                  |                  |
| 2  |                                                         |                  |                  |                  |
| 3  | morbidity                                               | 4.61 (4.39-4.84) | 4.51 (4.30-4.74) | 3.33 (3.16-3.50) |
| 4  |                                                         |                  |                  |                  |
| 5  | <b>1 childbirth (B1)</b>                                |                  |                  |                  |
| 6  |                                                         |                  |                  |                  |
| 7  | no morbidity                                            | 1.46 (1.34-1.58) | 1.07 (0.98-1.16) | 0.69 (0.63-0.75) |
| 8  |                                                         |                  |                  |                  |
| 9  | morbidity                                               | 5.66 (4.55-7.04) | 3.44-5.33)       | 2.46 (1.98-3.07) |
| 10 |                                                         |                  |                  |                  |
| 11 | <b>+ 1 childbirth (B1+)</b>                             |                  |                  |                  |
| 12 |                                                         |                  |                  |                  |
| 13 | no morbidity                                            | 1.67 (1.58-1.78) | 1.29 (1.21-1.37) | 0.85 (0.80-0.91) |
| 14 |                                                         |                  |                  |                  |
| 15 | morbidity                                               | 4.48 (3.52-5.70) | 3.48 (2.74-4.43) | 2.07 (1.62-2.63) |
| 16 |                                                         |                  |                  |                  |
| 17 | <b>Women who had at least one childbirth (n=38,413)</b> |                  |                  |                  |
| 18 |                                                         |                  |                  |                  |
| 19 | <b>1 childbirth (B1)</b>                                |                  |                  |                  |
| 20 |                                                         |                  |                  |                  |
| 21 | no morbidity                                            | 1                | 1                | 1                |
| 22 |                                                         |                  |                  |                  |
| 23 | morbidity                                               | 3.93 (3.12-4.96) | 3.83 (3.04-4.83) | 3.54 (2.80-4.46) |
| 24 |                                                         |                  |                  |                  |
| 25 | <b>+ 1 childbirth (B1+)</b>                             |                  |                  |                  |
| 26 |                                                         |                  |                  |                  |
| 27 | no morbidity                                            | 1.15 (1.04-1.27) | 1.21 (1.09-1.33) | 1.23 (1.11-1.36) |
| 28 |                                                         |                  |                  |                  |
| 29 | morbidity                                               | 3.10 (2.41-3.99) | 3.18 (2.47-4.09) | 2.96 (2.30-3.81) |

<sup>1</sup>Morbidity 1 year ( $Y_{+1}$ ) after delivery date or equivalent ( $T_0$ ), measured by hospitalisation and specialised outpatient visit (diagnoses O00-O99 and Z30-Z39 excluded).

<sup>2</sup>Model 1: Adjusted for age and educational level.

<sup>3</sup>Model 2: Adjusted for age, educational level, and previous hospitalisation and specialised outpatient visit ( $Y_{-3}$ - $Y_{-1}$ ).

<sup>4</sup>Women on DP at baseline were excluded.

1  
2  
3 When restricting those analyses to parous women (n=38,413), those in B1+ with morbidity in  
4  
5  $Y_{+1}$  had a particularly higher risk of any SA compared to all others.  
6  
7

8 When again excluding those on DP at  $T_0$ , the HR for future DP was highest in the B0 group  
9  
10 with morbidity in  $Y_{+1}$ , using the women in B0 with no morbidity in  $Y_{+1}$  as reference (Table 3).  
11  
12

13 Regardless of morbidity, parous women, particularly those in B1+, had a lower risk of DP  
14  
15 than their nulliparous counterparts. When restricting the analyses to parous women only,  
16  
17 morbidity was associated with having DP in  $Y_{+2}$ - $Y_{+3}$ , especially in the B1 group. That is,  
18  
19 multiparity was associated with a lower risk of DP.  
20  
21  
22  
23  
24  
25  
26  
27  
28  
29  
30  
31  
32  
33  
34  
35  
36  
37  
38  
39  
40  
41  
42  
43  
44  
45  
46  
47  
48  
49  
50  
51  
52  
53  
54  
55  
56  
57  
58  
59  
60

**Table 3.** Association between morbidity and future disability pension (DP) in year 2-3 after delivery ( $Y_{+2}$ - $Y_{+3}$ ) among nulliparous women who did not give birth (B0), had one birth (B1), or more than one birth (B1+) during follow-up.

| Morbidity <sup>1</sup>                                              | Crude             | Model 1 <sup>2</sup> | Model 2 <sup>3</sup> |
|---------------------------------------------------------------------|-------------------|----------------------|----------------------|
| Hazard ratios (HR) and 95% confidence intervals (CI)                |                   |                      |                      |
| <b>Granted DP in <math>Y_{+2}</math>-<math>Y_{+3}</math></b>        |                   |                      |                      |
| <b>All women (n=470,656)<sup>4</sup></b>                            |                   |                      |                      |
| <b>No childbirth (B<sub>0</sub>)</b>                                |                   |                      |                      |
| no morbidity                                                        | 1                 | 1                    | 1                    |
| morbidity                                                           | 7.72 (7.28-8.19)  | 6.92 (6.52-7.34)     | 4.12 (3.87-4.38)     |
| <b>1 childbirth (B<sub>1</sub>)</b>                                 |                   |                      |                      |
| no morbidity                                                        | 0.52 (0.42-0.64)  | 0.41 (0.34-0.51)     | 0.20 (0.16-0.24)     |
| morbidity                                                           | 3.77 (2.55-5.59)  | 2.88 (1.94-4.26)     | 1.17 (0.79-1.74)     |
| <b>+ 1 childbirth (B<sub>1+</sub>)</b>                              |                   |                      |                      |
| no morbidity                                                        | 0.13 (0.09-0.17)  | 0.12 (0.09-0.16)     | 0.06 (0.04-0.08)     |
| morbidity                                                           | 1.20 (0.60-2.40)  | 1.04 (0.52-2.08)     | 0.44 (0.22-0.87)     |
| <b>Women who had at least one childbirth (n=38,413)<sup>4</sup></b> |                   |                      |                      |
| <b>1 childbirth (B<sub>1</sub>)</b>                                 |                   |                      |                      |
| no morbidity                                                        | 1                 | 1                    | 1                    |
| morbidity                                                           | 7.32 (4.70-11.40) | 6.30 (4.03-9.82)     | 5.71 (3.65-8.92)     |
| <b>+ 1 childbirth (B<sub>1+</sub>)</b>                              |                   |                      |                      |
| no morbidity                                                        | 0.24 (0.17-0.35)  | 0.28 (0.19-0.41)     | 0.29 (0.20-0.42)     |
| morbidity                                                           | 2.32 (1.12-4.77)  | 2.34 (1.13-4.82)     | 2.10 (1.02-4.34)     |

<sup>1</sup>Morbidity 1 year ( $Y_{+1}$ ) after delivery date or equivalent ( $T_0$ ), measured by hospitalisation and specialised outpatient visit (diagnoses O00-O99 and Z30-Z39 excluded)

<sup>2</sup>Model 1: Adjusted for age and educational level

<sup>3</sup>Model 2: Adjusted for age, educational level and previous hospitalisation and specialised outpatient visit ( $Y_{-3}$ - $Y_{-1}$ )

<sup>4</sup>Women on DP at baseline were excluded

1  
2  
3 The associations between morbidity and future SA and DP among women who gave birth  
4 were also tested using morbidity (i.e., hospitalisation and specialised outpatient healthcare)  
5 before and/or after  $T_0$  as exposure, and SA and DP in  $Y_{+(2-3)}$  as outcomes. The result showed a  
6 gradient with a particularly higher risk of future SA and DP among women with morbidity  
7 both before and after  $T_0$  (Table 4).  
8  
9  
10  
11  
12  
13  
14  
15  
16  
17  
18  
19  
20  
21  
22  
23  
24  
25  
26  
27  
28  
29  
30  
31  
32  
33  
34  
35  
36  
37  
38  
39  
40  
41  
42  
43  
44  
45  
46  
47  
48  
49  
50  
51  
52  
53  
54  
55  
56  
57  
58  
59  
60

For peer review only

**Table 4.** Associations (hazard ratios (HR) and 95% confidence intervals (CI)) between morbidity<sup>1</sup> and future sickness absence (SA) and disability pension (DP), respectively, 2-3 year (Y<sub>+2</sub>-Y<sub>+3</sub>) after delivery, among women who had at least one childbirth (n=38,413), excluding those on DP when giving birth

|                                                               | Any SA spell >14 days in Y <sub>+2</sub> -Y <sub>+3</sub> |                      | Long-term SA spell (>90 days) in Y <sub>+2</sub> -Y <sub>+3</sub> |                      |
|---------------------------------------------------------------|-----------------------------------------------------------|----------------------|-------------------------------------------------------------------|----------------------|
|                                                               | Crude                                                     | Model 1 <sup>2</sup> | Crude                                                             | Model 1 <sup>2</sup> |
| No morbidity                                                  | 1                                                         | 1                    | 1                                                                 | 1                    |
| Morbidity before <sup>3</sup> delivery                        | 1.33(1.28-1.39)                                           | 1.34(1.28-1.40)      | 1.59(1.44-1.74)                                                   | 1.57(1.42-1.72)      |
| Morbidity after <sup>3</sup> delivery                         | 1.95(1.63-2.34)                                           | 1.95(1.63-2.33)      | 3.91(2.94-5.19)                                                   | 3.81(2.87-5.06)      |
| Morbidity before <sup>3</sup> and after <sup>c</sup> delivery | 2.50(2.21-2.83)                                           | 2.54(2.24-2.88)      | 4.19(3.39-5.18)                                                   | 4.06(3.28-5.02)      |
| <b>DP in Y<sub>+2</sub>-Y<sub>+3</sub></b>                    |                                                           |                      |                                                                   |                      |
|                                                               |                                                           | Crude                | Model 1 <sup>c</sup>                                              |                      |
| No morbidity                                                  |                                                           | 1                    | 1                                                                 |                      |
| Morbidity before <sup>3</sup> delivery                        |                                                           | 2.35(1.62-3.41)      | 2.12(1.46-3.07)                                                   |                      |
| Morbidity after <sup>c</sup> delivery                         |                                                           | 11.70(5.69-24.06)    | 10.10(4.90-20.79)                                                 |                      |
| Morbidity before <sup>d</sup> and after <sup>3</sup> delivery |                                                           | 17.45(10.54-28.87)   | 13.12(7.88-21.85)                                                 |                      |

<sup>1</sup>Morbidity: measured by hospitalisation and specialised outpatient visit (diagnoses O00-O99 and Z30-Z39 excluded).

<sup>2</sup>Model 1: Adjusted for age and educational level.

<sup>3</sup>During the period 1-3 years prior to delivery (Y<sub>-3</sub>-Y<sub>-1</sub>).

<sup>4</sup>1 year after delivery (Y<sub>+1</sub>).

## DISCUSSION

In this longitudinal, population-based cohort study of 492,504 women in Sweden, we investigated the associations of morbidity (i.e., hospitalisation, specialised outpatient healthcare that is not related to pregnancy, childbirth, or postpartum) with future SA and DP in three groups of nulliparous women: those not giving birth during follow-up (B0), those having one birth (B1), and those with more than one birth (B1+). During the year before date of their first childbirth ( $T_0$ ) ( $Y_{-1}$ ), parous women had higher mean number of SA days, that is, during pregnancy. This decreased gradually during the years after  $T_0$ . On the other hand, over all the six studied years the women not giving birth (in the B0 group) had a higher number of DP days than parous women. When excluding those on disability pension at  $T_0$ , we found that morbidity was strongly associated with a higher risk of future SA and DP, regardless of childbirth status. Giving birth to at least one child was associated with a lower risk of subsequent SA/DP compared to not giving birth, and this was true particularly for DP. Analysis focusing solely on parous women showed that morbidity both before and after the first childbirth was associated with a particularly high risk of future SA and DP.

Research has repeatedly shown that women have a higher probability of having SA or DP than men [31] and pregnancy/childbirth is considered to be one of the reasons behind this difference [10 11 29 32 33]. Our results regarding that SA days increased in the year before  $T_0$ , that is, during pregnancy, as well as that the number became much lower in the year after  $T_0$  (when most are on parental leave) are in line with some previous studies [10 12 14-17 34]. The somewhat higher levels of SA in  $Y_{+3}$  could be explained by the double-burden hypothesis which suggests that the combination of paid work and parenthood may lead to worse health [35-38]. However, several other studies have suggested that multiple roles are likely to be beneficial to women's health [39-41]. In our study, the SA days/year in women giving birth decreased rapidly in the year after delivery and the higher levels of SA one year before



1  
2  
3 delivery is most likely to be related to the pregnancies. A Norwegian study also reported a  
4  
5 higher level of SA in the years after pregnancy, which disappeared after accounting for SA  
6  
7 during subsequent pregnancies [38]. Moreover, women who remained nulliparous had higher  
8  
9 levels of DP than those who gave birth. Our findings also showed higher mean number of  
10  
11 hospitalisation days among nulliparous women, indicating that there might be a health  
12  
13 selection into pregnancy.  
14  
15

16  
17 Women with morbidity that was not related to pregnancy, childbirth, and the postpartum  
18  
19 period after delivery, had an overall higher risk for future SA, regardless of childbirth status.  
20  
21 This association persisted even after adjustment for age, education, and previous morbidity.  
22  
23

24 Women with one birth (B1) had a lower risk of any SA and of long-term SA (>90 days),  
25  
26 whereas women who had more than one birth had a higher risk of any SA but a lower risk of  
27  
28 long-term SA in year 2-3 after delivery ( $Y_{+2}$ - $Y_{+3}$ ). It is likely that pregnancy during the  
29  
30 follow-up time resulted in SA for women in the B1+ group. Our finding regarding an inverse  
31  
32 association between the number of births and DP might indicate better health among the  
33  
34 women in the B1+ group than in the other two groups. These findings are also in line with  
35  
36 two Swedish prospective cohort studies of female twins [16 17]. Comparison of women who  
37  
38 gave birth to one child only to those who gave birth to several children, showed similar  
39  
40 graded associations between morbidity and future SA/DP as when we compared parous  
41  
42 women with nulliparous women.  
43  
44  
45  
46  
47

48 Morbidity both before and after delivery was the strongest risk factor for SA and DP among  
49  
50 women who gave birth. We observed a graded association between morbidity and SA/DP;  
51  
52 women with morbidity before *or* after their first childbirth had a higher risk of SA and DP,  
53  
54 whereas those with morbidity both before *and* after the first childbirth had even higher risks  
55  
56 that reveals the association of more severe morbidity and higher future SA/DP risk among  
57  
58 women who gave birth. Also this is in line with the previous studies of Swedish twin sisters  
59  
60

1  
2  
3 [16 17]. To the best of our knowledge, this is the first study to document associations between  
4 morbidity and SA/DP among women in the general population, using data on both  
5 hospitalisation and specialised outpatient healthcare as well as on number of childbirths.  
6  
7  
8  
9  
10  
11  
12

### 13 **Strengths and limitations**

14  
15  
16 Strengths of this study include the population-based longitudinal cohort study design, that all  
17 women fulfilling the inclusion criteria could be included (not only a sample) and the large  
18 cohort allowing for sub-group analyses. Other strengths are the possibility to use extensive  
19 microdata linked from several high-quality nationwide administrative registers [42 43],  
20 instead of self-reports that are limited by e.g., recall bias and drop outs. It was also an  
21 advantage that all study participants could be followed from date of birth or equivalent. The  
22 universal coverage of the Swedish public SA/DP insurance system further reduces selection  
23 bias and misclassification of the outcome. Another strength is that we used the National  
24 Patient Register to identify also the childbirths not registered in the Medical Birth Register.  
25  
26 Additionally, the high employment rates among women on the Swedish labour market  
27 minimizes bias due to health selection into paid work [44].  
28  
29  
30  
31  
32  
33  
34  
35  
36  
37  
38  
39  
40  
41  
42

43 There are, however, some limitations that should be mentioned. First, some immigrant women  
44 might only have given birth before coming to Sweden; they would consequently be  
45 inappropriately categorised as nulliparous. The Medical Birth Register has information on  
46 whether the woman had previous births, also outside of Sweden, however, not the Patient  
47 Register. To reduce such misclassification, we only included women who lived in Sweden for  
48 at least three years prior to inclusion. If there were any such misclassification it probably led  
49 to underestimation of SA and DP in the B0 group and does thus not affect our conclusions. It  
50 is important to be aware of that we studied women who gave birth, irrespective of if they  
51  
52  
53  
54  
55  
56  
57  
58  
59  
60

1  
2  
3 lived with the child or lived with other children. For instance, the child might have died or be  
4  
5 adopted, or nulliparous women might live with children they did not give birth to. Another  
6  
7 aspect is that SA spells  $\leq 14$  days were not included, something that can be seen both as a  
8  
9 limitation and a strength. The SA spells  $\leq 14$  days only account for a limited number of all SA  
10  
11 days and most of them are not verified by a physician certificate [45].  
12  
13  
14  
15  
16  
17

## 18 **Conclusions**

19  
20  
21 It has been questioned whether sickness absent women with children are actually ill or rather  
22  
23 prioritise domestic duties through claiming sick. However, this study showed a strong  
24  
25 association between morbidity and both SA and DP among women of child-bearing ages. It  
26  
27 has also been suggested that women with more children have more SA. We found the  
28  
29 opposite; women with one birth had a lower future SA and DP risk than those who did not  
30  
31 give birth, while those who gave birth more than once had the lowest risk of DP.  
32  
33  
34  
35  
36  
37  
38  
39  
40  
41  
42  
43  
44  
45  
46  
47  
48  
49  
50  
51  
52  
53  
54  
55  
56  
57  
58  
59  
60

1  
2  
3 **Contributors** MW conducted the analyses, wrote the first draft and revised the paper; KL  
4 contributed to interpretation of the findings and revised the paper; PS and KA contributed to  
5 the conception and design of the study, interpretation of the findings and revised the paper;  
6 LN contribute to the interpretation of the findings, writing and revised the paper. All authors  
7 have read and approved the final version of the manuscript.  
8  
9

10  
11  
12 **Funding** This work was supported by AFA Insurance (grant number 160318). The funder  
13 was not involved in the study design, collection or analysis of the data, interpretation of the  
14 results, writing of the paper nor in decisions about the manuscript submission.  
15  
16  
17

18  
19  
20 **Competing interests** None declared.  
21  
22

23  
24 **Patient consent for publication** Not applicable.  
25

26  
27  
28 **Ethics approval** The study was approved by the Regional Ethical Review Board of Stockholm.  
29  
30

31  
32 **Data sharing statement** No additional data available.  
33  
34  
35  
36  
37  
38  
39  
40  
41  
42  
43  
44  
45  
46  
47  
48  
49  
50  
51  
52  
53  
54  
55  
56  
57  
58  
59  
60

**REFERENCES**

1. Sedgh G, Singh S, Hussain R. Intended and unintended pregnancies worldwide in 2012 and recent trends. *Studies in family planning* 2014;**45**(3):301-14 doi: 10.1111/j.1728-4465.2014.00393.x[published Online First: Epub Date]].
2. Cheng CY, Li Q. Integrative review of research on general health status and prevalence of common physical health conditions of women after childbirth. *Women's health issues : official publication of the Jacobs Institute of Women's Health* 2008;**18**(4):267-80 doi: 10.1016/j.whi.2008.02.004[published Online First: Epub Date]].
3. Saurel-Cubizolles MJ, Romito P, Lelong N, et al. Women's health after childbirth: a longitudinal study in France and Italy. *BJOG : an international journal of obstetrics and gynaecology* 2000;**107**(10):1202-9
4. Troy NW. A comparison of fatigue and energy levels at 6 weeks and 14 to 19 months postpartum. *Clinical nursing research* 1999;**8**(2):135-52 doi: 10.1177/10547739922158205[published Online First: Epub Date]].
5. Khatun M, Clavarino AM, Callaway L, et al. Common symptoms during pregnancy to predict depression and health status 14 years post partum. *International journal of gynaecology and obstetrics: the official organ of the International Federation of Gynaecology and Obstetrics* 2009;**104**(3):214-7 doi: 10.1016/j.ijgo.2008.10.019[published Online First: Epub Date]].
6. Brown MC, Best KE, Pearce MS, et al. Cardiovascular disease risk in women with pre-eclampsia: systematic review and meta-analysis. *European journal of epidemiology* 2013;**28**(1):1-19 doi: 10.1007/s10654-013-9762-6[published Online First: Epub Date]].
7. Williams D. Pregnancy: a stress test for life. *Curr Opin Obstet Gynecol* 2003;**15**(6):465-71 doi: 10.1097/01.gco.0000103846.69273.ba[published Online First: Epub Date]].

- 1  
2  
3 8. Mannisto T, Mendola P, Vaarasmaki M, et al. Elevated blood pressure in pregnancy and  
4  
5 subsequent chronic disease risk. *Circulation* 2013;**127**(6):681-90 doi:  
6  
7 10.1161/CIRCULATIONAHA.112.128751[published Online First: Epub Date]].  
8  
9
- 10 9. Mastekaasa A. Parenthood, gender and sickness absence. *Soc Sci Med* 2000;**50**(12):1827-  
11  
12 42  
13
- 14 10. Alexanderson K, Hensing G, Carstensen J, et al. Pregnancy-related sickness absence  
15  
16 among employed women in a Swedish county. *Scandinavian journal of work,*  
17  
18 *environment & health* 1995;**21**(3):191-8  
19
- 20 11. Alexanderson K, Hensing G, Leijon M, et al. Pregnancy related sickness absence in a  
21  
22 Swedish county, 1985-87. *Journal of epidemiology and community health*  
23  
24 1994;**48**(5):464-70  
25  
26  
27
- 28 12. Narusyte J, Björkenstam E, Alexanderson K, et al. Occurrence of sickness absence and  
29  
30 disability pension in relation to childbirth: A 16-year follow-up study of 6323 Swedish  
31  
32 twins. *Scand J Public Health* 2016;**44**(1):98-105 doi:  
33  
34 10.1177/1403494815610051[published Online First: Epub Date]].  
35  
36  
37
- 38 13. Chen PS, Tan AY. Autonomic nerve activity and atrial fibrillation. *Heart rhythm* 2007;**4**(3  
39  
40 Suppl):S61-4 doi: 10.1016/j.hrthm.2006.12.006[published Online First: Epub Date]].  
41
- 42 14. Laszlo KD, Bjorkenstam C, Svedberg P, et al. Sickness absence and disability pension  
43  
44 before and after first childbirth and in nulliparous women by numerical gender  
45  
46 segregation of occupations: A Swedish population-based longitudinal cohort study.  
47  
48 *PLoS One* 2019;**14**(12):e0226198 doi: 10.1371/journal.pone.0226198[published  
49  
50 Online First: Epub Date]].  
51
- 52 15. Bjorkenstam C, Orellana C, Laszlo KD, et al. Sickness absence and disability pension  
53  
54 before and after first childbirth and in nulliparous women: longitudinal analyses of  
55  
56  
57  
58  
59  
60

- 1  
2  
3 three cohorts in Sweden. *BMJ Open* 2019;**9**(9):e031593 doi: 10.1136/bmjopen-2019-  
4 031593[published Online First: Epub Date]].  
5  
6  
7  
8 16. Björkenstam E, Alexanderson K, Narusyte J, et al. Childbirth, hospitalisation and sickness  
9 absence: a study of female twins. *BMJ Open* 2015;**5**(1):e006033 doi:  
10 10.1136/bmjopen-2014-006033[published Online First: Epub Date]].  
11  
12  
13  
14 17. Björkenstam E, Narusyte J, Alexanderson K, et al. Associations between childbirth,  
15 hospitalization and disability pension: a cohort study of female twins. *PLoS One*  
16 2014;**9**(7):e101566 doi: 10.1371/journal.pone.0101566[published Online First: Epub  
17 Date]].  
18  
19  
20  
21  
22  
23 18. Björkenstam C, Alexanderson K, Björkenstam E, et al. Diagnosis-specific disability  
24 pension and risk of all-cause and cause-specific mortality - a cohort study of 4.9  
25 million inhabitants in Sweden. *BMC public health* 2014;**14**(1):1247 doi:  
26 10.1186/1471-2458-14-1247[published Online First: Epub Date]].  
27  
28  
29  
30  
31  
32 19. Angelov NJ, Per; Lindahl Erika. Gender Differences in Sickness Absence and the Gender  
33 Division of Family Responsibilities. . IZA Discussion Paper No. 7379., 2013.  
34  
35  
36  
37 20. Svensson T, Kitlinski M, Engstrom G, et al. Psychological stress and risk of incident atrial  
38 fibrillation in men and women with known atrial fibrillation genetic risk scores.  
39 *Scientific reports* 2017;**7**:42613 doi: 10.1038/srep42613[published Online First: Epub  
40 Date]].  
41  
42  
43  
44  
45  
46 21. Alexanderson K, Norlund A. Swedish Council on Technology Assessment in Health Care  
47 (SBU). Chapter 1. Aim, background, key concepts, regulations, and current statistics.  
48 *Scandinavian journal of public health. Supplement* 2004;**63**:12-30 doi:  
49 10.1080/14034950410021808[published Online First: Epub Date]].  
50  
51  
52  
53  
54  
55  
56  
57  
58  
59  
60

- 1  
2  
3 22. Kjeldgard L, Ohlin M, Elrud R, et al. Bicycle crashes and sickness absence - a population-  
4 based Swedish register study of all individuals of working ages. BMC Public Health  
5 2019;**19**(1):943 doi: 10.1186/s12889-019-7284-1[published Online First: Epub Date]].  
6  
7  
8  
9  
10 23. Alexanderson K, Norlund A. Swedish Council on Technology Assessment in Health Care  
11 (SBU). Chapter 1. Aim, background, key concepts, regulations, and current statistics.  
12 Scandinavian Journal of Public Health 2004;**32**(Supplement 63):12-30  
13  
14  
15  
16  
17 24. Allebeck P, Mastekaasa A. Swedish Council on Technology Assessment in Health Care  
18 (SBU). Chapter 3. Causes of sickness absence: research approaches and explanatory  
19 models. Scandinavian journal of public health. Supplement 2004;**63**:36-43 doi:  
20 10.1080/14034950410021835[published Online First: Epub Date]].  
21  
22  
23  
24  
25  
26 25. Englund L, Tibblin G, Svardsudd K. Variations in sick-listing practice among male and  
27 female physicians of different specialities based on case vignettes. Scandinavian  
28 journal of primary health care 2000;**18**(1):48-52  
29  
30  
31  
32  
33 26. Sydsjo A, Sydsjo G, Kjessler B. Sick leave and social benefits during pregnancy--a  
34 Swedish-Norwegian comparison. Acta Obstet Gynecol Scand 1997;**76**(8):748-54  
35  
36  
37  
38 27. Sydsjo G, Sydsjo A. Newly delivered women's evaluation of personal health status and  
39 attitudes towards sickness absence and social benefits. Acta Obstet Gynecol Scand  
40 2002;**81**(2):104-11  
41  
42  
43  
44 28. Larsson C, Sydsjo A, Alexanderson K, et al. Obstetricians' attitudes and opinions on  
45 sickness absence and benefits during pregnancy. Acta Obstet Gynecol Scand  
46 2006;**85**(2):165-70  
47  
48  
49  
50  
51 29. Angelov N, Johansson, P. & Lindahl, E. . Sick of family responsibilities? Empirical  
52 Economics 2018 doi: doi:10.1007/s00181-018-1552-2[published Online First: Epub  
53 Date]].  
54  
55  
56  
57  
58  
59  
60



- 1  
2  
3 30. WHO. *International Statistical Classification of Diseases and Related Health Problems,*  
4  
5 *Tenth Revision (ICD-10). Chapter V (F).* Geneva: WHO, 1993.  
6  
7  
8 31. Leinonen T, Viikari-Juntura E, Husgafvel-Pursiainen K, et al. Labour Market Segregation  
9  
10 and Gender Differences in Sickness Absence: Trends in 2005-2013 in Finland. *Annals*  
11  
12 *of work exposures and health* 2018;**62**(4):438-49 doi:  
13  
14 10.1093/annweh/wxx107[published Online First: Epub Date]].  
15  
16  
17 32. Alexanderson K, Sydsjo A, Hensing G, et al. Impact of pregnancy on gender differences  
18  
19 in sickness absence. *Scandinavian Journal of Social Medicine* 1996;**24**(3):169-76  
20  
21  
22 33. Åkerlind I, Alexanderson A, Hensing G, et al. Sex Differences in Sickness Absence, in  
23  
24 relation to Parental Status. *Scandinavian journal of social medicine* 1995;**4**(1):27-35  
25  
26  
27 34. Sydsjo A, Sydsjo G, Alexanderson K. Influence of pregnancy-related diagnoses on sick-  
28  
29 leave data in women aged 16-44. *J Womens Health Gen Based Med* 2001;**10**(7):707-  
30  
31 14  
32  
33 35. Lidwall U, Marklund S, Voss M. Work-family interference and long-term sickness  
34  
35 absence: a longitudinal cohort study. *European journal of public health*  
36  
37 2010;**20**(6):676-81 doi: 10.1093/eurpub/ckp201[published Online First: Epub Date]].  
38  
39  
40 36. Vaananen A, Kevin MV, Ala-Mursula L, et al. The double burden of and negative  
41  
42 spillover between paid and domestic work: associations with health among men and  
43  
44 women. *Women & health* 2004;**40**(3):1-18  
45  
46  
47 37. Blank N, Diderichsen F. Short-term and long-term sick-leave in Sweden: relationships  
48  
49 with social circumstances, working conditions and gender. *Scandinavian journal of*  
50  
51 *social medicine* 1995;**23**(4):265-72  
52  
53  
54 38. Rieck K, Telle K. Sick leave before, during and after pregnancy. . *Acta Sociologica*  
55  
56 2013;**56**:117-37  
57  
58  
59  
60

- 1  
2  
3 39. McMunn A, Bartley M, Hardy R, et al. Life course social roles and women's health in  
4  
5 mid-life: causation or selection? *Journal of epidemiology and community health*  
6  
7 2006;**60**(6):484-9 doi: 10.1136/jech.2005.042473[published Online First: Epub Date]].  
8  
9
- 10 40. Lahelma E, Arber S, Kivela K, et al. Multiple roles and health among British and Finnish  
11  
12 women: the influence of socioeconomic circumstances. *Social science & medicine*  
13  
14 (1982) 2002;**54**(5):727-40  
15  
16
- 17 41. Fokkema T. Combining a job and children: contrasting the health of married and divorced  
18  
19 women in the Netherlands? *Social science & medicine* (1982) 2002;**54**(5):741-52  
20  
21
- 22 42. Ludvigsson JF, Andersson E, Ekblom A, et al. External review and validation of the  
23  
24 Swedish national inpatient register. *BMC Public Health* 2011;**11**:450 doi:  
25  
26 10.1186/1471-2458-11-450[published Online First: Epub Date]].  
27  
28
- 29 43. Cnattingius S, Ericson A, Gunnarskog J, et al. A quality study of a medical birth registry.  
30  
31 *Scandinavian journal of social medicine* 1990;**18**(2):143-8  
32
- 33 44. Mareš P, Světošová A, Baran P. Zaměstnání těhotné ženy ve vztahu k průběhu a  
34  
35 výsledku těhotenství (Tecknen ska vara över bokstäverna och åt andra hållet).  
36  
37 *Československá gynekologie* (Tecknet ska vara åt andra hållet) 1989;**54**(1):1-6  
38  
39
- 40 45. Hensing G, Alexanderson K, Allebeck P, et al. How to measure sickness absence?  
41  
42 Literature review and suggestion of five basic measures. *Scand J Soc Med*  
43  
44 1998;**26**(2):133-44  
45  
46  
47  
48  
49  
50  
51  
52  
53  
54  
55  
56  
57  
58  
59  
60

**FIGURE LEGENDS**

Figure 1. Mean annual number of hospitalization days and specialized outpatient visits (with 95% CI).

Figure 2. Mean annual number of days on sickness absence (SA) and/or disability pension (DP) (with 95% CI)

For peer review only

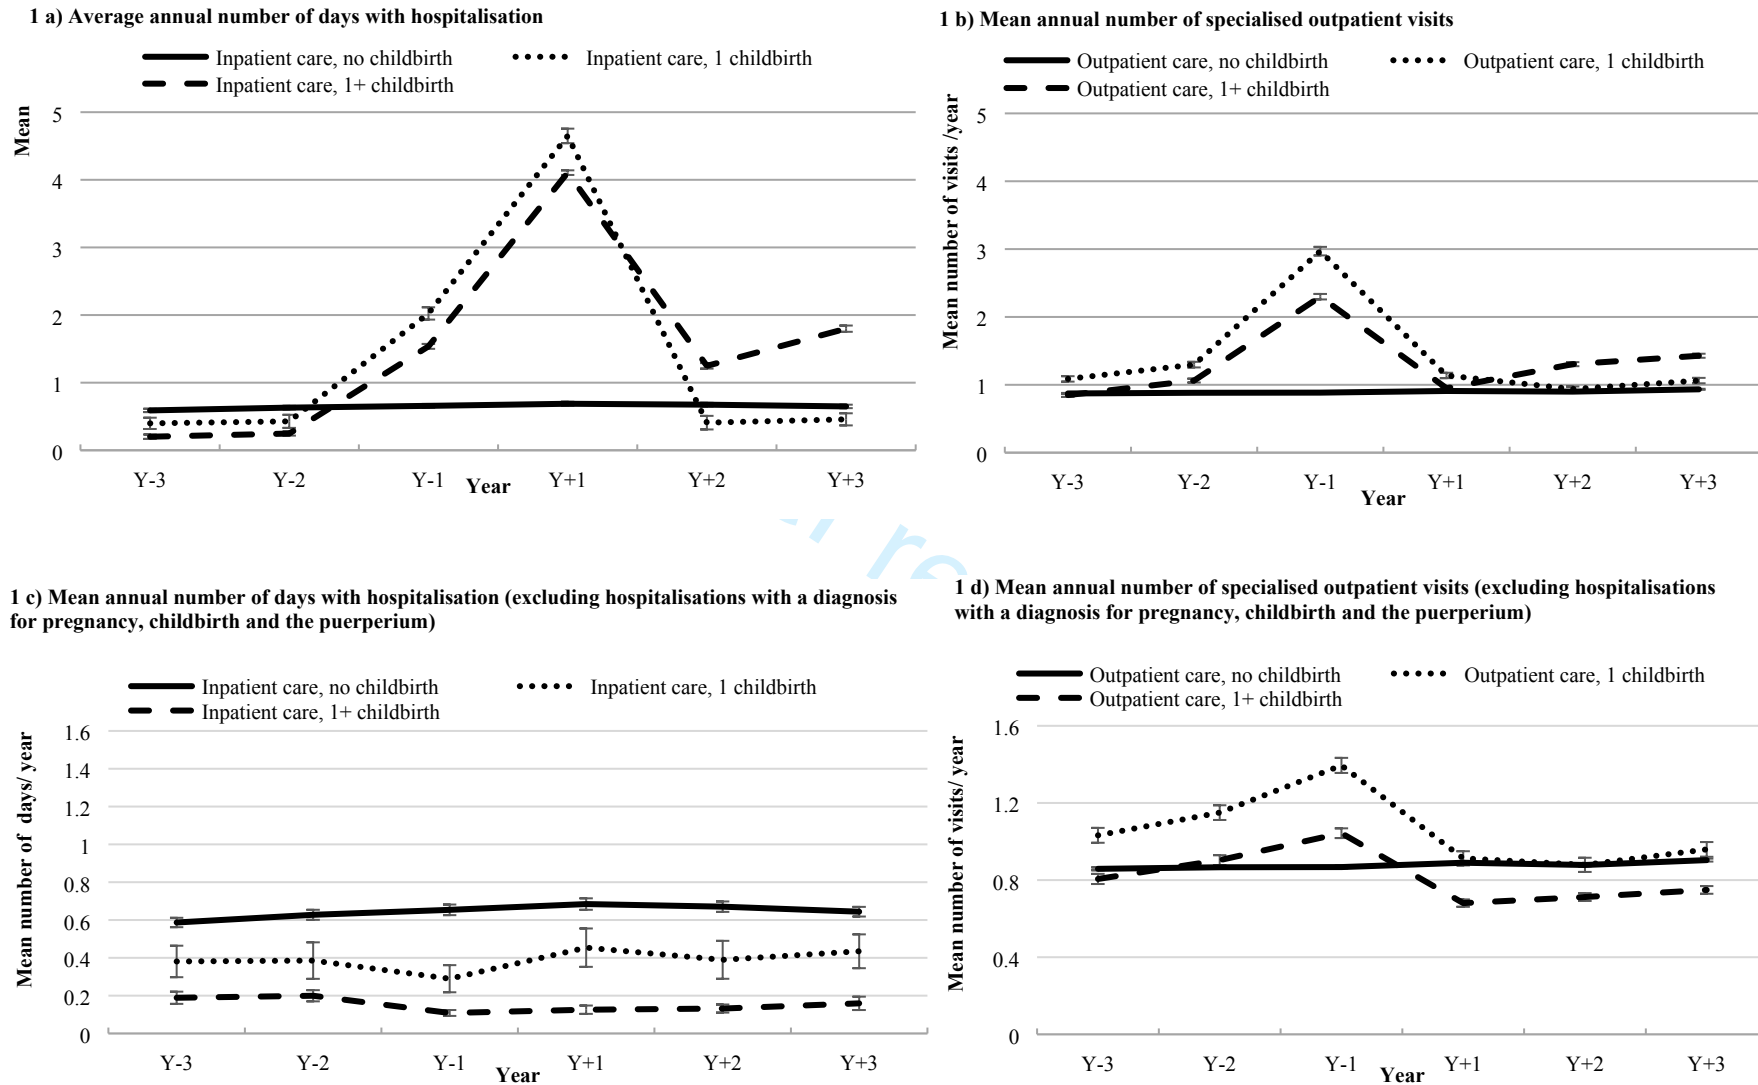

Figure 1.

2 a) Mean annual net number of days on sickness absence (SA)

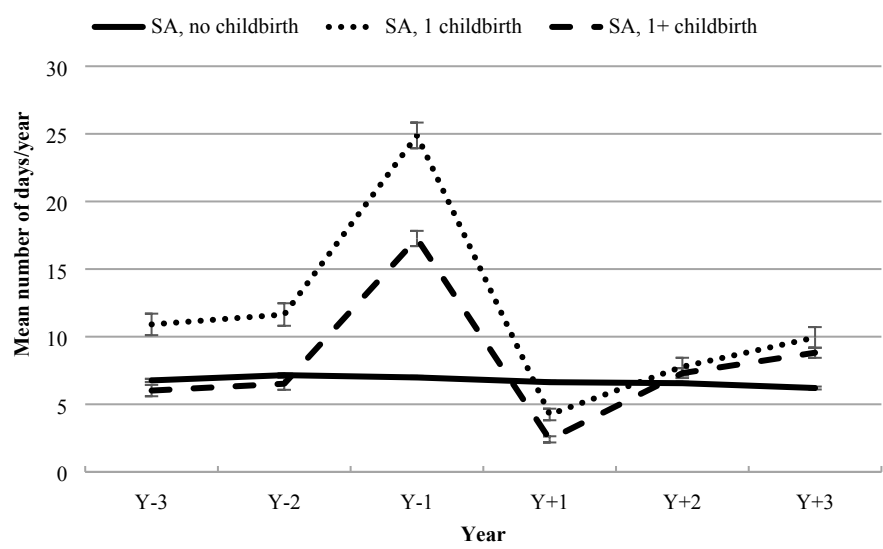

2 b) Mean annual net number of days on disability pension (DP)

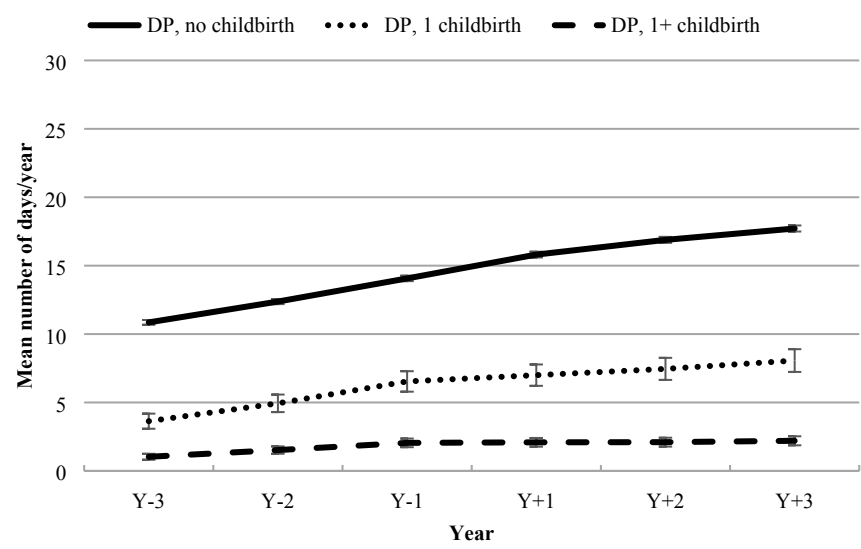

Figure 2.

view only

STROBE Statement—Checklist of items that should be included in reports of *cohort studies*

|                              | Item No | Recommendation                                                                                                                                                                                    | Page                     |
|------------------------------|---------|---------------------------------------------------------------------------------------------------------------------------------------------------------------------------------------------------|--------------------------|
| <b>Title and abstract</b>    | 1       | (a) Indicate the study's design with a commonly used term in the title or the abstract                                                                                                            | p. 1, 2                  |
|                              |         | (b) Provide in the abstract an informative and balanced summary of what was done and what was found                                                                                               | p. 2                     |
| <b>Introduction</b>          |         |                                                                                                                                                                                                   |                          |
| Background/rationale         | 2       | Explain the scientific background and rationale for the investigation being reported                                                                                                              | p. 5-6                   |
| Objectives                   | 3       | State specific objectives, including any prespecified hypotheses                                                                                                                                  | p. 6                     |
| <b>Methods</b>               |         |                                                                                                                                                                                                   |                          |
| Study design                 | 4       | Present key elements of study design early in the paper                                                                                                                                           | p. 6-7                   |
| Setting                      | 5       | Describe the setting, locations, and relevant dates, including periods of recruitment, exposure, follow-up, and data collection                                                                   | p. 6-9                   |
| Participants                 | 6       | (a) Give the eligibility criteria, and the sources and methods of selection of participants. Describe methods of follow-up                                                                        | p. 6-9                   |
|                              |         | (b) For matched studies, give matching criteria and number of exposed and unexposed                                                                                                               | -                        |
| Variables                    | 7       | Clearly define all outcomes, exposures, predictors, potential confounders, and effect modifiers. Give diagnostic criteria, if applicable                                                          | p. 7-9                   |
| Data sources/<br>measurement | 8*      | For each variable of interest, give sources of data and details of methods of assessment (measurement). Describe comparability of assessment methods if there is more than one group              | p. 7-9                   |
| Bias                         | 9       | Describe any efforts to address potential sources of bias                                                                                                                                         | p. 9, 10                 |
| Study size                   | 10      | Explain how the study size was arrived at                                                                                                                                                         | p. 7, 12-13              |
| Quantitative variables       | 11      | Explain how quantitative variables were handled in the analyses. If applicable, describe which groupings were chosen and why                                                                      | p. 9, 12-13              |
| Statistical methods          | 12      | (a) Describe all statistical methods, including those used to control for confounding                                                                                                             | p. 10                    |
|                              |         | (b) Describe any methods used to examine subgroups and interactions                                                                                                                               | p. 10                    |
|                              |         | (c) Explain how missing data were addressed                                                                                                                                                       | -                        |
|                              |         | (d) If applicable, explain how loss to follow-up was addressed                                                                                                                                    | p. 10                    |
|                              |         | (e) Describe any sensitivity analyses                                                                                                                                                             | p. 10                    |
| <b>Results</b>               |         |                                                                                                                                                                                                   |                          |
| Participants                 | 13*     | (a) Report numbers of individuals at each stage of study—eg numbers potentially eligible, examined for eligibility, confirmed eligible, included in the study, completing follow-up, and analysed | p. 7, 12-13              |
|                              |         | (b) Give reasons for non-participation at each stage                                                                                                                                              | p. 7, 12-13, 15-16       |
|                              |         | (c) Consider use of a flow diagram                                                                                                                                                                | -                        |
| Descriptive data             | 14*     | (a) Give characteristics of study participants (eg demographic, clinical, social) and information on exposures and potential confounders                                                          | p. 12-13                 |
|                              |         | (b) Indicate number of participants with missing data for each variable of interest                                                                                                               | p. 12-13                 |
|                              |         | (c) Summarise follow-up time (eg, average and total amount)                                                                                                                                       | -                        |
| Outcome data                 | 15*     | Report numbers of outcome events or summary measures over time                                                                                                                                    | p. 12-13, 15-16, 18, 20, |

Figures 1-2

|    |                          |    |                                                                                                                                                                                                              |                                   |
|----|--------------------------|----|--------------------------------------------------------------------------------------------------------------------------------------------------------------------------------------------------------------|-----------------------------------|
| 1  |                          |    |                                                                                                                                                                                                              | Figures 1-2                       |
| 2  |                          |    |                                                                                                                                                                                                              |                                   |
| 3  | Main results             | 16 | (a) Give unadjusted estimates and, if applicable, confounder-adjusted estimates and their precision (eg, 95% confidence interval). Make clear which confounders were adjusted for and why they were included | 12-13, 15-16, 18, 20, Figures 1-2 |
| 4  |                          |    | (b) Report category boundaries when continuous variables were categorized                                                                                                                                    | p. 12-13                          |
| 5  |                          |    | (c) If relevant, consider translating estimates of relative risk into absolute risk for a meaningful time period                                                                                             | -                                 |
| 6  |                          |    |                                                                                                                                                                                                              |                                   |
| 7  |                          |    |                                                                                                                                                                                                              |                                   |
| 8  | Other analyses           | 17 | Report other analyses done—eg analyses of subgroups and interactions, and sensitivity analyses                                                                                                               | p. 10-20                          |
| 9  |                          |    |                                                                                                                                                                                                              |                                   |
| 10 |                          |    |                                                                                                                                                                                                              |                                   |
| 11 |                          |    |                                                                                                                                                                                                              |                                   |
| 12 |                          |    |                                                                                                                                                                                                              |                                   |
| 13 | <b>Discussion</b>        |    |                                                                                                                                                                                                              |                                   |
| 14 | Key results              | 18 | Summarise key results with reference to study objectives                                                                                                                                                     | p. 21                             |
| 15 | Limitations              | 19 | Discuss limitations of the study, taking into account sources of potential bias or imprecision. Discuss both direction and magnitude of any potential bias                                                   | p. 23, 24                         |
| 16 |                          |    |                                                                                                                                                                                                              |                                   |
| 17 |                          |    |                                                                                                                                                                                                              |                                   |
| 18 | Interpretation           | 20 | Give a cautious overall interpretation of results considering objectives, limitations, multiplicity of analyses, results from similar studies, and other relevant evidence                                   | p. 21-24                          |
| 19 |                          |    |                                                                                                                                                                                                              |                                   |
| 20 |                          |    |                                                                                                                                                                                                              |                                   |
| 21 |                          |    |                                                                                                                                                                                                              |                                   |
| 22 | Generalisability         | 21 | Discuss the generalisability (external validity) of the study results                                                                                                                                        | p. 23, 24                         |
| 23 |                          |    |                                                                                                                                                                                                              |                                   |
| 24 | <b>Other information</b> |    |                                                                                                                                                                                                              |                                   |
| 25 | Funding                  | 22 | Give the source of funding and the role of the funders for the present study and, if applicable, for the original study on which the present article is based                                                | p. 25                             |
| 26 |                          |    |                                                                                                                                                                                                              |                                   |

\*Give information separately for exposed and unexposed groups.

**Note:** An Explanation and Elaboration article discusses each checklist item and gives methodological background and published examples of transparent reporting. The STROBE checklist is best used in conjunction with this article (freely available on the Web sites of PLoS Medicine at <http://www.plosmedicine.org/>, Annals of Internal Medicine at <http://www.annals.org/>, and Epidemiology at <http://www.epidem.com/>). Information on the STROBE Initiative is available at <http://www.strobe-statement.org>.

# BMJ Open

## Childbirth, morbidity, sickness absence, and disability pension: a population-based longitudinal cohort study in Sweden

|                                 |                                                                                                                                                                                                                                                                                                                                            |
|---------------------------------|--------------------------------------------------------------------------------------------------------------------------------------------------------------------------------------------------------------------------------------------------------------------------------------------------------------------------------------------|
| Journal:                        | <i>BMJ Open</i>                                                                                                                                                                                                                                                                                                                            |
| Manuscript ID                   | bmjopen-2020-037726.R1                                                                                                                                                                                                                                                                                                                     |
| Article Type:                   | Original research                                                                                                                                                                                                                                                                                                                          |
| Date Submitted by the Author:   | 26-May-2020                                                                                                                                                                                                                                                                                                                                |
| Complete List of Authors:       | Wang, Mo; Karolinska Institute, Laszlo, Krisztina; Karolinska Institute Svedberg, Pia; Karolinska Institute, Department of Clinical Neuroscience Nylén, Lotta; Karolinska Institutet, Department of Public Health Sciences, Division of Social Medicine Alexanderson, Kristina; Karolinska Institutet, Department of Clinical Neuroscience |
| <b>Primary Subject Heading</b>: | Public health                                                                                                                                                                                                                                                                                                                              |
| Secondary Subject Heading:      | Reproductive medicine                                                                                                                                                                                                                                                                                                                      |
| Keywords:                       | REPRODUCTIVE MEDICINE, PUBLIC HEALTH, EPIDEMIOLOGY                                                                                                                                                                                                                                                                                         |
|                                 |                                                                                                                                                                                                                                                                                                                                            |

SCHOLARONE™  
Manuscripts





I, the Submitting Author has the right to grant and does grant on behalf of all authors of the Work (as defined in the below author licence), an exclusive licence and/or a non-exclusive licence for contributions from authors who are: i) UK Crown employees; ii) where BMJ has agreed a CC-BY licence shall apply, and/or iii) in accordance with the terms applicable for US Federal Government officers or employees acting as part of their official duties; on a worldwide, perpetual, irrevocable, royalty-free basis to BMJ Publishing Group Ltd ("BMJ") its licensees and where the relevant Journal is co-owned by BMJ to the co-owners of the Journal, to publish the Work in this journal and any other BMJ products and to exploit all rights, as set out in our [licence](#).

The Submitting Author accepts and understands that any supply made under these terms is made by BMJ to the Submitting Author unless you are acting as an employee on behalf of your employer or a postgraduate student of an affiliated institution which is paying any applicable article publishing charge ("APC") for Open Access articles. Where the Submitting Author wishes to make the Work available on an Open Access basis (and intends to pay the relevant APC), the terms of reuse of such Open Access shall be governed by a Creative Commons licence – details of these licences and which [Creative Commons](#) licence will apply to this Work are set out in our licence referred to above.

Other than as permitted in any relevant BMJ Author's Self Archiving Policies, I confirm this Work has not been accepted for publication elsewhere, is not being considered for publication elsewhere and does not duplicate material already published. I confirm all authors consent to publication of this Work and authorise the granting of this licence.

1  
2  
3 **Childbirth, morbidity, sickness absence, and disability pension: a**  
4  
5  
6 **population-based longitudinal cohort study in Sweden**  
7  
8  
9  
10  
11  
12  
13  
14  
15

16 Mo Wang<sup>1</sup>, Krisztina D. László<sup>1,2</sup>, Pia Svedberg<sup>1</sup>, Lotta Nylén<sup>1,2,3</sup>, Kristina Alexanderson<sup>1</sup>  
17  
18  
19  
20  
21

22 <sup>1</sup> Division of Insurance Medicine, Department of Clinical Neuroscience, Karolinska Institutet,  
23  
24 Stockholm, Sweden  
25

26 <sup>2</sup> Department of Global Public Health, Karolinska Institutet, Stockholm, Sweden  
27

28 <sup>3</sup> Academic Primary Healthcare Centre, Stockholm Region, Stockholm, Sweden  
29  
30  
31  
32  
33  
34

35 Correspondence to: Krisztina László  
36

37 Division of Insurance Medicine, Department of Clinical Neuroscience, Karolinska Institutet,  
38  
39 SE-171 77 Stockholm, Sweden  
40  
41

42 E-mail: [krisztina.laszlo@ki.se](mailto:krisztina.laszlo@ki.se); Telephone: +46730209761.  
43  
44  
45  
46  
47  
48  
49

50 Word count for the text: 3781  
51  
52  
53  
54  
55  
56  
57  
58  
59  
60

## ABSTRACT

**Objective** To investigate associations of morbidity with subsequent sickness absence (SA) and disability pension (DP) among initially nulliparous women with no, one, or several childbirths during follow-up.

**Design** Longitudinal register-based cohort study.

**Setting** Sweden.

**Participants** Nulliparous women, aged 18-39 years and living in Sweden on 31 December 2004 and the three preceding years (n=492,504).

**Outcome measures** Annual mean DP and SA days (in SA spells >14 days) in the three years before and after inclusion date in 2005.

**Methods** Women were categorised into three groups: no childbirth in 2005 nor during the follow-up, a first childbirth in 2005, but not during follow-up, and having a first childbirth in 2005 and at least one more during follow-up. Microdata were obtained for three years before and three years after inclusion regarding SA, DP, mortality, and morbidity (i.e., hospitalisation and specialised outpatient healthcare, excluding healthcare for pregnancy, childbirth, and postpartum period). Hazard ratios and 95% confidence intervals for SA and DP in year 2 and 3 after childbirth were estimated by Cox regression; excluding those on DP at inclusion.

**Results** After controlling for study participants' prior morbidity and sociodemographic characteristics, women with one childbirth had a lower risk of SA and DP than those who remained nulliparous, while women with more than one childbirth had the lowest DP risk. Morbidity after inclusion that was not related to pregnancy, childbirth, or the postpartum period was associated with a higher risk of future SA and DP, regardless of childbirth group. Furthermore, morbidity both before and after childbirth showed a strong association with SA and DP (hazard ratio range: 2.54-13.12).

1  
2  
3 **Conclusions** We found a strong positive association between morbidity and both SA and DP  
4  
5 among women, regardless of childbirth status. Those who gave birth had lower future SA and  
6  
7 DP risk than those who did not.  
8  
9

10  
11  
12  
13 **Keywords:** sick leave, disability pension, morbidity, cohort study, childbirth, pregnancy  
14  
15  
16  
17  
18  
19  
20  
21  
22  
23  
24  
25  
26  
27  
28  
29  
30  
31  
32  
33  
34  
35  
36  
37  
38  
39  
40  
41  
42  
43  
44  
45  
46  
47  
48  
49  
50  
51  
52  
53  
54  
55  
56  
57  
58  
59  
60

For peer review only

**Strengths and limitations of this study**

- Since the study was based on nationwide population-based registers, all 492,504 women fulfilling our inclusion criteria could be included, not only a sample.
- The large cohort allowed us to perform sub-group analyses and yielded high statistical precision.
- The fact that the study was conducted in Sweden, a country characterised by high employment rate among women, limits health selection into paid work.
- We could not include information on sickness absence spells shorter than 15 days.

## BACKGROUND

A substantial proportion of women suffer from physical and mental distress during pregnancy, delivery, and the postpartum period.<sup>1 2</sup> Common pregnancy-related symptoms and disorders include fatigue, headache, bowel problems, sleep-related problems, depression, urinary incontinence, back pain, and pelvic pain.<sup>3-5</sup> While most of these pregnancy-related symptoms are temporary, some more severe disorders in pregnancy or postpartum, e.g., hypertension, diabetes, and depression, may be associated with severe disorders several years later.<sup>2 6-9</sup>

The pregnancy-related physical and mental disorders can also lead to temporary and permanent work incapacity in terms of sickness absence (SA) and disability pension (DP). Some studies have found a higher risk of future SA among women after childbirth, as compared to the child's father<sup>10-12</sup> while others found that women living with children had higher SA than their counterparts not living with children.<sup>13</sup>

However, in our previous studies we found that except for the period around childbirth, women who give birth have lower mean SA/DP days per year than those who remain nulliparous, and that those having more than one childbirth have the lowest SA/DP levels 3-10 years after the childbirth.<sup>14-16</sup> It is, thus, of interest to study to what extent morbidity in these groups of women is associated with SA. We previously studied the link between childbirth and SA/DP in a cohort of Swedish twin sisters (n=5118) and found a strong association between morbidity, measured in terms of hospitalisation, and the risk of SA and DP.<sup>16-18</sup> To what extent findings from this selected and rather small group of twin sisters (n≈5000) are generalizable to the total population is unclear. Also, we wanted to include wider information on morbidity than having been hospitalised.

1  
2  
3 It is often questioned by mass media, employers, policy makers, and researchers whether the  
4  
5 higher SA among women who give birth is indeed due to higher morbidity, or rather to  
6  
7 individual choices, related rather to wanting to stay home and handle domestic duties than to  
8  
9 be in paid work.<sup>19</sup> Therefore, we wanted to explore if the findings regarding positive  
10  
11 associations between morbidity and SA/DP in twin sisters giving and not giving birth could  
12  
13 be reproduced in a larger cohort of women in Sweden. Actually, also in the general population  
14  
15 knowledge about the link between morbidity and SA or DP is limited.<sup>19-25</sup>  
16  
17

18  
19  
20 The aim of this study was to investigate in a nationwide population-based cohort the  
21  
22 associations of morbidity, assessed in terms of hospitalisation and specialised outpatient  
23  
24 healthcare, with subsequent SA and DP among initially nulliparous women with no, one, or  
25  
26 several childbirths during follow-up.  
27  
28  
29  
30  
31

## 32 **METHODS**

33  
34  
35 This longitudinal population-based cohort study was based on nationwide register microdata,  
36  
37 linked by the unique personal identity number assigned to all residents in Sweden.<sup>26</sup>  
38

39 Anonymised data from the following six registers, kept by three authorities, were used:

40  
41  
42 - From Statistics Sweden: The Longitudinal Integration Database for Health Insurance and  
43  
44 Labour Market Studies (LISA)<sup>27</sup> for information on sociodemographics and year of  
45  
46 migration.  
47

48  
49 - From the National Board of Health and Welfare: 1) The Medical Birth Register to obtain  
50  
51 information on date of deliveries and parity. It covers 97-99% of all births in Sweden since  
52  
53 1973; 2) The National In-Patient Register (established in 1964 and nationwide since 1987) for  
54  
55 information on childbirths not included in the Medical Birth Register (date and diagnoses) and  
56  
57 information on hospitalisations due to other causes (date and main and secondary diagnoses).  
58  
59  
60

1  
2  
3 If a delivery appeared in both registers, the information from the Medical Birth Register was  
4 used; 3) The National Out-Patient Register (established in 2001) for information on  
5 specialised outpatient healthcare (date and main diagnoses); 4) The Causes of Death Register  
6 for date of death.  
7  
8  
9  
10

11  
12 - From the Swedish Social Insurance Agency, for information from the Micro-data for  
13 Analyses of Social Insurance (MiDAS) Register, on SA spells >14 days and on DP (dates  
14 and extent) for the period 2002-2008.  
15  
16  
17  
18  
19  
20

### 21 **Study population**

22  
23  
24 All women aged 18-39 years who had not given birth prior to 1 January 2005 and who lived  
25 in Sweden during the period 2002-2004 were included. The limits were based on the  
26 frequency distribution of age among primiparous women in Sweden; very few women had  
27 their first child before the age of 18 or after the age of 39 years. The lower age limit of 18 also  
28 means that all had at least a chance to have had SA before inclusion (not possible before the  
29 age of 16). Women in the extremes were analyzed similarly to women of other ages. Study  
30 participants were categorised according to whether they gave birth in 2005 and during the  
31 follow-up for three years ( $Y_{+1} - Y_{+3}$ ), from date of delivery ( $T_0$ ). As the outcomes (SA and  
32 DP) might be influenced by a new pregnancy, all women were followed for an additional 43  
33 weeks after end of  $Y_{+3}$ .  
34  
35  
36  
37  
38  
39  
40  
41  
42  
43  
44  
45  
46  
47

48 The women were categorised into three groups, according to future childbirth:

- 49  
50  
51 • **B0**: Women having no childbirth registered during follow-up ( $Y_{+1} - Y_{+3}$ ) nor during the  
52 subsequent 43 weeks.  
53
- 54  
55  
56 • **B1**: Women having their first childbirth in 2005 and no more births during follow-up ( $Y_{+1} -$   
57  
58  
59  $Y_{+3}$ ) or the subsequent 43 weeks.  
60



1  
2  
3 • **B1+**: Women having their first childbirth in 2005 and at least one more birth during follow-  
4 up ( $Y_{+1} - Y_{+3}$ ) or the subsequent 43 weeks.  
5  
6

7  
8 Childbirth in the Patient Register was defined by main or secondary diagnoses according to  
9 the International Classification of Disease (ICD-10)<sup>28</sup>: O80-84 delivery, O75.7 vaginal  
10 delivery following previous caesarean section, O75.8 other specified complications of labour  
11 and delivery, and O75.9 complication of labour and delivery, unspecified.  
12  
13

14  
15 For the women in B1 and B1+, the date of birth was used for  $T_0$ , for the women in B0,  $T_0$  was  
16 set to 2 July 2005 (i.e., the middle of the year). The final cohort included 492,504 women.  
17  
18  
19  
20  
21  
22  
23  
24  
25

## 26 **Morbidity**

27  
28 We calculated the mean number of hospitalisation days and of specialised outpatient visits  
29 (i.e., morbidity requiring at least secondary healthcare) per year during the three years prior to  
30 and the three years after  $T_0$ , as a measure of morbidity. In order to investigate if morbidity in  
31 terms of hospitalisation and specialised outpatient healthcare in the year after  $T_0$  increased the  
32 risk of future SA and DP, we created a variable for morbidity during  $Y_{+1}$ , excluding diagnoses  
33 related to pregnancy, childbirth, and the postpartum period (ICD-10: O00-O99 pregnancy,  
34 childbirth and the puerperium, and Z30-Z39 health services in circumstances related to  
35 reproduction). We used information on main diagnoses, i.e., the diagnosis for which the  
36 patient was hospitalised or had specialised outpatient healthcare. In order to examine if  
37 morbidity in terms of hospitalisation and specialised outpatient healthcare prior to and/or after  
38 childbirth increased the risk of future SA and DP, we created variables, indicating morbidity  
39 during  $Y_{-3} - Y_{-1}$ , and/or  $Y_{+1}$  (excluding diagnoses related to pregnancy, childbirth and the  
40 postpartum period (ICD-10 codes: O00-O99 and Z30-Z39)).  
41  
42  
43  
44  
45  
46  
47  
48  
49  
50  
51  
52  
53  
54  
55  
56  
57  
58  
59  
60

## The Swedish sickness absence insurance system

All residents in Sweden aged 16 or older with income from work or unemployment benefits (of at least ≈900 USD/year) can claim SA benefits in case of reduced work capacity due to disease or injury; students are also included to some extent. For employees, benefits are paid by the employer during the first 14 days, and thereafter by the Social Insurance Agency.<sup>29</sup> A medical certificate is required from the 8<sup>th</sup> day of the SA spell. All residents aged 19-65 years, irrespective of whether they had income earlier, can be granted DP if their work capacity is long-term or permanently reduced due to disease or injury. The SA benefits cover 80% and the DP benefit 65% of the lost income, up to a certain level. Both SA and DP may be granted for full- or part-time (25%, 50%, or 75%) of ordinary work hours. This means that people can be on part-time SA and DP at the same time. Therefore, we calculated net days, e.g., two days of 50% of SA or DP represent one net day.

All pregnant women can choose to request parental benefit 60 days before the estimated delivery date. Parental benefit is granted for 480 days for one child (in case of singleton births), with 180 additional days per child in case of multiple pregnancies. For 390 of these days, the benefit is based on the income, while for the remaining 90 days, the benefit is set to 180 SEK per day. The parental leave days may be used anytime until the child's eight birthday, by either of the child's parents, except for 60 days that were reserved to the mother and 60 days that were reserved for the father during the years under study.

## Outcomes

We used the following measures of SA and DP as outcomes:

- The mean numbers of SA and DP net days/year were calculated for each of the six years  $Y_{-3}$  -  $Y_{+3}$ .

- General SA, defined as the first SA spell regardless of duration in  $Y_{+2} - Y_{+3}$ .
- Long-term SA, defined as the first SA spell of  $>90$  net days in  $Y_{+2} - Y_{+3}$ .
- DP, defined as the first new DP spell in  $Y_{+2} - Y_{+3}$ .

Nulliparous women with miscarriages, abortions, hysterectomies, stillbirths, unsuccessful fertilization treatments were retained in the analyses and could be in any of the three groups.

Women in long-term care facilities were followed with the registers similarly to women in the general population. Women who died or emigrated during the follow-up were censored when these events occurred.

### Included factors

We included *age* (18-24, 25-29, 30-34, and 35-39 years), *educational level* (elementary ( $\leq 9$  years + missing), high school (10-12 years), and university/college ( $>12$  years)) in December 2004, *country of birth* (Sweden, other Northern European country, other European country and rest of the world), and *type of living area* (large city, medium-sized city and small city/rural) and previous *hospitalisation and specialised outpatient healthcare* during  $Y_{-1} - Y_{-3}$  as covariates.

### Statistical analyses

We compared characteristics of the three childbirth groups by means of chi-square tests in case of categorical variables and Wilcoxon tests in case of continuous/count variables. We performed Cox proportional hazards regression models to investigate the association between childbirth, morbidity and the risks of future SA and DP. Hazard ratios (HR) and 95% confidence intervals (CI) for SA and DP were calculated. We tested the assumption of

1  
2  
3 proportional hazards with log negative log curves; there was no indication for non-  
4  
5  
6 proportionality of hazards. In these analyses we excluded the 21,848 women on DP before  $T_0$   
7  
8 as they were not at risk of future SA or DP. Follow-up started at the beginning of  $Y_{+2}$  and  
9  
10 ended upon the event, emigration, death, or the end of  $Y_{+3}$ , or at 31 December 201<8,  
11  
12 whichever came first. When performing analyses with SA as the outcome, we censored also  
13  
14 for DP during the follow-up since persons with DP are not at risk for SA. We performed  
15  
16 crude models and models adjusted for age, educational level, country of birth, type of living  
17  
18 area, hospitalisation and specialised outpatient healthcare before  $T_0$ . Analyses were also  
19  
20 performed among parous women only (B1 and B1+; n=38,413) in order to examine the  
21  
22 potential differences between women in the B1 and B1+ groups, respectively. We performed  
23  
24 analysis regarding collinearity diagnostics between morbidity during  $Y_{-3} - Y_{-1}$  and  $Y_{+1}$ , but  
25  
26 found no strong indication for collinearity for these measures.  
27  
28  
29

30  
31 All analyses were conducted by SAS Statistical Software, version 9.4.  
32  
33  
34  
35  
36

### 37 **Patient and public involvement**

38  
39 The study participants or the general public were not involved in decisions about the research  
40  
41 question, the design of the study, the outcomes, the conduct of the study, the drafting of the  
42  
43 paper, nor in the dissemination of the study results.  
44  
45  
46  
47  
48  
49  
50

### 51 **RESULTS**

52  
53  
54 Among the 492,504 women, 38,972 (7.9%) had at least one childbirth during the study period,  
55  
56 i.e., were in the B1 or B1+ groups (Table 1). The majority of the women in B1 or B1+ were  
57  
58 younger than 30 years and had a somewhat higher educational level than those in the B0  
59  
60

1  
2  
3 group. Further characteristics of the three childbirth groups are presented in Table 1. A higher  
4  
5 proportion of the women in B1 or B1+ had at least one SA spell before and/or after  $T_0$  than  
6  
7 the B0 women. On the contrary, compared to women in B1 or B1+, a higher proportion of the  
8  
9 B0 women had DP.  
10  
11  
12  
13  
14  
15  
16  
17  
18  
19  
20  
21  
22  
23  
24  
25  
26  
27  
28  
29  
30  
31  
32  
33  
34  
35  
36  
37  
38  
39  
40  
41  
42  
43  
44  
45  
46  
47  
48  
49  
50  
51  
52  
53  
54  
55  
56  
57  
58  
59  
60

For peer review only

**Table 1.** Characteristics of the cohort of women<sup>1</sup> by childbirth group (N=492,504)

| <b>Factors</b>                                    | <b>B0</b>      | <b>B1</b>     | <b>B1+</b>    | <b>p</b> |
|---------------------------------------------------|----------------|---------------|---------------|----------|
|                                                   | (n=453,532)    | (n=14,299)    | (n=23,673)    |          |
|                                                   | n (%)          | n (%)         | n (%)         |          |
| <b>Age in 2004</b>                                |                |               |               | <0.001   |
| 18-24                                             | 257,219 (56.7) | 3688 (25.8)   | 5284 (21.4)   |          |
| 25-29                                             | 92,672 (20.4)  | 4593 (32.1)   | 10,354 (42.0) |          |
| 30-34                                             | 56,233 (12.4)  | 4089 (28.6)   | 7614 (30.9)   |          |
| 35-39                                             | 47,408 (10.5)  | 1929 (13.5)   | 1421 (5.8)    |          |
| <b>Country of birth</b>                           |                |               |               | <0.001   |
| Sweden                                            | 397,091 (87.6) | 12,388 (86.6) | 22,583 (91.5) |          |
| Other Northern European                           | 4873 (1.1)     | 200 (1.4)     | 237 (1.0)     |          |
| Other European countries                          | 7432 (1.6)     | 213 (1.5)     | 242 (1.0)     |          |
| Rest of the world                                 | 44,136 (9.7)   | 1498 (10.5)   | 1611 (6.5)    |          |
| <b>Type of living area in 2004</b>                |                |               |               | <0.001   |
| Large cities                                      | 196,911 (43.4) | 6260 (43.8)   | 10,882 (44.1) |          |
| Medium-sized cities                               | 161,919 (35.7) | 4824 (33.7)   | 8425 (34.2)   |          |
| Small cities/rural                                | 94,702 (20.9)  | 3215 (22.5)   | 5366 (21.8)   |          |
| <b>Educational attainment in 2004</b>             |                |               |               | <0.001   |
| Elementary ( $\leq 9$ years)                      | 90,510 (20.0)  | 1815 (12.7)   | 1757 (7.1)    |          |
| High school (10-12 years)                         | 208,184 (45.9) | 6751 (47.2)   | 9516 (38.6)   |          |
| University/college ( $\geq 13$ years)             | 154,838 (34.1) | 5733 (40.1)   | 13,400 (54.3) |          |
| <b>Family situation in 2004</b>                   |                |               |               | <0.001   |
| Married or cohabitant                             | 20,295 (4.5)   | 3212 (22.5)   | 6843 (27.7)   |          |
| Single                                            | 433,237 (95.5) | 11,087 (77.5) | 17,830 (72.3) |          |
| <b>Hospitalisation (at least one day during):</b> |                |               |               |          |

|                                                                  |                |               |               |        |
|------------------------------------------------------------------|----------------|---------------|---------------|--------|
| Y <sub>-3</sub> - Y <sub>-1</sub>                                | 50,184 (11.1)  | 8074 (56.5)   | 13,145 (53.3) | <0.001 |
| excluding ICD-10: O and Z30-<br>Z39                              | 49,040 (10.8)  | 1726 (12.2)   | 2210 (9.0)    | <0.001 |
| Y <sub>+1</sub> - Y <sub>+3</sub>                                | 49,430 (10.9)  | 13,975 (97.7) | 24,547 (99.5) | <0.001 |
| excluding ICD-10: O and Z30-<br>Z39                              | 47,892 (10.6)  | 1691 (11.8)   | 1924 (7.8)    | <0.001 |
| Y <sub>-3</sub> - Y <sub>+3</sub>                                | 14,865 (3.3)   | 7773 (54.4)   | 13,024 (52.8) | <0.001 |
| excluding ICD-10: O and Z30-<br>Z39                              | 14,436 (3.2)   | 439 (3.1)     | 372 (1.5)     | <0.001 |
| <b>Specialised outpatient visit (at least one visit during):</b> |                |               |               |        |
| Y <sub>-3</sub> - Y <sub>-1</sub>                                | 256,677 (56.6) | 12,130 (84.8) | 19,916 (80.7) | <0.001 |
| excluding ICD-10: O and Z30-Z39                                  | 254,531 (56.1) | 10,286 (71.9) | 16,323 (66.2) | <0.001 |
| Y <sub>+1</sub> - Y <sub>+3</sub>                                | 264,932 (58.4) | 9870 (69.0)   | 19,625 (79.5) | <0.001 |
| excluding ICD-10: O and Z30-Z39                                  | 261,766 (57.7) | 9063 (63.4)   | 15,489 (62.8) | <0.001 |
| Y <sub>-3</sub> - Y <sub>+3</sub>                                | 180,667 (39.8) | 8737 (61.1)   | 16,520 (67.0) | <0.001 |
| excluding ICD-10: O and Z30-Z39                                  | 177,748 (39.2) | 7165 (50.1)   | 11,376 (46.1) | <0.001 |
| <b>At least one sickness absence spell during:</b>               |                |               |               |        |
| Y <sub>-3</sub> - Y <sub>-1</sub>                                | 54,013 (11.9)  | 5840 (40.8)   | 8802 (35.7)   | <0.001 |
| Y <sub>+1</sub> - Y <sub>+3</sub>                                | 61,341 (13.5)  | 2797 (19.6)   | 7447 (30.2)   | <0.001 |
| Y <sub>-3</sub> - Y <sub>+3</sub>                                | 90,849 (20.0)  | 6740 (47.1)   | 11,940 (48.4) | <0.001 |
| <b>Disability pension any time during:</b>                       |                |               |               |        |
| Y <sub>-3</sub> - Y <sub>-1</sub>                                | 21,289 (4.7)   | 351 (2.5)     | 208 (0.8)     | <0.001 |
| Y <sub>+1</sub> - Y <sub>+3</sub>                                | 27,453 (6.1)   | 438 (3.1)     | 238 (1.0)     | <0.001 |
| Y <sub>-3</sub> - Y <sub>+3</sub>                                | 28,121 (6.2)   | 467 (3.3)     | 256 (1.0)     | <0.001 |

<sup>1</sup>Nulliparous women aged 18-39 in December 2004 registered as residents in Sweden in 2002-2004.

1  
2  
3 B0=No childbirth in 2005 nor in the following three years + 43 weeks; B1=First child in 2005 and no more  
4 deliveries in the following three years + 43 weeks; B1+=First child in 2005 and at least one more delivery in the  
5 following three years + 43 weeks;  $Y_{-3}$ =three years before delivery/index date;  $Y_{-1}$ =one year before  
6 delivery/index date;  $Y_{+1}$ =one year after delivery/index date;  $Y_{+3}$ =three years after delivery/index date;  $T_0$ =  
7 Delivery date, or in the B0 group: 2 July 2005.  
8  
9  
10  
11  
12  
13  
14  
15  
16  
17  
18  
19  
20  
21  
22  
23  
24  
25  
26  
27  
28  
29  
30  
31  
32  
33  
34  
35  
36  
37  
38  
39  
40  
41  
42  
43  
44  
45  
46  
47  
48  
49  
50  
51  
52  
53  
54  
55  
56  
57  
58  
59  
60

For peer review only



1  
2  
3 The mean annual number of hospitalisation days and visits to specialised outpatient healthcare  
4 are presented in Figure 1. Figures 1c and 1d show that when healthcare with diagnoses for  
5 pregnancy and childbirth are excluded, women in the B1 and B1+ groups had lower number  
6 of hospitalisation days and specialised outpatient visits than women in B0, particularly the  
7 women in B1+.  
8  
9

10  
11  
12 Women in B1 or B1+ had more SA days during the year before  $T_0$ , especially in the B1 group  
13 (Figure 2). After  $T_0$ , the number of SA days for these women dropped rapidly to a lower level  
14 than for women in B0, that is, in that year most women had parental-leave benefits. However,  
15 in all studied years, women in B0 had a higher mean number of DP days/year than women in  
16 B1 or B1+. Women in B1+ had the lowest mean number of DP days/year compared to both  
17 B0 and B1+.  
18  
19

20  
21  
22 Table 2 presents crude and multivariate HR and 95% CI for the association between  
23 morbidity in  $Y_{+1}$  after  $T_0$  and future SA among all not on DP at  $T_0$ , for each of the three  
24 childbirth groups. Those on DP at  $T_0$  were excluded as they were not at risk of new DP or SA.  
25 First all three groups (B0, B1, and B1+) were compared, then the two childbirth groups (B1  
26 and B1+) were compared. In the fully adjusted models, the HR of future SA was compared  
27 between the groups, using women in the B0 group with no such morbidity as reference group.  
28 In the B0 group with such morbidity, the SA risk was approximately three-fold higher in  $Y_{+2}$ -  
29  $Y_{+3}$ . Actually, the women in B1, without morbidity in  $Y_{+1}$  had a lower risk of future SA  
30 compared to B0 women without such morbidity. Those in B1+, without morbidity at  $Y_{+1}$ , had  
31 a lower risk of long-term SA ( $>90$  days) in  $Y_{+2}$ - $Y_{+3}$ , however, a higher risk for any SA.  
32  
33  
34  
35  
36  
37  
38  
39  
40  
41  
42  
43  
44  
45  
46  
47  
48  
49  
50  
51  
52  
53  
54  
55  
56  
57  
58  
59  
60

**Table 2.** Crude and adjusted hazard ratios and 95% confidence intervals for the association between childbirth, morbidity one year after T<sub>0</sub> and new sickness absence in the second and third year after T<sub>0</sub><sup>1</sup>

| Morbidity <sup>2</sup>                                  | SA in Y <sub>+2</sub> -Y <sub>+3</sub> (regardless of number of SA days) |                                          |                      |                      | Long-term SA (>90 days) in Y <sub>+2</sub> -Y <sub>+3</sub> |                                          |                      |                      |  |
|---------------------------------------------------------|--------------------------------------------------------------------------|------------------------------------------|----------------------|----------------------|-------------------------------------------------------------|------------------------------------------|----------------------|----------------------|--|
|                                                         | Outcome                                                                  | Hazard ratios (95% confidence intervals) |                      |                      | Outcome                                                     | Hazard ratios (95% confidence intervals) |                      |                      |  |
|                                                         |                                                                          | Crude                                    | Model 1 <sup>3</sup> | Model 2 <sup>4</sup> |                                                             | Crude                                    | Model 1 <sup>3</sup> | Model 2 <sup>4</sup> |  |
| <b>All women (n=470,656)</b>                            |                                                                          |                                          |                      |                      |                                                             |                                          |                      |                      |  |
| B0, no morbidity in Y <sub>1</sub> <sup>5</sup>         | 39,911                                                                   | 1                                        | 1                    | 1                    | 12,614                                                      | 1                                        | 1                    | 1                    |  |
| B0, morbidity in Y <sub>1</sub> <sup>5</sup>            | 3891                                                                     | 3.29 (3.18-3.40)                         | 3.24 (3.14-3.35)     | 2.56 (2.48-2.65)     | 1855                                                        | 4.61 (4.39-4.84)                         | 4.51 (4.30-4.74)     | 3.33 (3.16-3.50)     |  |
| B1, no morbidity in Y <sub>1</sub> <sup>5</sup>         | 1837                                                                     | 1.45 (1.38-1.52)                         | 1.14 (1.09-1.20)     | 0.81 (0.77-0.85)     | 590                                                         | 1.46 (1.34-1.58)                         | 1.05 (0.97-1.14)     | 0.68 (0.62-0.74)     |  |
| B1, morbidity in Y <sub>1</sub> <sup>5</sup>            | 153                                                                      | 3.61 (3.08-4.23)                         | 2.89 (2.46-3.38)     | 1.87 (1.59-2.19)     | 81                                                          | 5.66 (4.55-7.04)                         | 4.21 (3.38-5.24)     | 2.43 (1.95-3.02)     |  |
| B1+, no morbidity in Y <sub>1</sub> <sup>5</sup>        | 6451                                                                     | 3.01 (2.93-3.09)                         | 2.50 (2.43-2.57)     | 1.82 (1.77-1.87)     | 1212                                                        | 1.67 (1.58-1.78)                         | 1.26 (1.18-1.34)     | 0.84 (0.79-0.89)     |  |
| B1+, morbidity in Y <sub>1</sub> <sup>5</sup>           | 233                                                                      | 5.95 (5.23-6.77)                         | 5.01 (4.40-5.69)     | 3.32 (2.92-3.78)     | 67                                                          | 4.48 (3.52-5.70)                         | 3.41 (2.68-4.34)     | 2.03 (1.59-2.58)     |  |
| <b>Women who had at least one childbirth (n=38,413)</b> |                                                                          |                                          |                      |                      |                                                             |                                          |                      |                      |  |
| B1, no morbidity in Y <sub>1</sub> <sup>5</sup>         | 1837                                                                     | 1                                        | 1                    | 1                    | 590                                                         | 1                                        | 1                    | 1                    |  |
| B1, morbidity in Y <sub>1</sub> <sup>5</sup>            | 153                                                                      | 2.54 (2.15-3.00)                         | 2.52 (2.14-2.97)     | 2.38 (2.02-2.81)     | 81                                                          | 3.93 (3.12-4.96)                         | 3.85 (3.05-4.85)     | 3.55 (2.81-4.48)     |  |
| B1+, no morbidity in Y <sub>1</sub> <sup>5</sup>        | 6451                                                                     | 2.10 (2.00-2.22)                         | 2.17 (2.06-2.29)     | 2.20 (2.09-2.32)     | 1212                                                        | 1.15 (1.04-1.27)                         | 1.21 (1.09-1.33)     | 1.23 (1.11-1.36)     |  |
| B1+, morbidity in Y <sub>1</sub> <sup>5</sup>           | 233                                                                      | 4.26 (3.72-4.89)                         | 4.44 (3.87-5.08)     | 4.23 (3.69-4.85)     | 67                                                          | 3.10 (2.41-3.99)                         | 3.21 (2.49-4.13)     | 2.99 (2.32-3.85)     |  |

1  
2  
3  
4  
5  
6  
7  
8  
9  
10  
11  
12  
13  
14  
15  
16  
17  
18  
19  
20  
21  
22  
23  
24  
25  
26  
27  
28  
29  
30  
31  
32  
33  
34  
35  
36  
37  
38  
39  
40  
41  
42  
43  
44  
45  
46

T<sub>0</sub>= Delivery date or equivalent; SA=sickness absence; Y<sub>+2</sub>=two years after delivery/index date; Y<sub>+3</sub>=three years after delivery/index date; B0=No childbirth in 2005 nor in the following three years + 43 weeks; B1=First child in 2005 and no more deliveries in the following three years + 43 weeks; Y<sub>+1</sub>=one year after delivery/index date; B1+=First child in 2005 and at least one more delivery in the following three years + 43 weeks.

<sup>1</sup>Women on DP at baseline were excluded

<sup>2</sup>Morbidity: measured by hospitalisation and specialised outpatient visit

<sup>3</sup>Model 1: Adjusted for age, education, country of birth, and type of living area

<sup>4</sup>Model 2: Adjusted for age, education, country of birth, type of living area, and previous hospitalisation and specialised outpatient visit

<sup>5</sup>Diagnoses O00-O99 and Z30-Z39 were excluded.

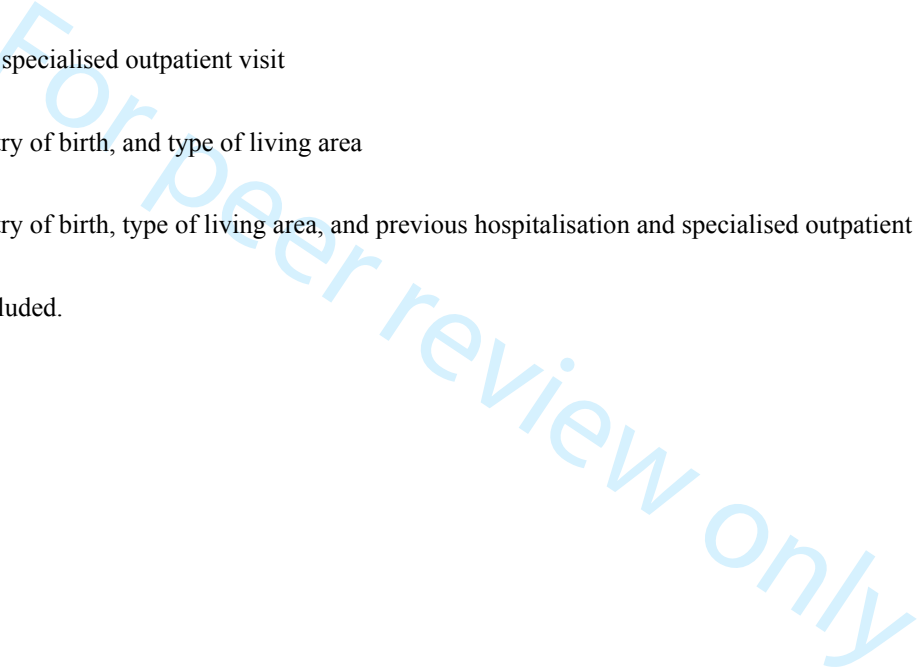

1  
2  
3 When restricting the analyses to women in B1 and B1+ (n=38,413), those in B1+ with  
4 morbidity in  $Y_{+1}$  had a particularly high risk of any SA compared to all other groups. When  
5 again excluding those on DP at  $T_0$ , the HR for future DP was highest in the B0 group with  
6 morbidity in  $Y_{+1}$ , using the women in B0 with no morbidity in  $Y_{+1}$  as reference group (Table  
7 3). Regardless of morbidity, parous women, particularly those in B1+, had a lower risk of DP  
8 than women in B0. When restricting the analyses to only women in B1 and B1+, morbidity  
9 was associated with having DP in  $Y_{+2}$ - $Y_{+3}$ , especially in the B1 group. That is, those with  
10 more than one birth had lower risk of DP.  
11  
12  
13  
14  
15  
16  
17  
18  
19  
20  
21  
22  
23  
24  
25  
26  
27  
28  
29  
30  
31  
32  
33  
34  
35  
36  
37  
38  
39  
40  
41  
42  
43  
44  
45  
46  
47  
48  
49  
50  
51  
52  
53  
54  
55  
56  
57  
58  
59  
60

**Table 3.** Hazard ratios and 95% confidence intervals for the association between childbirth, morbidity one year after T<sub>0</sub> and new disability pension in the second and third year after T<sub>0</sub><sup>1</sup>

| Morbidity <sup>2</sup>                                  | Outcome | Hazard ratios and 95% confidence intervals for DP in Y <sub>+2</sub> -Y <sub>+3</sub> |                      |                      |
|---------------------------------------------------------|---------|---------------------------------------------------------------------------------------|----------------------|----------------------|
|                                                         |         | Crude                                                                                 | Model 1 <sup>3</sup> | Model 2 <sup>4</sup> |
| <b>All women (n=470,656)</b>                            |         |                                                                                       |                      |                      |
| B0, no morbidity in Y <sub>1</sub> <sup>5</sup>         | 5374    | 1                                                                                     | 1                    | 1                    |
| B0, morbidity in Y <sub>1</sub> <sup>5</sup>            | 1391    | 7.72 (7.28-8.19)                                                                      | 6.88 (6.48-7.30)     | 4.11 (3.87-4.37)     |
| B1, no morbidity in Y <sub>1</sub> <sup>5</sup>         | 90      | 0.52 (0.42-0.64)                                                                      | 0.41 (0.33-0.50)     | 0.20 (0.16-0.24)     |
| B1, morbidity in Y <sub>1</sub> <sup>5</sup>            | 25      | 3.77 (2.55-5.59)                                                                      | 2.82 (1.90-4.17)     | 1.17 (0.79-1.73)     |
| B1+, no morbidity in Y <sub>1</sub> <sup>5</sup>        | 39      | 0.13 (0.09-0.17)                                                                      | 0.11 (0.08-0.16)     | 0.06 (0.04-0.08)     |
| B1+, morbidity in Y <sub>1</sub> <sup>5</sup>           | 8       | 1.20 (0.60-2.40)                                                                      | 1.01 (0.50-2.01)     | 0.43 (0.21-0.85)     |
| <b>Women who had at least one childbirth (n=38,413)</b> |         |                                                                                       |                      |                      |
| B1, no morbidity in Y <sub>1</sub> <sup>5</sup>         | 90      | 1                                                                                     | 1                    | 1                    |
| B1, morbidity in Y <sub>1</sub> <sup>5</sup>            | 25      | 7.32 (4.70-11.40)                                                                     | 6.27 (4.02-9.79)     | 5.68 (3.63-8.87)     |
| B1+, no morbidity in Y <sub>1</sub> <sup>5</sup>        | 39      | 0.24 (0.17-0.35)                                                                      | 0.28 (0.19-0.41)     | 0.28 (0.19-0.42)     |
| B1+, morbidity in Y <sub>1</sub> <sup>5</sup>           | 8       | 2.32 (1.12-4.77)                                                                      | 2.30 (1.12-4.75)     | 2.07 (1.00-4.27)     |

T<sub>0</sub>= Delivery date or among those in B0: 2 July 2005; DP=disability pension; Y<sub>+2</sub>=two years after delivery/index date; Y<sub>+3</sub>=three years after delivery/index date; B0=No childbirth in 2005 nor in the following three years +43 weeks; Y<sub>+1</sub>=one year after delivery/index date; B1=First child in 2005 and no more deliveries in the following three years + 43 weeks; B1+=First child in 2005 and at least one more delivery in the following three years + 43 weeks.

<sup>1</sup>Women on DP at baseline were excluded

1  
2  
3 <sup>2</sup>Morbidity: measured by hospitalisation and specialised outpatient visit  
4

5 <sup>3</sup>Model 1: Adjusted for age, education, country of birth and type of living area  
6

7 <sup>4</sup>Model 2: Adjusted for age, education, country of birth, type of living area, and previous hospitalisation and specialised outpatient visit  
8

9 <sup>5</sup>Diagnoses O00-O99 and Z30-Z39 were excluded.  
10  
11  
12  
13  
14  
15  
16  
17  
18  
19  
20  
21  
22  
23  
24  
25  
26  
27  
28  
29  
30  
31  
32  
33  
34  
35  
36  
37  
38  
39  
40  
41  
42  
43  
44  
45  
46

For peer review only

1  
2  
3 When investigating the associations between the amount of morbidity (classified as no  
4 morbidity, morbidity before  $T_0$ , morbidity after  $T_0$ , and morbidity both before and after  $T_0$ ,  
5 respectively) and the risk of SA and DP in  $Y_{+2}$ - $Y_{+3}$  among women who gave birth, we found a  
6 gradient across these categories; there was a particularly high risk of future SA and DP among  
7 women with morbidity both before and after  $T_0$  (Tables 4 and 5).  
8  
9  
10  
11  
12  
13  
14  
15  
16  
17  
18  
19  
20  
21  
22  
23  
24  
25  
26  
27  
28  
29  
30  
31  
32  
33  
34  
35  
36  
37  
38  
39  
40  
41  
42  
43  
44  
45  
46  
47  
48  
49  
50  
51  
52  
53  
54  
55  
56  
57  
58  
59  
60

For peer review only

**Table 4.** Hazard ratios and 95% confidence intervals for the association between morbidity before and after the first birth and new sickness absence in the second and third year after  $T_0$  in women who had at least one childbirth (n=38,413)<sup>1</sup>

| Morbidity <sup>2</sup>                                                    | Hazard ratios and 95% confidence intervals                   |                  |                      |                                                 |                  |                      |
|---------------------------------------------------------------------------|--------------------------------------------------------------|------------------|----------------------|-------------------------------------------------|------------------|----------------------|
|                                                                           | SA in $Y_{+2}$ - $Y_{+3}$ (regardless of the number of days) |                  |                      | Long-term SA (> 90 days) in $Y_{+2}$ - $Y_{+3}$ |                  |                      |
|                                                                           | Outcome                                                      | Crude            | Model 1 <sup>3</sup> | Outcome                                         | Crude            | Model 1 <sup>3</sup> |
| No morbidity during $Y_{-3}$ - $Y_{-1}$ or $Y_{+1}$ <sup>4</sup>          | 3825                                                         | 1                | 1                    | 742                                             | 1                | 1                    |
| Morbidity during $Y_{-3}$ - $Y_{-1}$ but not during $Y_{+1}$ <sup>4</sup> | 4463                                                         | 1.33 (1.28-1.39) | 1.34 (1.28-1.40)     | 1060                                            | 1.59 (1.44-1.74) | 1.57 (1.42-1.72)     |
| No morbidity during $Y_{-3}$ - $Y_{-1}$ but during $Y_{+1}$ <sup>4</sup>  | 123                                                          | 1.95 (1.63-2.34) | 1.96 (1.64-2.35)     | 51                                              | 3.91 (2.94-5.19) | 3.84 (2.89-5.09)     |
| Morbidity both during $Y_{-3}$ - $Y_{-1}$ and $Y_{+1}$ <sup>4</sup>       | 263                                                          | 2.50 (2.21-2.83) | 2.57 (2.27-2.91)     | 97                                              | 4.19 (3.39-5.18) | 4.09 (3.31-5.06)     |

$T_0$ = Delivery date or equivalent; SA=sickness absence;  $Y_{+2}$ =two years after delivery;  $Y_{+3}$ =three years after delivery;  $Y_{-3}$ =three years before delivery;  $Y_{-1}$ =one year before delivery;  $Y_{+1}$ =one year after delivery.

<sup>1</sup>Women on DP at baseline were excluded

<sup>2</sup>Morbidity: measured by hospitalisation and specialised outpatient visit

<sup>3</sup>Model 1: Adjusted for age, education, country of birth, and type of living area

<sup>4</sup>Diagnoses O00-O99 and Z30-Z39 were excluded.



**Table 5.** Hazard ratios and 95% confidence intervals for the association between morbidity before and after the first birth and new disability pension in the second and third year after T<sub>0</sub> in women who had at least one childbirth (n=38,413) <sup>1</sup>

| Morbidity <sup>2</sup>                                                                        | Outcome | Hazard ratios and 95% confidence intervals for DP in Y <sub>+2</sub> -Y <sub>+3</sub> |                      |
|-----------------------------------------------------------------------------------------------|---------|---------------------------------------------------------------------------------------|----------------------|
|                                                                                               |         | Crude                                                                                 | Model 1 <sup>3</sup> |
| No morbidity during Y <sub>-3</sub> -Y <sub>-1</sub> or Y <sub>+1</sub> <sup>4</sup>          | 41      | 1                                                                                     | 1                    |
| Morbidity during Y <sub>-3</sub> -Y <sub>-1</sub> but not during Y <sub>+1</sub> <sup>4</sup> | 88      | 2.35 (1.62-3.41)                                                                      | 2.13 (1.47-3.10)     |
| No morbidity during Y <sub>-3</sub> -Y <sub>-1</sub> but during Y <sub>+1</sub> <sup>4</sup>  | 9       | 11.70 (5.69-24.06)                                                                    | 9.90 (4.80-20.42)    |
| Morbidity both during Y <sub>-3</sub> -Y <sub>-1</sub> and Y <sub>+1</sub> <sup>4</sup>       | 24      | 17.45 (10.54-28.87)                                                                   | 13.20 (7.92-21.98)   |

T<sub>0</sub>= Delivery date or equivalent; DP=sickness absence; Y<sub>+2</sub>=two years after delivery/index date; Y<sub>+3</sub>=three years after delivery/index date; Y<sub>-3</sub>=three years before delivery/index date; Y<sub>-1</sub>=one year before delivery/index date; Y<sub>+1</sub>=one year after delivery/index date.

<sup>1</sup>Women on DP at baseline were excluded

<sup>2</sup>Model 1: Adjusted for age, education, country of birth, and type of living area

<sup>3</sup>Morbidity: measured by hospitalisation and specialised outpatient visit

<sup>4</sup>Diagnoses O00-O99 and Z30-Z39 excluded.

## DISCUSSION

In this longitudinal, population-based cohort study of 492,504 women in Sweden, we investigated the associations of morbidity (i.e., hospitalisation, specialised outpatient healthcare that is not related to pregnancy, childbirth, or postpartum) with future SA and DP in our three groups of initially nulliparous women, i.e., B0, B1, and B1+. During  $Y_{-1}$  parous women had higher mean number of SA days than women in B0. This decreased gradually during the years after  $T_0$ . On the other hand, over all the six studied years the women in the B0 group had a higher number of DP days than women in B1 and B1+. When excluding those on DP at  $T_0$ , we found that morbidity was strongly associated with a higher risk of future SA and DP, regardless of childbirth status. Analyses focusing solely on women who gave birth showed that morbidity both before and after the first childbirth was associated with a particularly high risk of future SA and DP.

Research has repeatedly shown that women have a higher probability of having SA or DP than men<sup>30 31</sup> and pregnancy/childbirth is considered to be one of the reasons behind this difference.<sup>11 12 19 32 33</sup> Our results that SA days increased in  $Y_{-1}$ , that is, during pregnancy, as well as that the number became much lower in  $Y_{+1}$  (when most are on parental leave) are in line with some previous studies.<sup>11 14 15 17 18 34</sup> The somewhat higher levels of SA in  $Y_{+3}$  could be explained by the double-burden hypothesis which suggests that the combination of paid work and parenthood may lead to worse health.<sup>35-38</sup> However, several other studies have suggested that multiple roles are likely to be beneficial to women's health.<sup>39-41</sup> A Norwegian study also reported a higher level of SA in the years after pregnancy, which disappeared after accounting for SA during subsequent pregnancies.<sup>38</sup> Moreover, women who remained nulliparous had higher levels of DP than those who gave birth. Our findings also showed higher mean number of hospitalisation days among nulliparous women, indicating that there might be a health selection into pregnancy.

1  
2  
3 Women with morbidity that was not related to pregnancy, childbirth, and the postpartum  
4 period after delivery, had an overall higher risk for future SA, regardless of childbirth status  
5 than the other women. This association persisted even after adjustment for age, education, and  
6 previous morbidity. Women in B1 had a lower risk of any SA and of long-term SA than those  
7 in B0 (>90 days), whereas women who had more than one birth had a higher risk of any SA  
8 but a lower risk of long-term SA in  $Y_{+2}$ - $Y_{+3}$ . It is likely that the new pregnancy(ies) during the  
9 follow-up time resulted in SA for women in the B1+ group. Our finding regarding an inverse  
10 association between the number of births and DP might indicate better health among the  
11 women in the B1+ group than in the other two groups. These findings are also in line with  
12 two Swedish prospective cohort studies of female twins.<sup>17 42</sup> Comparison of women who gave  
13 birth to one child only to those who gave birth to several children, showed similar graded  
14 associations between morbidity and future SA/DP as when we compared parous women with  
15 nulliparous women.

16  
17 It has often been questioned by mass media, employers, and policy makers whether the higher  
18 SA among women – and in particular among women with small children – is due to really  
19 being ill or whether they use SA as a means to ease their “double burden” arising from work  
20 and domestic duties.<sup>19</sup> Nevertheless, we found that morbidity both before and after delivery  
21 was the strongest risk factor for SA and DP among women who gave birth. We observed a  
22 graded association between morbidity and SA/DP; women with morbidity before *or* after their  
23 first childbirth had a higher risk of SA and DP than those without morbidity, whereas those  
24 with morbidity both before *and* after the first childbirth had even higher risks. This suggests  
25 the presence of a dose-response association between morbidity and higher future SA/DP risk.  
26 Also this is in line with our previous studies of Swedish twin sisters.<sup>17 42</sup> To the best of our  
27 knowledge, this is the first study to document associations between morbidity and SA/DP

1  
2  
3 among women of childbearing age in the general population, using data on both  
4  
5 hospitalisation and specialised outpatient healthcare as well as on number of childbirths.  
6  
7  
8  
9

### 10 11 **Strengths and limitations** 12

13  
14 Strengths of this study include the population-based longitudinal cohort design, that all  
15  
16 women fulfilling the inclusion criteria could be included (not only a sample) and the large  
17  
18 cohort allowing for sub-group analyses. Other strengths are the possibility to use extensive  
19  
20 microdata linked from several high-quality nationwide administrative registers,<sup>43-45</sup> instead of  
21  
22 self-reports that are limited by, e.g., recall bias and drop-outs. It was also an advantage that all  
23  
24 study participants could be followed from date of birth or equivalent, rather than by calendar  
25  
26 years. The universal coverage of the Swedish public SA/DP insurance system further reduces  
27  
28 selection bias and misclassification of the outcome. Another strength is that we could use also  
29  
30 the National Patient Register to identify the childbirths not registered in the Medical Birth  
31  
32 Register. Additionally, the high employment rates among women on the Swedish labour  
33  
34 market limits<sup>46</sup> bias due to health selection into paid work, i.e., if a very large proportion of  
35  
36 the population is in paid work, more persons with different type of morbidity are in paid  
37  
38 work.  
39  
40  
41  
42  
43  
44

45 There are, however, some limitations that should be mentioned. First, some immigrant women  
46  
47 might only have given birth before coming to Sweden; they would consequently be  
48  
49 inappropriately categorised as nulliparous. The Medical Birth Register has information on  
50  
51 whether the woman had previous births, also outside of Sweden, however, not the Patient  
52  
53 Register. To reduce such misclassification, we only included women who lived in Sweden for  
54  
55 at least three years prior to inclusion in the study. If there were any such misclassification it  
56  
57 probably led to underestimation of SA and DP in the B0 group and does thus not affect our  
58  
59  
60

1  
2  
3 conclusions. It is important to be aware of that we studied women who gave birth, irrespective  
4  
5 of if they lived with the child or lived with other children. For instance, the child might have  
6  
7 died or the women given it up for adoption – also, nulliparous women might live with  
8  
9 children they did not give birth to. Another aspect is that SA spells  $\leq 14$  days were not  
10  
11 included, something that can be seen both as a limitation and a strength. The SA spells  $\leq 14$   
12  
13 days only account for a limited number of all SA days and most of them are not verified by a  
14  
15 physician certificate.<sup>47</sup> Furthermore, since the Patient Register includes only information on  
16  
17 in-patient and specialised outpatient healthcare, we could not include in our definition of  
18  
19 morbidity information from primary healthcare.  
20  
21  
22  
23  
24  
25  
26  
27

## 28 **Conclusions**

29  
30 It has been questioned whether sickness absent women with children are actually ill or rather  
31  
32 ease their “double burden” through claiming SA.<sup>19</sup> In this study we found a strong association  
33  
34 between morbidity and both SA and DP among women of childbearing ages after controlling  
35  
36 for morbidity before baseline and for several demographic factors. It has also been suggested  
37  
38 that women with more children have more SA. We found the opposite; women with one birth  
39  
40 had a lower future SA and DP risk than those who did not give birth, while those who gave  
41  
42 birth more than once had the lowest risk of DP. Our findings may inform the debate in  
43  
44 welfare states concerning the presence of morbidity in women on SA, in particular among  
45  
46 women with small children.  
47  
48  
49  
50  
51  
52  
53

54 **Contributors** MW conducted the analyses, wrote the first draft and revised the paper; KL  
55  
56 contributed to interpretation of the findings and revised the paper; PS and KA contributed to  
57  
58 the conception and design of the study, interpretation of the findings and revised the paper;  
59  
60

1  
2  
3 LN contribute to the interpretation of the findings, writing and revised the paper. All authors  
4  
5 have read and approved the final version of the manuscript.  
6  
7

8 **Funding** This work was financially supported by AFA Insurance (grant number 160318). The  
9  
10 funder was not involved in the study design, collection or analysis of the data, interpretation  
11  
12 of the results, writing of the paper nor in decisions about the manuscript submission.  
13  
14

15  
16 **Competing interests** None declared.  
17

18  
19 **Patient consent for publication** Not applicable.  
20

21  
22 **Ethics approval** The project was approved by the Regional Ethical Review Board of  
23  
24 Stockholm.  
25

26  
27 **Data sharing statement** No additional data available.  
28  
29  
30  
31  
32  
33  
34  
35  
36  
37  
38  
39  
40  
41  
42  
43  
44  
45  
46  
47  
48  
49  
50  
51  
52  
53  
54  
55  
56  
57  
58  
59  
60

1  
2  
3 **FIGURE LEGENDS**  
4

5  
6 Figure 1. Mean annual number of hospitalization days and specialized outpatient visits (with  
7  
8 95% confidence intervals).  
9

10  
11 Figure 2. Mean annual number of days on sickness absence and/or disability pension (with  
12  
13 95% confidence intervals)  
14  
15  
16  
17  
18  
19  
20  
21  
22  
23  
24  
25  
26  
27  
28  
29  
30  
31  
32  
33  
34  
35  
36  
37  
38  
39  
40  
41  
42  
43  
44  
45  
46  
47  
48  
49  
50  
51  
52  
53  
54  
55  
56  
57  
58  
59  
60

For peer review only

**REFERENCES**

1. Sedgh G, Singh S, Hussain R. Intended and unintended pregnancies worldwide in 2012 and recent trends. *Studies in family planning* 2014;45(3):301-14. doi: 10.1111/j.1728-4465.2014.00393.x [published Online First: 2014/09/11]
2. Williams D. Pregnancy: a stress test for life. *Current opinion in obstetrics & gynecology* 2003;15(6):465-71. doi: 10.1097/01.gco.0000103846.69273.ba [published Online First: 2003/11/19]
3. Cheng CY, Li Q. Integrative review of research on general health status and prevalence of common physical health conditions of women after childbirth. *Women's health issues : official publication of the Jacobs Institute of Women's Health* 2008;18(4):267-80. doi: 10.1016/j.whi.2008.02.004 [published Online First: 2008/05/13]
4. Saurel-Cubizolles MJ, Romito P, Lelong N, et al. Women's health after childbirth: a longitudinal study in France and Italy. *BJOG : an international journal of obstetrics and gynaecology* 2000;107(10):1202-9. [published Online First: 2000/10/12]
5. Troy NW. A comparison of fatigue and energy levels at 6 weeks and 14 to 19 months postpartum. *Clinical nursing research* 1999;8(2):135-52. doi: 10.1177/10547739922158205 [published Online First: 2000/07/11]
6. Khatun M, Clavarino AM, Callaway L, et al. Common symptoms during pregnancy to predict depression and health status 14 years post partum. *International journal of gynaecology and obstetrics: the official organ of the International Federation of Gynaecology and Obstetrics* 2009;104(3):214-7. doi: 10.1016/j.ijgo.2008.10.019 [published Online First: 2008/11/28]
7. Brown MC, Best KE, Pearce MS, et al. Cardiovascular disease risk in women with pre-eclampsia: systematic review and meta-analysis. *European journal of epidemiology*



- 1  
2  
3 2013;28(1):1-19. doi: 10.1007/s10654-013-9762-6 [published Online First:  
4  
5 2013/02/12]  
6  
7  
8 8. Mannisto T, Mendola P, Vaarasmaki M, et al. Elevated blood pressure in pregnancy and  
9  
10 subsequent chronic disease risk. *Circulation* 2013;127(6):681-90. doi:  
11  
12 10.1161/circulationaha.112.128751 [published Online First: 2013/02/13]  
13  
14 9. Miller J, Kane Low L, Zielinski R, et al. Evaluating maternal recovery from labor and  
15  
16 delivery: bone and levator ani injuries. *American Journal of Obstetrics and*  
17  
18 *Gynecology* 2015;213(2):188.e1-88.e11.  
19  
20  
21 10. Mastekaasa A. Parenthood, gender and sickness absence. *Social science & medicine*  
22  
23 *(1982)* 2000;50(12):1827-42. [published Online First: 2000/05/08]  
24  
25  
26 11. Alexanderson K, Hensing G, Carstensen J, et al. Pregnancy-related sickness absence  
27  
28 among employed women in a Swedish county. *Scandinavian journal of work,*  
29  
30 *environment & health* 1995;21(3):191-8. [published Online First: 1995/06/01]  
31  
32  
33 12. Alexanderson K, Hensing G, Leijon M, et al. Pregnancy related sickness absence in a  
34  
35 Swedish county, 1985-87. *Journal of epidemiology and community health*  
36  
37 1994;48(5):464-70. [published Online First: 1994/10/01]  
38  
39  
40 13. Floderus B, Hagman M, Aronsson G, et al. Medically certified sickness absence with  
41  
42 insurance benefits in women with and without children. *European journal of public*  
43  
44 *health* 2012;22:85-92.  
45  
46  
47 14. László K, Björkenstam C, Svedberg P, et al. Sickness absence and disability pension  
48  
49 before and after first childbirth and in nulliparous women by numerical gender-  
50  
51 segregation of occupations: a Swedish population-based longitudinal cohort study.  
52  
53 *PloS one* 2019;14(12):e0226198.  
54  
55  
56 15. Narusyte J, Bjorkenstam E, Alexanderson K, et al. Occurrence of sickness absence and  
57  
58 disability pension in relation to childbirth: A 16-year follow-up study of 6323 Swedish  
59  
60

- twins. *Scandinavian journal of public health* 2016;44(1):98-105. doi:  
10.1177/1403494815610051 [published Online First: 2015/10/16]
16. Björkenstam C, László K, Orellana C, et al. Sickness absence and disability pension in relation to first childbirth and in nulliparous women according to occupational groups: A cohort study of 492,504 women in Sweden. *BMC public health* 2020;Accepted
17. Björkenstam E, Narusyte J, Alexanderson K, et al. Associations between childbirth, hospitalization and disability pension: a cohort study of female twins. *PloS one* 2014;9(7):e101566. doi: 10.1371/journal.pone.0101566 [published Online First: 2014/07/08]
18. Björkenstam C, Orellana C, Laszlo KD, et al. Sickness absence and disability pension before and after first childbirth and in nulliparous women: longitudinal analyses of three cohorts in Sweden. *BMJ open* 2019;9(9):e031593. doi: 10.1136/bmjopen-2019-031593
19. Angelov N, Johansson, P. & Lindahl, E. . Sick of family responsibilities? *Empirical Economics* 2018 doi: doi:10.1007/s00181-018-1552-2
20. Alexanderson K, Norlund A. Swedish Council on Technology Assessment in Health Care (SBU). Chapter 1. Aim, background, key concepts, regulations, and current statistics. *Scandinavian journal of public health Supplement* 2004;63:12-30. doi: 10.1080/14034950410021808 [published Online First: 2004/10/30]
21. Allebeck P, Mastekaasa A. Swedish Council on Technology Assessment in Health Care (SBU). Chapter 3. Causes of sickness absence: research approaches and explanatory models. *Scandinavian journal of public health Supplement* 2004;63:36-43. doi: 10.1080/14034950410021835 [published Online First: 2004/10/30]

- 1  
2  
3 22. Englund L, Tibblin G, Svardsudd K. Variations in sick-listing practice among male and  
4  
5 female physicians of different specialities based on case vignettes. *Scandinavian*  
6  
7 *journal of primary health care* 2000;18(1):48-52. [published Online First: 2000/05/16]  
8  
9  
10 23. Sydsjo A, Sydsjo G, Kjessler B. Sick leave and social benefits during pregnancy--a  
11  
12 Swedish-Norwegian comparison. *Acta Obstet Gynecol Scand* 1997;76(8):748-54.  
13  
14 24. Sydsjo G, Sydsjo A. Newly delivered women's evaluation of personal health status and  
15  
16 attitudes towards sickness absence and social benefits. *Acta Obstet Gynecol Scand*  
17  
18 2002;81(2):104-11.  
19  
20 25. Larsson C, Sydsjo A, Alexanderson K, et al. Obstetricians' attitudes and opinions on  
21  
22 sickness absence and benefits during pregnancy. *Acta Obstet Gynecol Scand*  
23  
24 2006;85(2):165-70.  
25  
26  
27 26. Ludvigsson JF, Otterblad-Olausson P, Pettersson BU, et al. The Swedish personal identity  
28  
29 number: possibilities and pitfalls in healthcare and medical research. *European*  
30  
31 *journal of epidemiology* 2009;24(11):659-67. doi: 10.1007/s10654-009-9350-y  
32  
33  
34 27. Ludvigsson JF, Svedberg P, Olen O, et al. The longitudinal integrated database for health  
35  
36 insurance and labour market studies (LISA) and its use in medical research. *European*  
37  
38 *journal of epidemiology* 2019;34(4):423-37. doi: 10.1007/s10654-019-00511-8  
39  
40 [published Online First: 2019/04/01]  
41  
42  
43 28. WHO. International Statistical Classification of Diseases and Related Health Problems,  
44  
45 Tenth Revision (ICD-10). Chapter V (F). Geneva: WHO 1993.  
46  
47  
48 29. Social insurance in figures, 2016. : the Swedish Social Insurance Agency, 2016.  
49  
50  
51 30. Leinonen T, Viikari-Juntura E, Husgafvel-Pursiainen K, et al. Labour Market Segregation  
52  
53 and Gender Differences in Sickness Absence: Trends in 2005-2013 in Finland. *Annals*  
54  
55 *of work exposures and health* 2018;62(4):438-49. doi: 10.1093/annweh/wxx107  
56  
57 [published Online First: 2018/01/05]  
58  
59  
60

- 1  
2  
3 31. Allebeck P, Mastekaasa A. Swedish Council on Technology Assessment in Health Care  
4 (SBU). Chapter 5. Risk factors for sick leave - general studies. (Systematic review).  
5  
6  
7  
8  
9  
10 32. Alexanderson K, Sydsjo A, Hensing G, et al. Impact of pregnancy on gender differences  
11  
12  
13  
14  
15 33. Åkerlind I, Alexanderson A, Hensing G, et al. Sex Differences in Sickness Absence, in  
16  
17  
18  
19 34. Sydsjo A, Sydsjo G, Alexanderson K. Influence of pregnancy-related diagnoses on sick-  
20  
21  
22  
23  
24  
25  
26  
27  
28  
29 35. Lidwall U, Marklund S, Voss M. Work-family interference and long-term sickness  
30  
31  
32  
33  
34  
35  
36  
37  
38  
39  
40  
41  
42  
43  
44  
45  
46  
47  
48  
49  
50  
51  
52  
53  
54  
55  
56  
57  
58  
59  
60
31. Allebeck P, Mastekaasa A. Swedish Council on Technology Assessment in Health Care (SBU). Chapter 5. Risk factors for sick leave - general studies. (Systematic review). *Scandinavian journal of public health Supplement* 2004(63):49-108.
32. Alexanderson K, Sydsjo A, Hensing G, et al. Impact of pregnancy on gender differences in sickness absence. *Scandinavian journal of social medicine* 1996;24(3):169-76.
33. Åkerlind I, Alexanderson A, Hensing G, et al. Sex Differences in Sickness Absence, in relation to Parental Status. *Scandinavian journal of social medicine* 1995;4(1):27-35.
34. Sydsjo A, Sydsjo G, Alexanderson K. Influence of pregnancy-related diagnoses on sick-leave data in women aged 16-44. *Journal of women's health & gender-based medicine* 2001;10(7):707-14. doi: 10.1089/15246090152563597 [published Online First: 2001/09/26]
35. Lidwall U, Marklund S, Voss M. Work-family interference and long-term sickness absence: a longitudinal cohort study. *European journal of public health* 2010;20(6):676-81. doi: 10.1093/eurpub/ckp201 [published Online First: 2009/12/17]
36. Vaananen A, Kevin MV, Ala-Mursula L, et al. The double burden of and negative spillover between paid and domestic work: associations with health among men and women. *Women & health* 2004;40(3):1-18. [published Online First: 2005/04/15]
37. Blank N, Diderichsen F. Short-term and long-term sick-leave in Sweden: relationships with social circumstances, working conditions and gender. *Scandinavian journal of social medicine* 1995;23(4):265-72. [published Online First: 1995/12/01]
38. Rieck K, Telle K. Sick leave before, during and after pregnancy. . *Acta Sociologica* 2013;56:117-37.
39. McMunn A, Bartley M, Hardy R, et al. Life course social roles and women's health in mid-life: causation or selection? *Journal of epidemiology and community health*

- 2006;60(6):484-9. doi: 10.1136/jech.2005.042473 [published Online First: 2006/05/16]
40. Lahelma E, Arber S, Kivela K, et al. Multiple roles and health among British and Finnish women: the influence of socioeconomic circumstances. *Social science & medicine (1982)* 2002;54(5):727-40. [published Online First: 2002/05/10]
41. Fokkema T. Combining a job and children: contrasting the health of married and divorced women in the Netherlands? *Social science & medicine (1982)* 2002;54(5):741-52. [published Online First: 2002/05/10]
42. Bjorkenstam E, Alexanderson K, Narusyte J, et al. Childbirth, hospitalisation and sickness absence: a study of female twins. *BMJ open* 2015;5(1):e006033. doi: 10.1136/bmjopen-2014-006033 [published Online First: 2015/01/13]
43. Ludvigsson JF, Andersson E, Ekblom A, et al. External review and validation of the Swedish national inpatient register. *BMC public health* 2011;11:450. doi: 10.1186/1471-2458-11-450 [published Online First: 2011/06/11]
44. Cnattingius S, Ericson A, Gunnarskog J, et al. A quality study of a medical birth registry. *Scandinavian journal of social medicine* 1990;18(2):143-8. [published Online First: 1990/06/01]
45. Ludvigsson JF, Almqvist C, Bonamy AK, et al. Registers of the Swedish total population and their use in medical research. *European journal of epidemiology* 2016;31(2):125-36. doi: 10.1007/s10654-016-0117-y [published Online First: 2016/01/16]
46. Labour Force Surveys: Fourth Quarter 2017. Stockholm: Statistics Sweden, 2017.
47. Hensing G, Alexanderson K, Allebeck P, et al. How to measure sickness absence? Literature review and suggestion of five basic measures. *Scandinavian journal of social medicine* 1998;26(2):133-44. [published Online First: 1998/07/11]

1 a) Average annual number of days with hospitalisation

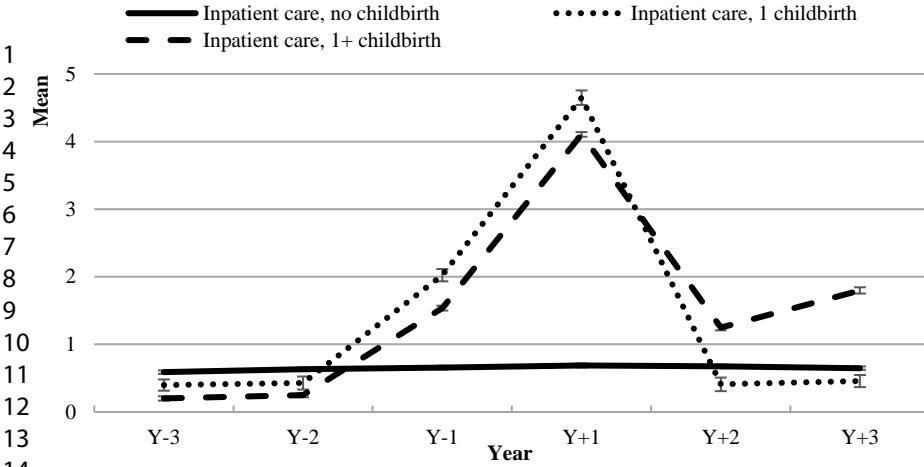

1 b) Mean annual number of specialised outpatient visits

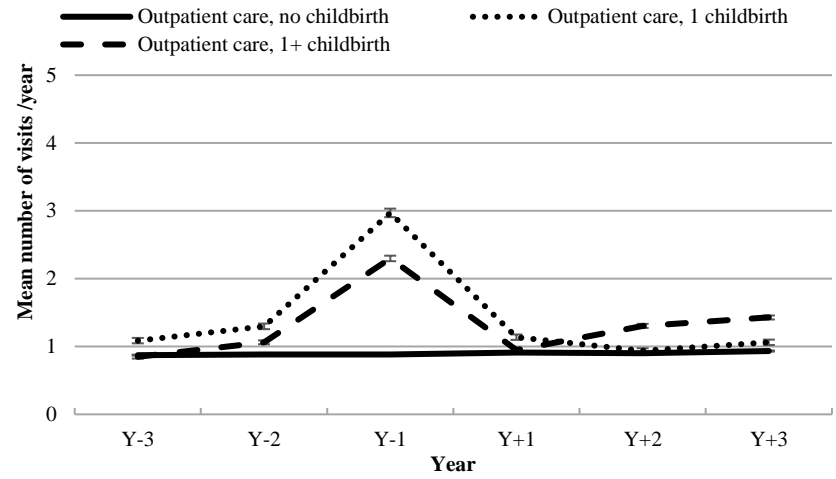

17 1 c) Mean annual number of days with hospitalisation (excluding hospitalisations with a diagnosis for pregnancy, childbirth and the puerperium)

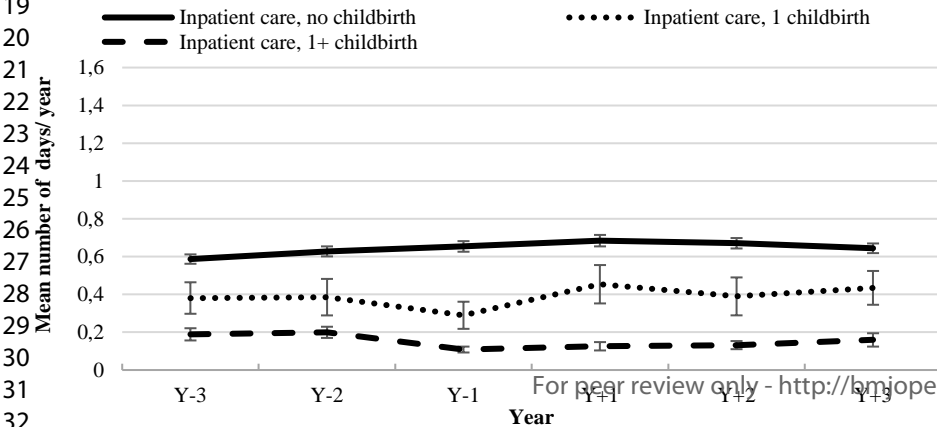

18 1 d) Mean annual number of specialised outpatient visits (excluding visits with a diagnosis for pregnancy, childbirth and the puerperium)

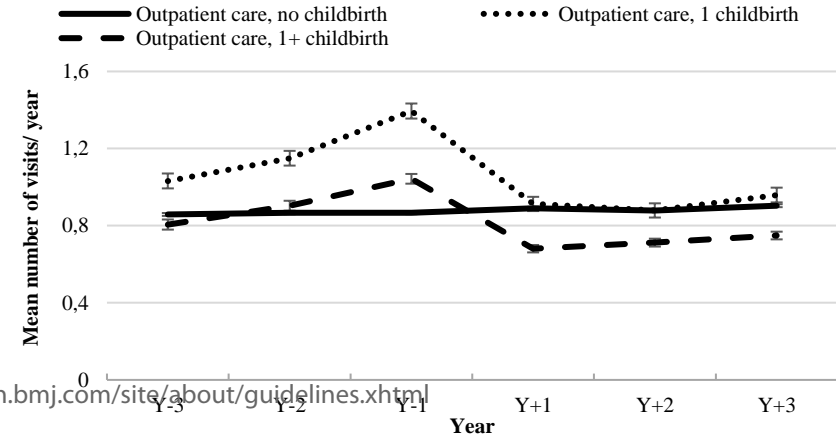

2 a) Mean annual net number of days on sickness absence (SA)

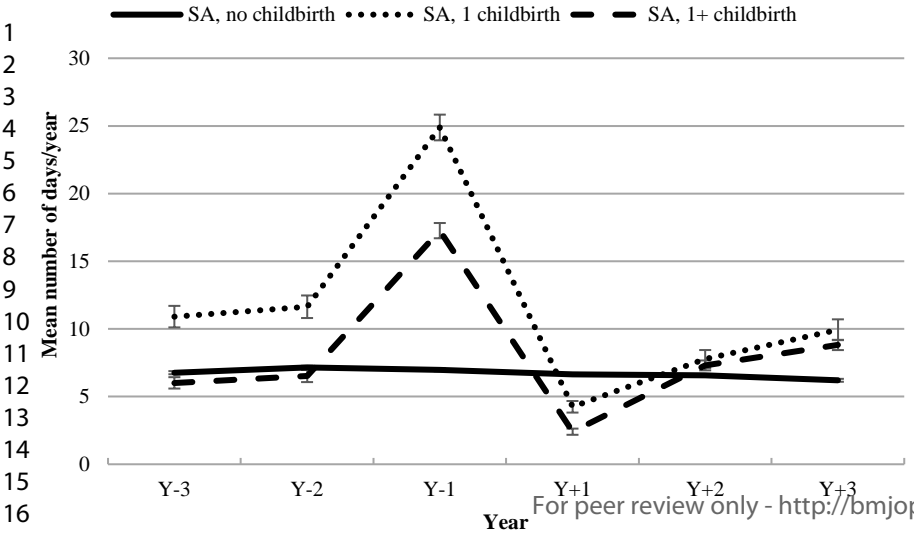

2 b) Mean annual net number of days on disability pension (DP)

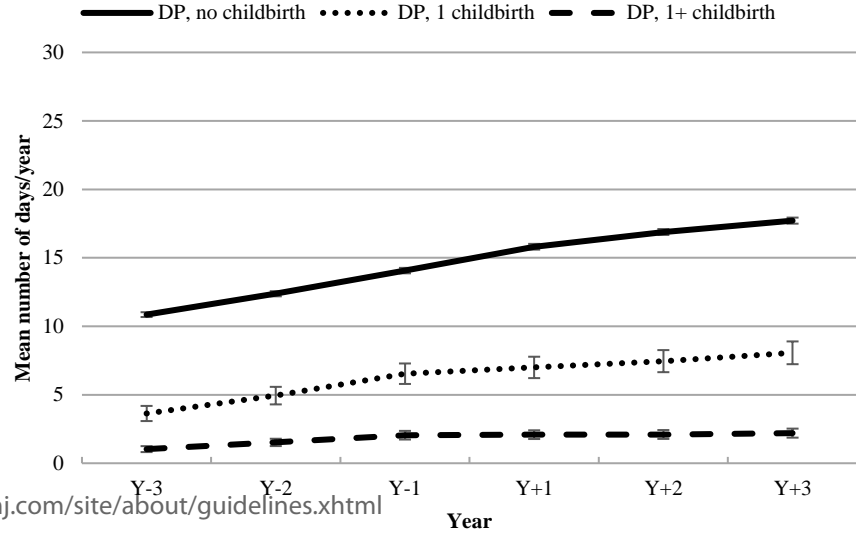

STROBE Statement—Checklist of items that should be included in reports of *cohort studies*

|                              | Item No | Recommendation                                                                                                                                                                                    | Page                       |
|------------------------------|---------|---------------------------------------------------------------------------------------------------------------------------------------------------------------------------------------------------|----------------------------|
| <b>Title and abstract</b>    | 1       | (a) Indicate the study's design with a commonly used term in the title or the abstract                                                                                                            | p. 1, 2                    |
|                              |         | (b) Provide in the abstract an informative and balanced summary of what was done and what was found                                                                                               | p. 2                       |
| <b>Introduction</b>          |         |                                                                                                                                                                                                   |                            |
| Background/rationale         | 2       | Explain the scientific background and rationale for the investigation being reported                                                                                                              | p. 5-6                     |
| Objectives                   | 3       | State specific objectives, including any prespecified hypotheses                                                                                                                                  | p. 6                       |
| <b>Methods</b>               |         |                                                                                                                                                                                                   |                            |
| Study design                 | 4       | Present key elements of study design early in the paper                                                                                                                                           | p. 6-7                     |
| Setting                      | 5       | Describe the setting, locations, and relevant dates, including periods of recruitment, exposure, follow-up, and data collection                                                                   | p. 6-10                    |
| Participants                 | 6       | (a) Give the eligibility criteria, and the sources and methods of selection of participants. Describe methods of follow-up                                                                        | p. 6-10                    |
|                              |         | (b) For matched studies, give matching criteria and number of exposed and unexposed                                                                                                               | -                          |
| Variables                    | 7       | Clearly define all outcomes, exposures, predictors, potential confounders, and effect modifiers. Give diagnostic criteria, if applicable                                                          | p. 7-10                    |
| Data sources/<br>measurement | 8*      | For each variable of interest, give sources of data and details of methods of assessment (measurement). Describe comparability of assessment methods if there is more than one group              | p. 6-10                    |
| Bias                         | 9       | Describe any efforts to address potential sources of bias                                                                                                                                         | p. 11                      |
| Study size                   | 10      | Explain how the study size was arrived at                                                                                                                                                         | p. 7-8, 13-14              |
| Quantitative variables       | 11      | Explain how quantitative variables were handled in the analyses. If applicable, describe which groupings were chosen and why                                                                      | p. 7-10, 13-14             |
| Statistical methods          | 12      | (a) Describe all statistical methods, including those used to control for confounding                                                                                                             | p. 10-11                   |
|                              |         | (b) Describe any methods used to examine subgroups and interactions                                                                                                                               | p. 11                      |
|                              |         | (c) Explain how missing data were addressed                                                                                                                                                       | -                          |
|                              |         | (d) If applicable, explain how loss to follow-up was addressed                                                                                                                                    | p. 11                      |
|                              |         | (e) Describe any sensitivity analyses                                                                                                                                                             | p. 11                      |
| <b>Results</b>               |         |                                                                                                                                                                                                   |                            |
| Participants                 | 13*     | (a) Report numbers of individuals at each stage of study—eg numbers potentially eligible, examined for eligibility, confirmed eligible, included in the study, completing follow-up, and analysed | p. 7-8, 13-14              |
|                              |         | (b) Give reasons for non-participation at each stage                                                                                                                                              | p. 7-8, 13-14              |
|                              |         | (c) Consider use of a flow diagram                                                                                                                                                                | -                          |
| Descriptive data             | 14*     | (a) Give characteristics of study participants (eg demographic, clinical, social) and information on exposures and potential confounders                                                          | p. 13-14                   |
|                              |         | (b) Indicate number of participants with missing data for each variable of interest                                                                                                               | p. 13-14                   |
|                              |         | (c) Summarise follow-up time (eg, average and total amount)                                                                                                                                       | -                          |
| Outcome data                 | 15*     | Report numbers of outcome events or summary measures over time                                                                                                                                    | Tables 2-5,<br>Figures 1-2 |
| Main results                 | 16      | (a) Give unadjusted estimates and, if applicable, confounder-adjusted                                                                                                                             | Tables 2-5,                |



|                          |    |                                                                                                                                                                            |             |
|--------------------------|----|----------------------------------------------------------------------------------------------------------------------------------------------------------------------------|-------------|
|                          |    | estimates and their precision (eg, 95% confidence interval). Make clear which confounders were adjusted for and why they were included                                     | Figures 1-2 |
|                          |    | (b) Report category boundaries when continuous variables were categorized                                                                                                  | p. 12-13    |
|                          |    | (c) If relevant, consider translating estimates of relative risk into absolute risk for a meaningful time period                                                           | -           |
| Other analyses           | 17 | Report other analyses done—eg analyses of subgroups and interactions, and sensitivity analyses                                                                             | p. 22-24    |
| <b>Discussion</b>        |    |                                                                                                                                                                            |             |
| Key results              | 18 | Summarise key results with reference to study objectives                                                                                                                   | p. 25       |
| Limitations              | 19 | Discuss limitations of the study, taking into account sources of potential bias or imprecision. Discuss both direction and magnitude of any potential bias                 | p. 27, 28   |
| Interpretation           | 20 | Give a cautious overall interpretation of results considering objectives, limitations, multiplicity of analyses, results from similar studies, and other relevant evidence | p. 25-28    |
| Generalisability         | 21 | Discuss the generalisability (external validity) of the study results                                                                                                      | p. 27, 28   |
| <b>Other information</b> |    |                                                                                                                                                                            |             |
| Funding                  | 22 | Give the source of funding and the role of the funders for the present study and, if applicable, for the original study on which the present article is based              | p. 29       |

\*Give information separately for exposed and unexposed groups.

**Note:** An Explanation and Elaboration article discusses each checklist item and gives methodological background and published examples of transparent reporting. The STROBE checklist is best used in conjunction with this article (freely available on the Web sites of PLoS Medicine at <http://www.plosmedicine.org/>, Annals of Internal Medicine at <http://www.annals.org/>, and Epidemiology at <http://www.epidem.com/>). Information on the STROBE Initiative is available at <http://www.strobe-statement.org>.

# BMJ Open

## Childbirth, morbidity, sickness absence, and disability pension: a population-based longitudinal cohort study in Sweden

|                                 |                                                                                                                                                                                                                                                                                                                                            |
|---------------------------------|--------------------------------------------------------------------------------------------------------------------------------------------------------------------------------------------------------------------------------------------------------------------------------------------------------------------------------------------|
| Journal:                        | <i>BMJ Open</i>                                                                                                                                                                                                                                                                                                                            |
| Manuscript ID                   | bmjopen-2020-037726.R2                                                                                                                                                                                                                                                                                                                     |
| Article Type:                   | Original research                                                                                                                                                                                                                                                                                                                          |
| Date Submitted by the Author:   | 15-Sep-2020                                                                                                                                                                                                                                                                                                                                |
| Complete List of Authors:       | Wang, Mo; Karolinska Institute, Laszlo, Krisztina; Karolinska Institute Svedberg, Pia; Karolinska Institute, Department of Clinical Neuroscience Nylén, Lotta; Karolinska Institutet, Department of Public Health Sciences, Division of Social Medicine Alexanderson, Kristina; Karolinska Institutet, Department of Clinical Neuroscience |
| <b>Primary Subject Heading</b>: | Public health                                                                                                                                                                                                                                                                                                                              |
| Secondary Subject Heading:      | Reproductive medicine                                                                                                                                                                                                                                                                                                                      |
| Keywords:                       | REPRODUCTIVE MEDICINE, PUBLIC HEALTH, EPIDEMIOLOGY                                                                                                                                                                                                                                                                                         |
|                                 |                                                                                                                                                                                                                                                                                                                                            |

SCHOLARONE™  
Manuscripts



I, the Submitting Author has the right to grant and does grant on behalf of all authors of the Work (as defined in the below author licence), an exclusive licence and/or a non-exclusive licence for contributions from authors who are: i) UK Crown employees; ii) where BMJ has agreed a CC-BY licence shall apply, and/or iii) in accordance with the terms applicable for US Federal Government officers or employees acting as part of their official duties; on a worldwide, perpetual, irrevocable, royalty-free basis to BMJ Publishing Group Ltd ("BMJ") its licensees and where the relevant Journal is co-owned by BMJ to the co-owners of the Journal, to publish the Work in this journal and any other BMJ products and to exploit all rights, as set out in our [licence](#).

The Submitting Author accepts and understands that any supply made under these terms is made by BMJ to the Submitting Author unless you are acting as an employee on behalf of your employer or a postgraduate student of an affiliated institution which is paying any applicable article publishing charge ("APC") for Open Access articles. Where the Submitting Author wishes to make the Work available on an Open Access basis (and intends to pay the relevant APC), the terms of reuse of such Open Access shall be governed by a Creative Commons licence – details of these licences and which [Creative Commons](#) licence will apply to this Work are set out in our licence referred to above.

Other than as permitted in any relevant BMJ Author's Self Archiving Policies, I confirm this Work has not been accepted for publication elsewhere, is not being considered for publication elsewhere and does not duplicate material already published. I confirm all authors consent to publication of this Work and authorise the granting of this licence.

1  
2  
3 **Childbirth, morbidity, sickness absence, and disability pension: a**  
4  
5  
6 **population-based longitudinal cohort study in Sweden**  
7  
8  
9  
10  
11  
12  
13  
14  
15

16 Mo Wang<sup>1</sup>, Krisztina D. László<sup>1,2</sup>, Pia Svedberg<sup>1</sup>, Lotta Nylén<sup>1,2,3</sup>, Kristina Alexanderson<sup>1</sup>  
17  
18  
19  
20  
21

22 <sup>1</sup> Division of Insurance Medicine, Department of Clinical Neuroscience, Karolinska Institutet,  
23 Stockholm, Sweden  
24  
25

26 <sup>2</sup> Department of Global Public Health, Karolinska Institutet, Stockholm, Sweden  
27  
28

29 <sup>3</sup> Academic Primary Healthcare Centre, Stockholm Region, Stockholm, Sweden  
30  
31  
32  
33  
34

35 Correspondence to: Krisztina László  
36  
37

38 Division of Insurance Medicine, Department of Clinical Neuroscience, Karolinska Institutet,  
39 SE-171 77 Stockholm, Sweden  
40  
41

42 E-mail: [krisztina.laszlo@ki.se](mailto:krisztina.laszlo@ki.se); Telephone: +46730209761  
43  
44  
45  
46  
47  
48  
49

50 Word count for the text: 3951  
51  
52  
53  
54  
55  
56  
57  
58  
59  
60

## ABSTRACT

**Objective** To investigate associations of morbidity with subsequent sickness absence (SA) and disability pension (DP) among initially nulliparous women with no, one, or several childbirths during follow-up.

**Design** Longitudinal register-based cohort study.

**Setting** Sweden.

**Participants** Nulliparous women, aged 18-39 years and living in Sweden on 31 December 2004 and the three preceding years (n=492,504).

**Outcome measures** Annual mean DP and SA days (in SA spells >14 days) in the three years before and after inclusion date in 2005.

**Methods** Women were categorised into three groups: no childbirth in 2005 nor during the follow-up, a first childbirth in 2005, but not during follow-up, and having a first childbirth in 2005 and at least one more during follow-up. Microdata were obtained for three years before and three years after inclusion regarding SA, DP, mortality, and morbidity (i.e., hospitalisation and specialised outpatient healthcare, also excluding healthcare for pregnancy, childbirth, and puerperium). Hazard ratios and 95% confidence intervals for SA and DP in year 2 and 3 after childbirth were estimated by Cox regression; excluding those on DP at inclusion.

**Results** After controlling for study participants' prior morbidity and sociodemographic characteristics, women with one childbirth had a lower risk of SA and DP than those who remained nulliparous, while women with more than one childbirth had the lowest DP risk. Morbidity after inclusion that was not related to pregnancy, childbirth, or the puerperium was associated with a higher risk of future SA and DP, regardless of childbirth group. Furthermore, morbidity both before and after childbirth showed a strong association with SA and DP (hazard ratio range: 2.54-13.12).

1  
2  
3 **Conclusions** We found a strong positive association between morbidity and both SA and DP  
4  
5 among women, regardless of childbirth status. Those who gave birth had lower future SA and  
6  
7 DP risk than those who did not.  
8  
9

10  
11  
12  
13 **Keywords:** sick leave, disability pension, morbidity, cohort study, childbirth, pregnancy  
14  
15  
16  
17  
18  
19  
20  
21  
22  
23  
24  
25  
26  
27  
28  
29  
30  
31  
32  
33  
34  
35  
36  
37  
38  
39  
40  
41  
42  
43  
44  
45  
46  
47  
48  
49  
50  
51  
52  
53  
54  
55  
56  
57  
58  
59  
60

For peer review only

**Strengths and limitations of this study**

- Since the study was based on nationwide population-based registers, all 492,504 women fulfilling our inclusion criteria could be included, not only a sample.
- The large cohort allowed us to perform sub-group analyses and yielded high statistical precision.
- The fact that the study was conducted in Sweden, a country characterised by high employment rate among women, limits health selection into paid work.
- We could not include information on sickness absence spells shorter than 15 days.

## BACKGROUND

In societies with a high rate of female employment, women have on average a higher mean number of sickness absence (SA) days than men.<sup>1-4</sup> This gender difference in SA becomes more pronounced with the first pregnancy and childbirth.<sup>5-7</sup> Several studies among women also show a temporary increase in the number of SA days during pregnancy.<sup>8-13</sup> Other authors report that women living with children have higher SA than their counterparts not living with children.<sup>14</sup> In contrast, when including also long-term SA, in terms of disability pension (DP), we in some studies found that except for the period before childbirth, women who give birth have lower mean SA/DP days per year than those who remain nulliparous, and that those having more than one childbirth have the lowest SA/DP levels 3-10 years after the childbirth.<sup>12 15 16</sup>

The increase in SA in relation to pregnancy and childbirth may have several explanations. During pregnancy and the puerperium women experience profound endocrine, immune, metabolic, and cardiovascular changes.<sup>17 18</sup> The pregnancy-related immune changes increase susceptibility to infectious diseases and to more complicated courses in case of common infections. Immune changes affect also the activity of several autoimmune diseases, e.g., in case of some disorders (such as rheumatoid arthritis, multiple sclerosis, Graves disease, Hashimoto thyroiditis) there is an improvement during pregnancy and a worsening postpartum, while for others (such as systemic lupus erythematosus, systemic sclerosis) there is an inverse manifestation.<sup>19</sup> Pregnancy and the postpartum period are considered a “stress test of life”, i.e., several diseases presenting first during this period may reveal the individual’s susceptibility to later disorders, e.g. diabetes, psychiatric, or cardiovascular diseases.<sup>18 20-23</sup> Furthermore, the antenatal care and the screening for several disorders during pregnancy may increase women’s chance to be diagnosed during this period with pre-existing, undetected chronic conditions. A substantial proportion of women suffer from common



1  
2  
3 pregnancy-related symptoms and disorders<sup>18 24</sup> such as fatigue, headache, bowel problems,  
4  
5 sleep-related problems, depression, urinary incontinence, back pain, and pelvic pain,<sup>25-27</sup>  
6  
7 which may also contribute to SA during pregnancy.  
8  
9

10 Mass media, employers, policy makers, and researchers have questioned whether the higher  
11  
12 SA among women with children is indeed due to higher morbidity, or rather to individual  
13  
14 choices, related to wanting to stay home and handle domestic duties than to be in paid work.<sup>28</sup>  
15  
16 To the best of our knowledge, only one previous study investigated associations between  
17  
18 morbidity and SA/DP among women giving and not giving birth. In a cohort of Swedish twin  
19  
20 sisters (n=5118) they found a strong association between morbidity, measured in terms of  
21  
22 hospitalisation, and the risk of SA and DP.<sup>29</sup> To what extent findings from this selected and  
23  
24 rather small group of twin sisters are generalizable to the total population is unclear. Also, it  
25  
26 would be of interest to include wider information on morbidity than hospitalisation in such  
27  
28 analyses. Most people with morbidity are not on SA or DP and knowledge about the  
29  
30 associations between morbidity and SA or DP is in general limited.<sup>28 30-35</sup>  
31  
32  
33  
34  
35

36 Thus, the aim of this study was to investigate, in a nationwide population-based cohort, the  
37  
38 associations of morbidity, assessed in terms of hospitalisation and specialised outpatient  
39  
40 healthcare, with subsequent SA and DP among initially nulliparous women with no, one, or  
41  
42 several childbirths during follow-up.  
43  
44  
45  
46  
47  
48

## 49 **METHODS**

50  
51 This longitudinal population-based cohort study was based on nationwide register microdata,  
52  
53 linked by the unique personal identity number assigned to all residents in Sweden.<sup>36</sup>  
54  
55

56 Anonymised data from the following six registers, kept by three authorities, were used:  
57  
58  
59  
60

1  
2  
3 - From Statistics Sweden: The Longitudinal Integration Database for Health Insurance and  
4 Labour Market Studies (LISA)<sup>37</sup> for information on sociodemographics and year of  
5 migration.  
6  
7

8  
9  
10 - From the National Board of Health and Welfare: 1) The Medical Birth Register to obtain  
11 information on date of deliveries and parity. It covers 97-99% of all births in Sweden since  
12 1973; 2) The National In-Patient Register (established in 1964 and nationwide since 1987) for  
13 information on childbirths not included in the Medical Birth Register (date and diagnoses) and  
14 information on hospitalisations due to other causes (date and main and secondary diagnoses).  
15 If a delivery appeared in both registers, the information from the Medical Birth Register was  
16 used; 3) The National Out-Patient Register (established in 2001) for information on  
17 specialised outpatient healthcare (date and main diagnoses); 4) The Causes of Death Register  
18 for date of death.  
19  
20

21 - From the Swedish Social Insurance Agency, for information from the Micro-data for  
22 Analyses of Social Insurance (MiDAS) Register, on SA spells >14 days and on DP (dates  
23 and extent) for the period 2002-2008.  
24  
25  
26  
27  
28  
29

### 30 **Study population**

31  
32 All women aged 18-39 years who had not given birth prior to 1 January 2005 and who lived  
33 in Sweden during the period 2002-2004 were included. The limits were based on the  
34 frequency distribution of age among primiparous women in Sweden; very few women had  
35 their first child before the age of 18 or after the age of 39 years. The lower age limit of 18 also  
36 means that all had at least a chance to have had SA before inclusion (not possible before the  
37 age of 16). Women in the extremes were analyzed similarly to women of other ages. Study  
38 participants were categorised according to whether they gave birth in 2005 and during the  
39 follow-up for three years ( $Y_{+1} - Y_{+3}$ ), from date of delivery ( $T_0$ ). As the outcomes (SA and  
40  
41  
42  
43  
44  
45  
46  
47  
48  
49  
50  
51  
52  
53  
54  
55  
56  
57  
58  
59  
60

1  
2  
3 DP) might be influenced by a new pregnancy, all women were followed for an additional 43  
4  
5 weeks after end of  $Y_{+3}$ .  
6  
7

8 The women were categorised into three groups, according to future childbirth:  
9

- 10  
11 • **B0**: Women having no childbirth registered during follow-up ( $Y_{+1} - Y_{+3}$ ) nor during the  
12 subsequent 43 weeks.  
13  
14  
15  
16 • **B1**: Women having their first childbirth in 2005 and no more births during follow-up ( $Y_{+1} -$   
17  $Y_{+3}$ ) or the subsequent 43 weeks.  
18  
19  
20  
21  
22 • **B1+**: Women having their first childbirth in 2005 and at least one more birth during follow-  
23 up ( $Y_{+1} - Y_{+3}$ ) or the subsequent 43 weeks.  
24  
25  
26

27 Childbirth in the Patient Register was defined by main or secondary diagnoses according to  
28 the International Classification of Disease (ICD-10)<sup>38</sup>: O80-84 delivery, O75.7 vaginal  
29 delivery following previous caesarean section, O75.8 other specified complications of labour  
30 and delivery, and O75.9 complication of labour and delivery, unspecified.  
31  
32  
33  
34  
35

36 For the women in B1 and B1+, the date of birth was used for  $T_0$ , for the women in B0,  $T_0$  was  
37 set to 2 July 2005 (i.e., the middle of the year). The final cohort included 492,504 women.  
38  
39  
40  
41  
42  
43  
44

## 45 **Morbidity**

46 We measured morbidity in different ways. One was to calculate the mean number of  
47 hospitalisation days and of specialised outpatient visits (i.e., morbidity requiring at least  
48 secondary healthcare) per year during the three years prior to and the three years after the date  
49 of  $T_0$ . Another was the occurrence of any hospitalisation and/or specialised outpatient  
50 healthcare in the years before  $T_0$  ( $Y_{-3}-Y_{-1}$ ), in the year after  $T_0$  ( $Y_{+1}$ ), and in the three years after  
51  $T_0$  ( $Y_{+1} - Y_{+3}$ ), respectively. All those measures were calculated for all such secondary  
52  
53  
54  
55  
56  
57  
58  
59  
60

1  
2  
3 healthcare, excluding visits due to screening for diseases, etc. (ICD-10 codes Z00-2 and Z10-  
4  
5 13). The same measures were derived when having excluded such healthcare for diagnoses  
6  
7 related to pregnancy, childbirth, and the postpartum period (ICD-10: O00-O99 pregnancy,  
8  
9 childbirth and the puerperium, and Z30-Z39 health services in circumstances related to  
10  
11 reproduction). For the exclusions we used information on main diagnoses, i.e., the diagnosis  
12  
13 for which the patient was hospitalised or had specialised outpatient healthcare.  
14  
15  
16  
17  
18  
19  
20

### 21 **The Swedish sickness absence insurance system**

22  
23 All residents in Sweden aged 16 or older with income from work or unemployment benefits  
24  
25 (of at least  $\approx 900$  USD/year) can claim SA benefits in case of reduced work capacity due to  
26  
27 disease or injury; students are also included to some extent. For employees, benefits are paid  
28  
29 by the employer during the first 14 days, and thereafter by the Social Insurance Agency.<sup>39</sup> A  
30  
31 medical certificate is required from the 8<sup>th</sup> day of the SA spell. All residents aged 19-65 years,  
32  
33 irrespective of whether they had income earlier, can be granted DP if their work capacity is  
34  
35 long-term or permanently reduced due to disease or injury. The SA benefits cover 80% and  
36  
37 the DP benefit 65% of the lost income, up to a certain level. Both SA and DP may be granted  
38  
39 for full- or part-time (25%, 50%, or 75%) of ordinary work hours. This means that people can  
40  
41 be on part-time SA and DP at the same time. Therefore, we calculated net days, e.g., two days  
42  
43 of 50% of SA or DP represent one net day.  
44  
45  
46  
47

48 All pregnant women can choose to request parental benefit 60 days before the estimated  
49  
50 delivery date. Parental benefit is granted for 480 days for one child (in case of singleton  
51  
52 births), with 180 additional days per child in case of multiple pregnancies. For 390 of these  
53  
54 days, the benefit is based on the income, while for the remaining 90 days, the benefit is set to  
55  
56 180 SEK per day. The parental leave days may be used anytime until the child's eight  
57  
58 birthday, by either of the child's parents, except for 60 days that were reserved to the mother  
59  
60

1  
2  
3 and 60 days that were reserved for the father during the years under study. If a parent on  
4 parental leave is too ill to care for the child, he/she may apply for SA, and thus be on SA  
5 instead of parental leave while someone else takes care of the child.  
6  
7  
8  
9

## 10 11 12 13 **Outcomes**

14  
15  
16 We used the following measures of SA and DP as outcomes:

- 17  
18 • The mean numbers of SA and DP net days/year were calculated for each of the six  
19 years  $Y_{-3}$  -  $Y_{+3}$ .
- 20  
21 • General SA, defined as the first SA spell regardless of duration in  $Y_{+2}$  -  $Y_{+3}$ .
- 22  
23 • Long-term SA, defined as the first SA spell of >90 net days in  $Y_{+2}$  -  $Y_{+3}$ .
- 24  
25 • DP, defined as the first new DP spell in  $Y_{+2}$  -  $Y_{+3}$ .

26  
27  
28  
29  
30  
31 Nulliparous women with miscarriages, abortions, hysterectomies, stillbirths, unsuccessful  
32 fertilization treatments were retained in the analyses and could be in any of the three groups.

33  
34  
35  
36 Women in long-term care facilities were followed with the registers similarly to women in the  
37 general population. Women who died or emigrated during the follow-up were censored when  
38 these events occurred.  
39  
40  
41  
42  
43  
44  
45  
46

## 47 **Included factors**

48  
49 We included *age* (18-24, 25-29, 30-34, and 35-39 years), *educational level* (elementary ( $\leq 9$   
50 years + missing), high school (10-12 years), and university/college (>12 years)) in December  
51 2004, *country of birth* (Sweden, other Northern European country, other European country  
52 and rest of the world), and *type of living area* (large city, medium-sized city, and small  
53  
54  
55  
56  
57  
58  
59  
60

1  
2  
3 city/rural) and previous *hospitalisation and specialised outpatient healthcare* during  $Y_{-1}$ - $Y_{-3}$   
4  
5 as covariates.  
6  
7  
8  
9

## 10 11 **Statistical analyses**

12  
13  
14 We compared characteristics of the three childbirth groups by means of chi-square tests in  
15 case of categorical variables and Wilcoxon tests in case of continuous/count variables. We  
16 performed Cox proportional hazards regression models to investigate associations between  
17 the combinations of childbirth, morbidity, and the risks of future SA and DP. Hazard ratios  
18 (HR) and 95% confidence intervals (CI) for SA and DP were calculated. We tested the  
19 assumption of proportional hazards with log negative log curves; there was no indication for  
20 non-proportionality of hazards. In these analyses we excluded the 21,848 women on DP  
21 before  $T_0$  as they were not at risk of future SA or DP. Follow-up started at the beginning of  
22  $Y_{+2}$  and ended upon the event, emigration, death, or the end of  $Y_{+3}$ , or at 31 December 2018,  
23 whichever came first. When performing analyses with SA as the outcome, we censored also  
24 for DP during the follow-up since persons with DP are not at risk for SA. We performed  
25 crude models and models adjusted for age, educational level, country of birth, type of living  
26 area, hospitalisation and specialised outpatient healthcare before  $T_0$ . Analyses were also  
27 performed among parous women only (B1 and B1+;  $n=38,413$ ) in order to examine the  
28 potential differences between women in the B1 and B1+ groups, respectively. We performed  
29 analysis regarding collinearity diagnostics between morbidity during  $Y_{-3}$  -  $Y_{-1}$  and  $Y_{+1}$ , but  
30 found no strong indication for collinearity for these measures.  
31  
32  
33  
34  
35  
36  
37  
38  
39  
40  
41  
42  
43  
44  
45  
46  
47  
48  
49  
50  
51  
52  
53

54 All analyses were conducted by SAS Statistical Software, version 9.4.  
55  
56  
57  
58  
59

## 60 **Patient and public involvement**

1  
2  
3 The study participants or the general public were not involved in decisions about the research  
4 question, the design of the study, the outcomes, the conduct of the study, the drafting of the  
5 paper, nor in the dissemination of the study results.  
6  
7  
8  
9  
10

## 11 **RESULTS**

12  
13  
14  
15 Among the 492,504 women, 38,972 (7.9%) had at least one childbirth during the study period,  
16 i.e., were in the B1 or B1+ groups (Table 1). The majority of the women in B1 or B1+ were  
17 younger than 30 years and had a somewhat higher educational level than those in the B0  
18 group. Further characteristics of the three childbirth groups are presented in Table 1. A higher  
19 proportion of the women in B1 or B1+ had at least one SA spell before and/or after  $T_0$  than  
20 the B0 women. On the contrary, compared to women in B1 or B1+, a higher proportion of the  
21 B0 women had DP.  
22  
23  
24  
25  
26  
27  
28  
29  
30  
31  
32  
33  
34  
35  
36  
37  
38  
39  
40  
41  
42  
43  
44  
45  
46  
47  
48  
49  
50  
51  
52  
53  
54  
55  
56  
57  
58  
59  
60

**Table 1.** Characteristics of the cohort of women<sup>1</sup> by childbirth group (N=492,504)

| <b>Factors</b>                                    | <b>B0</b>      | <b>B1</b>     | <b>B1+</b>    | <b>p-value<sup>2</sup></b> |
|---------------------------------------------------|----------------|---------------|---------------|----------------------------|
|                                                   | (n=453,532)    | (n=14,299)    | (n=23,673)    |                            |
|                                                   | n (%)          | n (%)         | n (%)         |                            |
| <b>Age in 2004</b>                                |                |               |               | <0.001                     |
| 18-24                                             | 257,219 (56.7) | 3688 (25.8)   | 5284 (21.4)   |                            |
| 25-29                                             | 92,672 (20.4)  | 4593 (32.1)   | 10,354 (42.0) |                            |
| 30-34                                             | 56,233 (12.4)  | 4089 (28.6)   | 7614 (30.9)   |                            |
| 35-39                                             | 47,408 (10.5)  | 1929 (13.5)   | 1421 (5.8)    |                            |
| <b>Country of birth</b>                           |                |               |               | <0.001                     |
| Sweden                                            | 397,091 (87.6) | 12,388 (86.6) | 22,583 (91.5) |                            |
| Other Northern European                           | 4873 (1.1)     | 200 (1.4)     | 237 (1.0)     |                            |
| Other European countries                          | 7432 (1.6)     | 213 (1.5)     | 242 (1.0)     |                            |
| Rest of the world                                 | 44,136 (9.7)   | 1498 (10.5)   | 1611 (6.5)    |                            |
| <b>Type of living area in 2004</b>                |                |               |               | <0.001                     |
| Large cities                                      | 196,911 (43.4) | 6260 (43.8)   | 10,882 (44.1) |                            |
| Medium-sized cities                               | 161,919 (35.7) | 4824 (33.7)   | 8425 (34.2)   |                            |
| Small cities/rural                                | 94,702 (20.9)  | 3215 (22.5)   | 5366 (21.8)   |                            |
| <b>Educational attainment in 2004</b>             |                |               |               | <0.001                     |
| Elementary ( $\leq 9$ years)                      | 90,510 (20.0)  | 1815 (12.7)   | 1757 (7.1)    |                            |
| High school (10-12 years)                         | 208,184 (45.9) | 6751 (47.2)   | 9516 (38.6)   |                            |
| University/college ( $\geq 13$ years)             | 154,838 (34.1) | 5733 (40.1)   | 13,400 (54.3) |                            |
| <b>Family situation in 2004</b>                   |                |               |               | <0.001                     |
| Married or cohabitant                             | 20,295 (4.5)   | 3212 (22.5)   | 6843 (27.7)   |                            |
| Single                                            | 433,237 (95.5) | 11,087 (77.5) | 17,830 (72.3) |                            |
| <b>Hospitalisation (at least one day during):</b> |                |               |               |                            |



|                                                                  |                |               |               |        |
|------------------------------------------------------------------|----------------|---------------|---------------|--------|
| Y <sub>-3</sub> - Y <sub>-1</sub>                                | 50,184 (11.1)  | 8074 (56.5)   | 13,145 (53.3) | <0.001 |
| excluding ICD-10: O and Z30-                                     | 49,040 (10.8)  | 1726 (12.2)   | 2210 (9.0)    | <0.001 |
| Z39                                                              |                |               |               |        |
| Y <sub>+1</sub> - Y <sub>+3</sub>                                | 49,430 (10.9)  | 13,975 (97.7) | 24,547 (99.5) | <0.001 |
| excluding ICD-10: O and Z30-                                     | 47,892 (10.6)  | 1691 (11.8)   | 1924 (7.8)    | <0.001 |
| Z39                                                              |                |               |               |        |
| Y <sub>-3</sub> - Y <sub>+3</sub>                                | 14,865 (3.3)   | 7773 (54.4)   | 13,024 (52.8) | <0.001 |
| excluding ICD-10: O and Z30-                                     | 14,436 (3.2)   | 439 (3.1)     | 372 (1.5)     | <0.001 |
| Z39                                                              |                |               |               |        |
| <b>Specialised outpatient visit (at least one visit during):</b> |                |               |               |        |
| Y <sub>-3</sub> - Y <sub>-1</sub>                                | 256,677 (56.6) | 12,130 (84.8) | 19,916 (80.7) | <0.001 |
| excluding ICD-10: O and Z30-Z39                                  | 254,531 (56.1) | 10,286 (71.9) | 16,323 (66.2) | <0.001 |
| Y <sub>+1</sub> - Y <sub>+3</sub>                                | 264,932 (58.4) | 9870 (69.0)   | 19,625 (79.5) | <0.001 |
| excluding ICD-10: O and Z30-Z39                                  | 261,766 (57.7) | 9063 (63.4)   | 15,489 (62.8) | <0.001 |
| Y <sub>-3</sub> - Y <sub>+3</sub>                                | 180,667 (39.8) | 8737 (61.1)   | 16,520 (67.0) | <0.001 |
| excluding ICD-10: O and Z30-Z39                                  | 177,748 (39.2) | 7165 (50.1)   | 11,376 (46.1) | <0.001 |
| <b>At least one sickness absence spell during:</b>               |                |               |               |        |
| Y <sub>-3</sub> - Y <sub>-1</sub>                                | 54,013 (11.9)  | 5840 (40.8)   | 8802 (35.7)   | <0.001 |
| Y <sub>+1</sub> - Y <sub>+3</sub>                                | 61,341 (13.5)  | 2797 (19.6)   | 7447 (30.2)   | <0.001 |
| Y <sub>-3</sub> - Y <sub>+3</sub>                                | 90,849 (20.0)  | 6740 (47.1)   | 11,940 (48.4) | <0.001 |
| <b>Disability pension any time during:</b>                       |                |               |               |        |
| Y <sub>-3</sub> - Y <sub>-1</sub>                                | 21,289 (4.7)   | 351 (2.5)     | 208 (0.8)     | <0.001 |
| Y <sub>+1</sub> - Y <sub>+3</sub>                                | 27,453 (6.1)   | 438 (3.1)     | 238 (1.0)     | <0.001 |
| Y <sub>-3</sub> - Y <sub>+3</sub>                                | 28,121 (6.2)   | 467 (3.3)     | 256 (1.0)     | <0.001 |

<sup>1</sup>Nulliparous women aged 18-39 in December 2004 registered as residents in Sweden in 2002-2004.

1  
2  
3 <sup>2</sup>The p-value corresponds to chi-square tests in case of categorical variables and to Wilcoxon tests in case of  
4 continuous/count variables.  
5

6 B0=No childbirth in 2005 nor in the following three years + 43 weeks; B1=First child in 2005 and no more  
7 deliveries in the following three years + 43 weeks; B1+=First child in 2005 and at least one more delivery in the  
8 following three years + 43 weeks; Y<sub>-3</sub>=three years before delivery/index date; Y<sub>-1</sub>=one year before  
9 delivery/index date; Y<sub>+1</sub>=one year after delivery/index date; Y<sub>+3</sub>=three years after delivery/index date; T<sub>0</sub>=  
10 Delivery date, or in the B0 group: 2 July 2005.  
11  
12  
13  
14  
15  
16  
17  
18  
19  
20  
21  
22  
23  
24  
25  
26  
27  
28  
29  
30  
31  
32  
33  
34  
35  
36  
37  
38  
39  
40  
41  
42  
43  
44  
45  
46  
47  
48  
49  
50  
51  
52  
53  
54  
55  
56  
57  
58  
59  
60

For peer review only

1  
2  
3 The mean annual number of hospitalisation days and visits to specialised outpatient healthcare  
4 are presented in Figure 1. Figures 1c shows that when healthcare with diagnoses for  
5 pregnancy and childbirth are excluded, women in the B1 and B1+ groups had lower number  
6 of hospitalisation days than women in B0, particularly the women in B1+; outside the period  
7 of pregnancy, women in B1+ had a lower number of specialised outpatient visits than women  
8 in B0 (figure 1d).  
9

10  
11  
12 Women in B1 or B1+ had more SA days during the year before  $T_0$ , especially in the B1 group  
13 (Figure 2). After  $T_0$ , the number of SA days for these women dropped rapidly to a lower level  
14 than for women in B0, that is, in that year most women were on parental-leave benefits.  
15  
16 However, in all studied years, women in B0 had a higher mean number of DP days/year than  
17 women in B1 or B1+. Women in B1+ had the lowest mean number of DP days/year compared  
18 to both B0 and B1+.  
19

20  
21  
22 Table 2 presents crude and multivariate HR and 95% CI for the association between  
23 morbidity in  $Y_{+1}$  after  $T_0$  and future SA among all not on DP at  $T_0$ , for each of the three  
24 childbirth groups. Those on DP at  $T_0$  were excluded as they were not at risk of new DP or SA.  
25  
26 First all three groups (B0, B1, and B1+) were compared, then the two childbirth groups (B1  
27 and B1+) were compared. In the fully adjusted models, the HR of future SA was compared  
28 between the groups, using women in the B0 group with no such morbidity as reference group.  
29  
30 In the B0 group with such morbidity, the SA risk was approximately three-fold higher in  $Y_{+2}$ -  
31  $Y_{+3}$ . Actually, the women in B1, without morbidity in  $Y_{+1}$  had a lower risk of future SA  
32 compared to B0 women without such morbidity. Those in B1+, without morbidity at  $Y_{+1}$ , had  
33 a lower risk of long-term SA (>90 days) in  $Y_{+2}$ - $Y_{+3}$ , however, a higher risk for any SA.  
34  
35  
36  
37  
38  
39  
40  
41  
42  
43  
44  
45  
46  
47  
48  
49  
50  
51  
52  
53  
54  
55  
56  
57  
58  
59  
60

**Table 2.** Crude and adjusted hazard ratios and 95% confidence intervals for the association between childbirth, morbidity one year after T<sub>0</sub> and new sickness absence in the second and third year after T<sub>0</sub><sup>1</sup>

| Morbidity <sup>2</sup>                                  | SA in Y <sub>+2</sub> -Y <sub>+3</sub> (regardless of number of SA days) |                                          |                      |                      |                | Long-term SA (>90 days) in Y <sub>+2</sub> -Y <sub>+3</sub> |                      |                      |   |
|---------------------------------------------------------|--------------------------------------------------------------------------|------------------------------------------|----------------------|----------------------|----------------|-------------------------------------------------------------|----------------------|----------------------|---|
|                                                         | N/Outcome                                                                | Hazard ratios (95% confidence intervals) |                      |                      | N/Outcome      | Hazard ratios (95% confidence intervals)                    |                      |                      |   |
|                                                         |                                                                          | Crude                                    | Model 1 <sup>3</sup> | Model 2 <sup>4</sup> |                | Crude                                                       | Model 1 <sup>3</sup> | Model 2 <sup>4</sup> |   |
| <b>All women (n=470,656)</b>                            |                                                                          |                                          |                      |                      |                |                                                             |                      |                      |   |
| B0, no morbidity in Y <sub>+1</sub> <sup>5</sup>        | 417,592/39,911                                                           | 1                                        | 1                    | 1                    | 417,592/12,614 | 1                                                           | 1                    | 1                    | 1 |
| B0, morbidity in Y <sub>+1</sub> <sup>5</sup>           | 14,651/3891                                                              | 3.29 (3.18-3.40)                         | 3.24 (3.14-3.35)     | 2.56 (2.48-2.65)     | 14,651/1855    | 4.61 (4.39-4.84)                                            | 4.51 (4.30-4.74)     | 3.33 (3.16-3.50)     |   |
| B1, no morbidity in Y <sub>+1</sub> <sup>5</sup>        | 13,425/1837                                                              | 1.45 (1.38-1.52)                         | 1.14 (1.09-1.20)     | 0.81 (0.77-0.85)     | 13,425/590     | 1.46 (1.34-1.58)                                            | 1.05 (0.97-1.14)     | 0.68 (0.62-0.74)     |   |
| B1, morbidity in Y <sub>+1</sub> <sup>5</sup>           | 523/153                                                                  | 3.61 (3.08-4.23)                         | 2.89 (2.46-3.38)     | 1.87 (1.59-2.19)     | 523/81         | 5.66 (4.55-7.04)                                            | 4.21 (3.38-5.24)     | 2.43 (1.95-3.02)     |   |
| B1+, no morbidity in Y <sub>+1</sub> <sup>5</sup>       | 23,947/6451                                                              | 3.01 (2.93-3.09)                         | 2.50 (2.43-2.57)     | 1.82 (1.77-1.87)     | 23,947/1212    | 1.67 (1.58-1.78)                                            | 1.26 (1.18-1.34)     | 0.84 (0.79-0.89)     |   |
| B1+, morbidity in Y <sub>+1</sub> <sup>5</sup>          | 518/233                                                                  | 5.95 (5.23-6.77)                         | 5.01 (4.40-5.69)     | 3.32 (2.92-3.78)     | 518/67         | 4.48 (3.52-5.70)                                            | 3.41 (2.68-4.34)     | 2.03 (1.59-2.58)     |   |
| <b>Women who had at least one childbirth (n=38,413)</b> |                                                                          | §                                        |                      |                      |                |                                                             |                      |                      |   |
| B1, no morbidity in Y <sub>+1</sub> <sup>5</sup>        | 13,425/1837                                                              | 1                                        | 1                    | 1                    | 13,425/590     | 1                                                           | 1                    | 1                    |   |
| B1, morbidity in Y <sub>+1</sub> <sup>5</sup>           | 523/153                                                                  | 2.54 (2.15-3.00)                         | 2.52 (2.14-2.97)     | 2.38 (2.02-2.81)     | 523/81         | 3.93 (3.12-4.96)                                            | 3.85 (3.05-4.85)     | 3.55 (2.81-4.48)     |   |
| B1+, no morbidity in Y <sub>+1</sub> <sup>5</sup>       | 23,947/6451                                                              | 2.10 (2.00-2.22)                         | 2.17 (2.06-2.29)     | 2.20 (2.09-2.32)     | 23,947/1212    | 1.15 (1.04-1.27)                                            | 1.21 (1.09-1.33)     | 1.23 (1.11-1.36)     |   |
| B1+, morbidity in Y <sub>+1</sub> <sup>5</sup>          | 518/233                                                                  | 4.26 (3.72-4.89)                         | 4.44 (3.87-5.08)     | 4.23 (3.69-4.85)     | 518/67         | 3.10 (2.41-3.99)                                            | 3.21 (2.49-4.13)     | 2.99 (2.32-3.85)     |   |

1  
2  
3  $T_0$ = Delivery date or equivalent; SA=sickness absence;  $Y_{+2}$ =two years after delivery/index date;  $Y_{+3}$ =three years after delivery/index date; B0=No childbirth in 2005 nor in the  
4 following three years + 43 weeks; B1=First child in 2005 and no more deliveries in the following three years + 43 weeks;  $Y_{+1}$ =one year after delivery/index date; B1+=First  
5 child in 2005 and at least one more delivery in the following three years + 43 weeks.  
6  
7

8  
9 <sup>1</sup>Women on DP at baseline were excluded  
10

11 <sup>2</sup>Morbidity: measured by hospitalisation and specialised outpatient visit  
12

13 <sup>3</sup>Model 1: Adjusted for age, education, country of birth, and type of living area  
14

15 <sup>4</sup>Model 2: Adjusted for age, education, country of birth, type of living area, and previous hospitalisation and specialised outpatient visit  
16  
17

18 <sup>5</sup>Diagnoses O00-O99 and Z30-Z39 were excluded.  
19  
20  
21  
22  
23  
24  
25  
26  
27  
28  
29  
30  
31  
32  
33  
34  
35  
36  
37  
38  
39  
40  
41  
42  
43  
44  
45  
46

1  
2  
3 When restricting the analyses to those who had given birth, that is, to the women in B1 and  
4 B1+ (n=38,413), those in B1+ with morbidity in  $Y_{+1}$  had a particularly high risk of any SA  
5 compared to all other groups. When again excluding those on DP at  $T_0$ , the HR for future DP  
6 was highest in the B0 group with morbidity in  $Y_{+1}$ , using the women in B0 with no morbidity  
7 in  $Y_{+1}$  as reference group (Table 3). Regardless of morbidity, parous women, particularly  
8 those in B1+, had a lower risk of DP than women in B0. When restricting the analyses to only  
9 women in B1 and B1+, morbidity was associated with having DP in  $Y_{+2}$ - $Y_{+3}$ , especially in the  
10 B1 group. That is, those with more than one birth had lower risk of DP.  
11  
12  
13  
14  
15  
16  
17  
18  
19  
20  
21  
22  
23  
24  
25  
26  
27  
28  
29  
30  
31  
32  
33  
34  
35  
36  
37  
38  
39  
40  
41  
42  
43  
44  
45  
46  
47  
48  
49  
50  
51  
52  
53  
54  
55  
56  
57  
58  
59  
60

**Table 3.** Hazard ratios and 95% confidence intervals for the association between childbirth, morbidity one year after T<sub>0</sub> and new disability pension in the second and third year after T<sub>0</sub><sup>1</sup>

| Morbidity <sup>2</sup>                                  | N/Outcome    | Hazard ratios and 95% confidence intervals for DP in Y <sub>+2</sub> -Y <sub>+3</sub> |                      |                      |
|---------------------------------------------------------|--------------|---------------------------------------------------------------------------------------|----------------------|----------------------|
|                                                         |              | Crude                                                                                 | Model 1 <sup>3</sup> | Model 2 <sup>4</sup> |
| <b>All women (n=470,656)</b>                            |              |                                                                                       |                      |                      |
| B0, no morbidity in Y <sub>+1</sub> <sup>5</sup>        | 417,592/5374 | 1                                                                                     | 1                    | 1                    |
| B0, morbidity in Y <sub>+1</sub> <sup>5</sup>           | 14,651/1391  | 7.72 (7.28-8.19)                                                                      | 6.88 (6.48-7.30)     | 4.11 (3.87-4.37)     |
| B1, no morbidity in Y <sub>+1</sub> <sup>5</sup>        | 13,425/90    | 0.52 (0.42-0.64)                                                                      | 0.41 (0.33-0.50)     | 0.20 (0.16-0.24)     |
| B1, morbidity in Y <sub>+1</sub> <sup>5</sup>           | 523/25       | 3.77 (2.55-5.59)                                                                      | 2.82 (1.90-4.17)     | 1.17 (0.79-1.73)     |
| B1+, no morbidity in Y <sub>+1</sub> <sup>5</sup>       | 23,947/39    | 0.13 (0.09-0.17)                                                                      | 0.11 (0.08-0.16)     | 0.06 (0.04-0.08)     |
| B1+, morbidity in Y <sub>+1</sub> <sup>5</sup>          | 518/8        | 1.20 (0.60-2.40)                                                                      | 1.01 (0.50-2.01)     | 0.43 (0.21-0.85)     |
| <b>Women who had at least one childbirth (n=38,413)</b> |              |                                                                                       |                      |                      |
| B1, no morbidity in Y <sub>+1</sub> <sup>5</sup>        | 13,425/90    | 1                                                                                     | 1                    | 1                    |
| B1, morbidity in Y <sub>+1</sub> <sup>5</sup>           | 523/25       | 7.32 (4.70-11.40)                                                                     | 6.27 (4.02-9.79)     | 5.68 (3.63-8.87)     |
| B1+, no morbidity in Y <sub>+1</sub> <sup>5</sup>       | 23,947/39    | 0.24 (0.17-0.35)                                                                      | 0.28 (0.19-0.41)     | 0.28 (0.19-0.42)     |
| B1+, morbidity in Y <sub>+1</sub> <sup>5</sup>          | 518/8        | 2.32 (1.12-4.77)                                                                      | 2.30 (1.12-4.75)     | 2.07 (1.00-4.27)     |

<sup>1</sup>T<sub>0</sub>= Delivery date or among those in B0: 2 July 2005; DP=disability pension; Y<sub>+2</sub>=two years after delivery/index date; Y<sub>+3</sub>=three years after delivery/index date; B0=No childbirth in 2005 nor in the following three years +43 weeks; Y<sub>+1</sub>=one year after delivery/index date; B1=First child in 2005 and no more deliveries in the following three years + 43 weeks; B1+=First child in 2005 and at least one more delivery in the following three years + 43 weeks.

1  
2  
3 <sup>1</sup>Women on DP at baseline were excluded  
4

5 <sup>2</sup>Morbidity: measured by hospitalisation and specialised outpatient visit  
6

7 <sup>3</sup>Model 1: Adjusted for age, education, country of birth and type of living area  
8

9 <sup>4</sup>Model 2: Adjusted for age, education, country of birth, type of living area, and previous hospitalisation and specialised outpatient visit  
10

11 <sup>5</sup>Diagnoses O00-O99 and Z30-Z39 were excluded.  
12  
13  
14  
15  
16  
17  
18  
19  
20  
21  
22  
23  
24  
25  
26  
27  
28  
29  
30  
31  
32  
33  
34  
35  
36  
37  
38  
39  
40  
41  
42  
43  
44  
45  
46

For peer review only



1  
2  
3 When investigating the associations between the amount of morbidity (classified as no  
4 morbidity, morbidity before  $T_0$ , morbidity after  $T_0$ , and morbidity both before and after  $T_0$ ,  
5 respectively) and the risk of SA and DP in  $Y_{+2}$ - $Y_{+3}$  among women who gave birth, we found a  
6 gradient across these categories; there was a particularly high risk of future SA and DP among  
7 women with morbidity both before and after  $T_0$  (Tables 4 and 5).  
8  
9  
10  
11  
12  
13  
14  
15  
16  
17  
18  
19  
20  
21  
22  
23  
24  
25  
26  
27  
28  
29  
30  
31  
32  
33  
34  
35  
36  
37  
38  
39  
40  
41  
42  
43  
44  
45  
46  
47  
48  
49  
50  
51  
52  
53  
54  
55  
56  
57  
58  
59  
60

For peer review only

**Table 4.** Hazard ratios and 95% confidence intervals for the association between morbidity before and after the first birth and new sickness absence in the second and third year after  $T_0$  in women who had at least one childbirth (n=38,413)<sup>1</sup>

| Morbidity <sup>2</sup>                                                    | Hazard ratios and 95% confidence intervals                   |                  |                      |                                                 |                  |                      |
|---------------------------------------------------------------------------|--------------------------------------------------------------|------------------|----------------------|-------------------------------------------------|------------------|----------------------|
|                                                                           | SA in $Y_{+2}$ - $Y_{+3}$ (regardless of the number of days) |                  |                      | Long-term SA (> 90 days) in $Y_{+2}$ - $Y_{+3}$ |                  |                      |
|                                                                           | N/Outcome                                                    | Crude            | Model 1 <sup>3</sup> | N/Outcome                                       | Crude            | Model 1 <sup>3</sup> |
| No morbidity during $Y_{-3}$ - $Y_{-1}$ or $Y_{+1}$ <sup>4</sup>          | 19,531/3825                                                  | 1                | 1                    | 19,531/742                                      | 1                | 1                    |
| Morbidity during $Y_{-3}$ - $Y_{-1}$ but not during $Y_{+1}$ <sup>4</sup> | 17,841/4463                                                  | 1.33 (1.28-1.39) | 1.34 (1.28-1.40)     | 17,841/1060                                     | 1.59 (1.44-1.74) | 1.57 (1.42-1.72)     |
| No morbidity during $Y_{-3}$ - $Y_{-1}$ but during $Y_{+1}$ <sup>4</sup>  | 373/123                                                      | 1.95 (1.63-2.34) | 1.96 (1.64-2.35)     | 373/51                                          | 3.91 (2.94-5.19) | 3.84 (2.89-5.09)     |
| Morbidity both during $Y_{-3}$ - $Y_{-1}$ and $Y_{+1}$ <sup>4</sup>       | 668/263                                                      | 2.50 (2.21-2.83) | 2.57 (2.27-2.91)     | 668/97                                          | 4.19 (3.39-5.18) | 4.09 (3.31-5.06)     |

$T_0$ = Delivery date or equivalent; SA=sickness absence;  $Y_{+2}$ =two years after delivery;  $Y_{+3}$ =three years after delivery;  $Y_{-3}$ =three years before delivery;  $Y_{-1}$ =one year before delivery;  $Y_{+1}$ =one year after delivery.

<sup>1</sup>Women on DP at baseline were excluded

<sup>2</sup>Morbidity: measured by hospitalisation and specialised outpatient visit

<sup>3</sup>Model 1: Adjusted for age, education, country of birth, and type of living area

<sup>4</sup>Diagnoses O00-O99 and Z30-Z39 were excluded.

**Table 5.** Hazard ratios and 95% confidence intervals for the association between morbidity before and after the first birth and new disability pension in the second and third year after T<sub>0</sub> in women who had at least one childbirth (n=38,413) <sup>1</sup>

| Morbidity <sup>2</sup>                                                                        | N/Outcome | Hazard ratios and 95% confidence intervals for DP in Y <sub>+2</sub> -Y <sub>+3</sub> |                      |
|-----------------------------------------------------------------------------------------------|-----------|---------------------------------------------------------------------------------------|----------------------|
|                                                                                               |           | Crude                                                                                 | Model 1 <sup>3</sup> |
| No morbidity during Y <sub>-3</sub> -Y <sub>-1</sub> or Y <sub>+1</sub> <sup>4</sup>          | 19,531/41 | 1                                                                                     | 1                    |
| Morbidity during Y <sub>-3</sub> -Y <sub>-1</sub> but not during Y <sub>+1</sub> <sup>4</sup> | 17,841/88 | 2.35 (1.62-3.41)                                                                      | 2.13 (1.47-3.10)     |
| No morbidity during Y <sub>-3</sub> -Y <sub>-1</sub> but during Y <sub>+1</sub> <sup>4</sup>  | 373/9     | 11.70 (5.69-24.06)                                                                    | 9.90 (4.80-20.42)    |
| Morbidity both during Y <sub>-3</sub> -Y <sub>-1</sub> and Y <sub>+1</sub> <sup>4</sup>       | 668/24    | 17.45 (10.54-28.87)                                                                   | 13.20 (7.92-21.98)   |

T<sub>0</sub>=Delivery date or equivalent; DP=sickness absence; Y<sub>+2</sub>=two years after delivery/index date; Y<sub>+3</sub>=three years after delivery/index date; Y<sub>-3</sub>=three years before delivery/index date; Y<sub>-1</sub>=one year before delivery/index date; Y<sub>+1</sub>=one year after delivery/index date.

<sup>1</sup>Women on DP at baseline were excluded

<sup>2</sup>Model 1: Adjusted for age, education, country of birth, and type of living area

<sup>3</sup>Morbidity: measured by hospitalisation and specialised outpatient visit

<sup>4</sup>Diagnoses O00-O99 and Z30-Z39 excluded.

## DISCUSSION

In this longitudinal, population-based cohort study of 492,504 women in Sweden, we investigated the associations of morbidity (i.e., hospitalisation, specialised outpatient healthcare that is not related to pregnancy, childbirth, or postpartum) with future SA and DP in our three groups of initially nulliparous women, i.e., B0, B1, and B1+. During  $Y_{-1}$  parous women had higher mean number of SA days than women in B0. This decreased gradually during the years after  $T_0$ . On the other hand, over all the six studied years the women in the B0 group had a higher number of DP days than women in B1 and B1+. When excluding those on DP at  $T_0$ , we found that morbidity was strongly associated with a higher risk of future SA and DP, regardless of childbirth status. Analyses focusing solely on women who gave birth showed that morbidity both before and after the first childbirth was associated with a particularly high risk of future SA and DP.

Research has repeatedly shown that women have a higher probability of having SA or DP than men<sup>40 41</sup> and pregnancy/childbirth is considered to be one of the reasons behind this difference.<sup>6 7 28 42 43</sup> Our results that SA days increased in  $Y_{-1}$ , that is, during pregnancy, as well as that the number became much lower in  $Y_{+1}$  (when most are on parental leave) are in line with some previous studies.<sup>6 12 15 29 44 45</sup> The somewhat higher levels of SA in  $Y_{+3}$  could be explained by the double-burden hypothesis which suggests that the combination of paid work and parenthood may lead to worse health.<sup>46-49</sup> However, several other studies have suggested that multiple roles are likely to be beneficial to women's health.<sup>50-52</sup> A Norwegian study also reported a higher level of SA in the years after pregnancy, which disappeared after accounting for SA during subsequent pregnancies.<sup>49</sup> Moreover, women who remained nulliparous had higher levels of DP than those who gave birth. Our findings also showed higher mean number of hospitalisation days among nulliparous women, indicating that there might be a health selection into pregnancy.

1  
2  
3 Women with morbidity that was not related to pregnancy, childbirth, and the postpartum  
4 period after delivery, had an overall higher risk for future SA, regardless of childbirth status  
5 than the other women. This association persisted even after adjustment for age, education, and  
6 previous morbidity. Women in B1 had a lower risk of any SA and of long-term SA than those  
7 in B0 (>90 days), whereas women who had more than one birth had a higher risk of any SA  
8 but a lower risk of long-term SA in  $Y_{+2}$ - $Y_{+3}$ . It is likely that the new pregnancy(ies) during the  
9 follow-up time resulted in SA for women in the B1+ group. Our finding regarding an inverse  
10 association between the number of births and DP might indicate better health among the  
11 women in the B1+ group than in the other two groups. These findings are also in line with  
12 two Swedish prospective cohort studies of female twins.<sup>11 29</sup> Comparison of women who gave  
13 birth to one child only to those who gave birth to several children, showed similar graded  
14 associations between morbidity and future SA/DP as when we compared parous women with  
15 nulliparous women.

16  
17 It has often been questioned by mass media, employers, and policy makers whether the higher  
18 SA among women – and in particular among women with small children – is due to really  
19 being ill or whether they use SA as a means to ease their “double burden” arising from work  
20 and domestic duties.<sup>28</sup> Nevertheless, we found that morbidity both before and after delivery  
21 was the strongest risk factor for SA and DP among women who gave birth. We observed a  
22 graded association between morbidity and SA/DP; women with morbidity before *or* after their  
23 first childbirth had a higher risk of SA and DP than those without morbidity, whereas those  
24 with morbidity both before *and* after the first childbirth had even higher risks. This suggests  
25 the presence of a dose-response association between morbidity and higher future SA/DP risk.  
26 Also this is in line with our previous studies of Swedish twin sisters.<sup>11 29</sup> To the best of our  
27 knowledge, this is the first study to document associations between morbidity and SA/DP

1  
2  
3 among women of childbearing age in the general population, using data on both  
4  
5 hospitalisation and specialised outpatient healthcare as well as on number of childbirths.  
6  
7  
8  
9

### 10 11 **Strengths and limitations** 12

13  
14 Strengths of this study include the population-based longitudinal cohort design, that all  
15  
16 women fulfilling the inclusion criteria could be included (not only a sample), and the large  
17  
18 cohort allowing for sub-group analyses. Other strengths are the possibility to use extensive  
19  
20 microdata linked from several high-quality nationwide administrative registers,<sup>53-55</sup> instead of  
21  
22 self-reports that are limited by, e.g., recall bias and drop-outs. It was also an advantage that all  
23  
24 study participants could be followed from date of birth or equivalent, rather than by calendar  
25  
26 years. The universal coverage of the Swedish public SA/DP insurance system further reduces  
27  
28 selection bias and misclassification of the outcome. Another strength is that we could use also  
29  
30 the National Patient Register to identify the childbirths not registered in the Medical Birth  
31  
32 Register. Additionally, the high employment rates among women on the Swedish labour  
33  
34 market limits<sup>56</sup> bias due to health selection into paid work, i.e., if a very large proportion of  
35  
36 the population is in paid work, more persons with different type of morbidity are in paid  
37  
38 work.  
39  
40  
41  
42  
43  
44

45 There are, however, some limitations that should be mentioned. First, some immigrant women  
46  
47 might only have given birth before coming to Sweden; they would consequently be  
48  
49 inappropriately categorised as nulliparous. The Medical Birth Register has information on  
50  
51 whether the woman had previous births, also outside of Sweden, however, not the Patient  
52  
53 Register. To reduce such misclassification, we only included women who lived in Sweden for  
54  
55 at least three years prior to inclusion in the study. If there were any such misclassification it  
56  
57 probably led to underestimation of SA and DP in the B0 group and does thus not affect our  
58  
59  
60

1  
2  
3 conclusions. It is important to be aware of that we studied women who gave birth, irrespective  
4  
5 of if they lived with the child or lived with other children. For instance, the child might have  
6  
7 died or the women given it up for adoption – also, nulliparous women might live with  
8  
9 children they did not give birth to. Another aspect is that SA spells  $\leq 14$  days were not  
10  
11 included, something that can be seen both as a limitation and a strength. The SA spells  $\leq 14$   
12  
13 days only account for a limited number of all SA days and most of them are not verified by a  
14  
15 physician certificate.<sup>57</sup> Furthermore, since the Patient Register includes only information on  
16  
17 in-patient and specialised outpatient healthcare, we could not include in our definition of  
18  
19 morbidity information from primary healthcare.  
20  
21  
22  
23  
24  
25  
26  
27

## 28 **Conclusions**

29  
30 It has been questioned whether sickness absent women with children are actually ill or rather  
31  
32 ease their “double burden” through claiming SA.<sup>28</sup> In this study we found a strong association  
33  
34 between morbidity and both SA and DP among women of childbearing ages after controlling  
35  
36 for morbidity before baseline and for several demographic factors. It has also been suggested  
37  
38 that women with more children have more SA. We found the opposite; women with one birth  
39  
40 had a lower future SA and DP risk than those who did not give birth, while those who gave  
41  
42 birth more than once had the lowest risk of DP. Our findings may inform the debate in  
43  
44 welfare states concerning the presence of morbidity in women on SA, in particular among  
45  
46 women with young children.  
47  
48  
49  
50  
51  
52  
53

54 **Contributors** MW conducted the analyses, wrote the first draft and revised the paper; KL  
55  
56 contributed to writing, interpretation of the findings and revised the paper; PS and KA  
57  
58 contributed to the conception and design of the study, interpretation of the findings and  
59  
60

1  
2  
3 revised the paper; LN contribute to the interpretation of the findings, writing and revised the  
4  
5 paper. All authors have read and approved the final version of the manuscript.  
6  
7

8 **Funding** This work was financially supported by AFA Insurance (grant number 160318). The  
9  
10 funder was not involved in the study design, collection or analysis of the data, interpretation  
11  
12 of the results, writing of the paper nor in decisions about the manuscript submission.  
13  
14

15  
16 **Competing interests** None declared.  
17

18  
19 **Patient consent for publication** Not applicable.  
20

21  
22 **Ethics approval** The project was approved by the Regional Ethical Review Board of  
23  
24 Stockholm.  
25

26  
27 **Data sharing statement** No additional data available.  
28  
29  
30  
31  
32  
33  
34  
35  
36  
37  
38  
39  
40  
41  
42  
43  
44  
45  
46  
47  
48  
49  
50  
51  
52  
53  
54  
55  
56  
57  
58  
59  
60



**FIGURE LEGENDS**

Figure 1. Mean annual number of hospitalization days and specialized outpatient visits (with 95% confidence intervals).

Figure 2. Mean annual number of days on sickness absence and/or disability pension (with 95% confidence intervals)

For peer review only

**REFERENCES**

1. Alexanderson K, Norlund A. Swedish Council on Technology Assessment in Health Care (SBU). Chapter 1. Aim, background, key concepts, regulations, and current statistics. *Scandinavian Journal of Public Health* 2004;32(Supplement 63):12-30.
2. Parrukoski S, LammiTaskula J. Parental leave policies and the economic crisis in the Nordic countries. Helsinki: National Institute for Health and Welfare, 2012.
3. Svedberg P, Ropponen A, Alexanderson K, et al. Genetic susceptibility to sickness absence is similar among women and men: findings from a Swedish twin cohort. *Twin research and human genetics : the official journal of the International Society for Twin Studies* 2012;15(5):642-8. doi: 10.1017/thg.2012.47 [published Online First: 2012/08/31]
4. Ugreninov E. Can Family Policy Reduce Mothers' Sick Leave Absence? A Causal Analysis of the Norwegian Paternity Leave Reform. *Journal of Family and Economic Issues* 2013;34(4):435-46. doi: 10.1007/s10834-012-9344-x
5. Mastekaasa A. Parenthood, gender and sickness absence. *Soc Sci Med* 2000;50(12):1827-42. [published Online First: 2000/05/08]
6. Alexanderson K, Hensing G, Carstensen J, et al. Pregnancy-related sickness absence among employed women in a Swedish county. *Scandinavian journal of work, environment & health* 1995;21(3):191-8. [published Online First: 1995/06/01]
7. Alexanderson K, Hensing G, Leijon M, et al. Pregnancy related sickness absence in a Swedish county, 1985-87. *Journal of epidemiology and community health* 1994;48(5):464-70. [published Online First: 1994/10/01]
8. Alexanderson K, Sydsjo A, Hensing G, et al. Impact of pregnancy on gender differences in sickness absence. *Scand J Soc Med* 1996;24(3):169-76. [published Online First: 1996/09/01]

- 1  
2  
3 9. Vistnes JP. Gender differences in days lost from work due to illness. *Ind Labor Relat Rev*  
4  
5 1997;50(2):304-23.  
6  
7  
8 10. Angelov N, Johansson, P. & Lindahl, E. Gender differences in sickness absence and the  
9  
10 gender division of family responsibilities. Uppsala: Institute for Evaluation of Labour  
11  
12 market and Education Policy (IFAU), 2013.  
13  
14  
15 11. Björkenstam E, Alexanderson K, Narusyte J, et al. Childbirth, hospitalisation and sickness  
16  
17 absence: a study of female twins. *BMJ Open* 2015;5(1):e006033. doi:  
18  
19 10.1136/bmjopen-2014-006033  
20  
21  
22 12. Narusyte J, Björkenstam E, Alexanderson K, et al. Occurrence of sickness absence and  
23  
24 disability pension in relation to childbirth: A 16-year follow-up study of 6323 Swedish  
25  
26 twins. *Scand J Public Health* 2016;44(1):98-105. doi: 10.1177/1403494815610051  
27  
28  
29 13. Marshall k RE, Telle K. Sick leave before, during and after pregnancy: Statistics Norway,  
30  
31 2012.  
32  
33 14. Floderus B, Hagman M, Aronsson G, et al. Medically certified sickness absence with  
34  
35 insurance benefits in women with and without children. *European journal of public*  
36  
37 *health* 2012;22:85-92.  
38  
39  
40 15. László K, Björkenstam C, Svedberg P, et al. Sickness absence and disability pension  
41  
42 before and after first childbirth and in nulliparous women by numerical gender-  
43  
44 segregation of occupations: a Swedish population-based longitudinal cohort study.  
45  
46 *PloS one* 2019;14(12):e0226198.  
47  
48  
49 16. Björkenstam C, László K, Orellana C, et al. Sickness absence and disability pension in  
50  
51 relation to first childbirth and in nulliparous women according to occupational groups:  
52  
53 A cohort study of 492,504 women in Sweden. *BMC public health* 2020;20(1):686.  
54  
55  
56  
57  
58  
59  
60

- 1  
2  
3 17. Soma-Pillay P, Nelson-Piercy C, Tolppanen H, et al. Physiological changes in pregnancy.  
4  
5 *Cardiovasc J Afr* 2016;27(2):89-94. doi: 10.5830/CVJA-2016-021 [published Online  
6  
7 First: 2016/05/24]  
8  
9
- 10 18. Williams D. Pregnancy: a stress test for life. *Curr Opin Obstet Gynecol* 2003;15(6):465-  
11  
12 71. doi: 10.1097/01.gco.0000103846.69273.ba [published Online First: 2003/11/19]  
13  
14
- 15 19. Piccinni MP, Lombardelli L, Logiodice F, et al. How pregnancy can affect autoimmune  
16  
17 diseases progression? *Clinical and molecular allergy : CMA* 2016;14:11. doi:  
18  
19 10.1186/s12948-016-0048-x [published Online First: 2016/09/22]  
20  
21
- 22 20. Khatun M, Clavarino AM, Callaway L, et al. Common symptoms during pregnancy to  
23  
24 predict depression and health status 14 years post partum. *International journal of*  
25  
26 *gynaecology and obstetrics: the official organ of the International Federation of*  
27  
28 *Gynaecology and Obstetrics* 2009;104(3):214-7. doi: 10.1016/j.ijgo.2008.10.019  
29  
30 [published Online First: 2008/11/28]  
31  
32
- 33 21. Brown MC, Best KE, Pearce MS, et al. Cardiovascular disease risk in women with pre-  
34  
35 eclampsia: systematic review and meta-analysis. *European journal of epidemiology*  
36  
37 2013;28(1):1-19. doi: 10.1007/s10654-013-9762-6 [published Online First:  
38  
39 2013/02/12]  
40  
41
- 42 22. Mannisto T, Mendola P, Vaarasmaki M, et al. Elevated blood pressure in pregnancy and  
43  
44 subsequent chronic disease risk. *Circulation* 2013;127(6):681-90. doi:  
45  
46 10.1161/circulationaha.112.128751 [published Online First: 2013/02/13]  
47  
48
- 49 23. Miller J, Kane Low L, Zielinski R, et al. Evaluating maternal recovery from labor and  
50  
51 delivery: bone and levator ani injuries. *American Journal of Obstetrics and*  
52  
53 *Gynecology* 2015;213(2):188.e1-88.e11.  
54  
55  
56  
57  
58  
59  
60

- 1  
2  
3 24. Sedgh G, Singh S, Hussain R. Intended and unintended pregnancies worldwide in 2012  
4  
5 and recent trends. *Studies in family planning* 2014;45(3):301-14. doi: 10.1111/j.1728-  
6  
7 4465.2014.00393.x [published Online First: 2014/09/11]  
8  
9
- 10 25. Cheng CY, Li Q. Integrative review of research on general health status and prevalence of  
11  
12 common physical health conditions of women after childbirth. *Women's health issues :*  
13  
14 *official publication of the Jacobs Institute of Women's Health* 2008;18(4):267-80. doi:  
15  
16 10.1016/j.whi.2008.02.004 [published Online First: 2008/05/13]  
17  
18
- 19 26. Saurel-Cubizolles MJ, Romito P, Lelong N, et al. Women's health after childbirth: a  
20  
21 longitudinal study in France and Italy. *BJOG : an international journal of obstetrics*  
22  
23 *and gynaecology* 2000;107(10):1202-9. [published Online First: 2000/10/12]  
24  
25
- 26 27. Troy NW. A comparison of fatigue and energy levels at 6 weeks and 14 to 19 months  
27  
28 postpartum. *Clinical nursing research* 1999;8(2):135-52. doi:  
29  
30 10.1177/10547739922158205 [published Online First: 2000/07/11]  
31  
32
- 33 28. Angelov N, Johansson, P. & Lindahl, E. . Sick of family responsibilities? *Empirical*  
34  
35 *Economics* 2018 doi: doi:10.1007/s00181-018-1552-2  
36  
37
- 38 29. Björkenstam E, Narusyte J, Alexanderson K, et al. Associations between childbirth,  
39  
40 hospitalization and disability pension: a cohort study of female twins. *PLoS One*  
41  
42 2014;9(7):e101566. doi: 10.1371/journal.pone.0101566  
43  
44
- 45 30. Alexanderson K, Norlund A. Swedish Council on Technology Assessment in Health Care  
46  
47 (SBU). Chapter 1. Aim, background, key concepts, regulations, and current statistics.  
48  
49 *Scandinavian journal of public health Supplement* 2004;63:12-30. doi:  
50  
51 10.1080/14034950410021808 [published Online First: 2004/10/30]  
52  
53
- 54 31. Allebeck P, Mastekaasa A. Swedish Council on Technology Assessment in Health Care  
55  
56 (SBU). Chapter 3. Causes of sickness absence: research approaches and explanatory  
57  
58  
59  
60

- 1  
2  
3 models. *Scandinavian journal of public health Supplement* 2004;63:36-43. doi:  
4  
5 10.1080/14034950410021835 [published Online First: 2004/10/30]  
6  
7  
8 32. Englund L, Tibblin G, Svardsudd K. Variations in sick-listing practice among male and  
9  
10 female physicians of different specialities based on case vignettes. *Scandinavian*  
11  
12 *journal of primary health care* 2000;18(1):48-52. [published Online First: 2000/05/16]  
13  
14  
15 33. Sydsjo A, Sydsjo G, Kjessler B. Sick leave and social benefits during pregnancy--a  
16  
17 Swedish-Norwegian comparison. *Acta Obstet Gynecol Scand* 1997;76(8):748-54.  
18  
19 34. Sydsjo G, Sydsjo A. Newly delivered women's evaluation of personal health status and  
20  
21 attitudes towards sickness absence and social benefits. *Acta Obstet Gynecol Scand*  
22  
23 2002;81(2):104-11.  
24  
25  
26 35. Larsson C, Sydsjo A, Alexanderson K, et al. Obstetricians' attitudes and opinions on  
27  
28 sickness absence and benefits during pregnancy. *Acta Obstet Gynecol Scand*  
29  
30 2006;85(2):165-70.  
31  
32  
33 36. Ludvigsson JF, Otterblad-Olausson P, Pettersson BU, et al. The Swedish personal identity  
34  
35 number: possibilities and pitfalls in healthcare and medical research. *European*  
36  
37 *journal of epidemiology* 2009;24(11):659-67. doi: 10.1007/s10654-009-9350-y  
38  
39  
40 37. Ludvigsson JF, Svedberg P, Olen O, et al. The longitudinal integrated database for health  
41  
42 insurance and labour market studies (LISA) and its use in medical research. *European*  
43  
44 *journal of epidemiology* 2019;34(4):423-37. doi: 10.1007/s10654-019-00511-8  
45  
46 [published Online First: 2019/04/01]  
47  
48  
49 38. WHO. International Statistical Classification of Diseases and Related Health Problems,  
50  
51 Tenth Revision (ICD-10). Chapter V (F). Geneva: WHO 1993.  
52  
53  
54 39. Social insurance in figures, 2016. Stockholm, the Swedish Social Insurance Agency,  
55  
56 2016.  
57  
58  
59  
60

- 1  
2  
3 40. Leinonen T, Viikari-Juntura E, Husgafvel-Pursiainen K, et al. Labour Market Segregation  
4  
5 and Gender Differences in Sickness Absence: Trends in 2005-2013 in Finland. *Annals*  
6  
7 *of work exposures and health* 2018;62(4):438-49. doi: 10.1093/annweh/wxx107  
8  
9 [published Online First: 2018/01/05]  
10  
11  
12 41. Allebeck P, Mastekaasa A. Swedish Council on Technology Assessment in Health Care  
13  
14 (SBU). Chapter 5. Risk factors for sick leave - general studies. (Systematic review).  
15  
16 *Scandinavian journal of public health Supplement* 2004(63):49-108.  
17  
18  
19 42. Alexanderson K, Sydsjo A, Hensing G, et al. Impact of pregnancy on gender differences  
20  
21 in sickness absence. *Scandinavian journal of social medicine* 1996;24(3):169-76.  
22  
23  
24 43. Åkerlind I, Alexanderson A, Hensing G, et al. Sex Differences in Sickness Absence, in  
25  
26 relation to Parental Status. *Scandinavian journal of social medicine* 1995;4(1):27-35.  
27  
28  
29 44. Sydsjo A, Sydsjo G, Alexanderson K. Influence of pregnancy-related diagnoses on sick-  
30  
31 leave data in women aged 16-44. *Journal of women's health & gender-based medicine*  
32  
33 2001;10(7):707-14. doi: 10.1089/15246090152563597 [published Online First:  
34  
35 2001/09/26]  
36  
37  
38 45. Bjorkenstam C, Orellana C, Laszlo KD, et al. Sickness absence and disability pension  
39  
40 before and after first childbirth and in nulliparous women: longitudinal analyses of  
41  
42 three cohorts in Sweden. *BMJ Open* 2019;9(9):e031593. doi: 10.1136/bmjopen-2019-  
43  
44 031593 [published Online First: 2019/09/11]  
45  
46  
47 46. Lidwall U, Marklund S, Voss M. Work-family interference and long-term sickness  
48  
49 absence: a longitudinal cohort study. *European journal of public health*  
50  
51 2010;20(6):676-81. doi: 10.1093/eurpub/ckp201 [published Online First: 2009/12/17]  
52  
53  
54 47. Vaananen A, Kevin MV, Ala-Mursula L, et al. The double burden of and negative  
55  
56 spillover between paid and domestic work: associations with health among men and  
57  
58 women. *Women & health* 2004;40(3):1-18. [published Online First: 2005/04/15]  
59  
60

- 1  
2  
3 48. Blank N, Diderichsen F. Short-term and long-term sick-leave in Sweden: relationships  
4  
5 with social circumstances, working conditions and gender. *Scandinavian journal of*  
6  
7 *social medicine* 1995;23(4):265-72. [published Online First: 1995/12/01]  
8  
9
- 10 49. Rieck K, Telle K. Sick leave before, during and after pregnancy. . *Acta Sociologica*  
11  
12 2013;56:117-37.  
13
- 14 50. McMunn A, Bartley M, Hardy R, et al. Life course social roles and women's health in  
15  
16 mid-life: causation or selection? *Journal of epidemiology and community health*  
17  
18 2006;60(6):484-9. doi: 10.1136/jech.2005.042473 [published Online First:  
19  
20 2006/05/16]  
21  
22
- 23 51. Lahelma E, Arber S, Kivela K, et al. Multiple roles and health among British and Finnish  
24  
25 women: the influence of socioeconomic circumstances. *Social science & medicine*  
26  
27 (1982) 2002;54(5):727-40. [published Online First: 2002/05/10]  
28  
29
- 30 52. Fokkema T. Combining a job and children: contrasting the health of married and divorced  
31  
32 women in the Netherlands? *Social science & medicine (1982)* 2002;54(5):741-52.  
33  
34 [published Online First: 2002/05/10]  
35  
36
- 37 53. Ludvigsson JF, Andersson E, Ekblom A, et al. External review and validation of the  
38  
39 Swedish national inpatient register. *BMC Public Health* 2011;11:450. doi:  
40  
41 10.1186/1471-2458-11-450 [published Online First: 2011/06/11]  
42  
43
- 44 54. Cnattingius S, Ericson A, Gunnarskog J, et al. A quality study of a medical birth registry.  
45  
46 *Scandinavian journal of social medicine* 1990;18(2):143-8. [published Online First:  
47  
48 1990/06/01]  
49  
50
- 51 55. Ludvigsson JF, Almqvist C, Bonamy AK, et al. Registers of the Swedish total population  
52  
53 and their use in medical research. *European journal of epidemiology* 2016;31(2):125-  
54  
55 36. doi: 10.1007/s10654-016-0117-y [published Online First: 2016/01/16]  
56  
57
- 58 56. Labour Force Surveys: Fourth Quarter 2017. Statistics Sweden, Stockholm, 2017.  
59  
60



1  
2  
3 57. Hensing G, Alexanderson K, Allebeck P, et al. How to measure sickness absence?  
4

5 Literature review and suggestion of five basic measures. *Scand J Soc Med*  
6

7 1998;26(2):133-44. [published Online First: 1998/07/11]  
8  
9  
10  
11  
12  
13  
14  
15  
16  
17  
18  
19  
20  
21  
22  
23  
24  
25  
26  
27  
28  
29  
30  
31  
32  
33  
34  
35  
36  
37  
38  
39  
40  
41  
42  
43  
44  
45  
46  
47  
48  
49  
50  
51  
52  
53  
54  
55  
56  
57  
58  
59  
60

For peer review only

1 a) Average annual number of days with hospitalisation



1 b) Mean annual number of specialised outpatient visits



17 1 c) Mean annual number of days with hospitalisation (excluding hospitalisations with a diagnosis for pregnancy, childbirth and the puerperium)

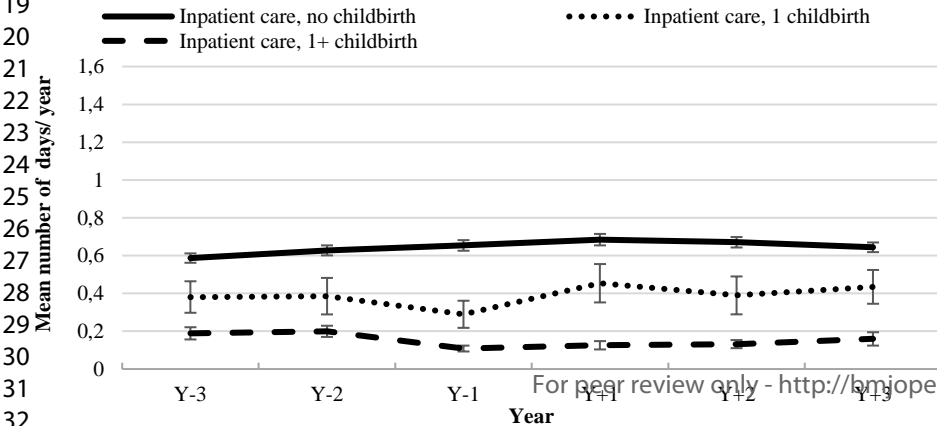

18 1 d) Mean annual number of specialised outpatient visits (excluding visits with a diagnosis for pregnancy, childbirth and the puerperium)



2 a) Mean annual net number of days on sickness absence (SA)



2 b) Mean annual net number of days on disability pension (DP)



STROBE Statement—Checklist of items that should be included in reports of *cohort studies*

|                              | Item No | Recommendation                                                                                                                                                                                    | Page                       |
|------------------------------|---------|---------------------------------------------------------------------------------------------------------------------------------------------------------------------------------------------------|----------------------------|
| <b>Title and abstract</b>    | 1       | (a) Indicate the study's design with a commonly used term in the title or the abstract                                                                                                            | p. 1, 2                    |
|                              |         | (b) Provide in the abstract an informative and balanced summary of what was done and what was found                                                                                               | p. 2                       |
| <b>Introduction</b>          |         |                                                                                                                                                                                                   |                            |
| Background/rationale         | 2       | Explain the scientific background and rationale for the investigation being reported                                                                                                              | p. 5-6                     |
| Objectives                   | 3       | State specific objectives, including any prespecified hypotheses                                                                                                                                  | p. 6                       |
| <b>Methods</b>               |         |                                                                                                                                                                                                   |                            |
| Study design                 | 4       | Present key elements of study design early in the paper                                                                                                                                           | p. 6-7                     |
| Setting                      | 5       | Describe the setting, locations, and relevant dates, including periods of recruitment, exposure, follow-up, and data collection                                                                   | p. 6-10                    |
| Participants                 | 6       | (a) Give the eligibility criteria, and the sources and methods of selection of participants. Describe methods of follow-up                                                                        | p. 6-10                    |
|                              |         | (b) For matched studies, give matching criteria and number of exposed and unexposed                                                                                                               | -                          |
| Variables                    | 7       | Clearly define all outcomes, exposures, predictors, potential confounders, and effect modifiers. Give diagnostic criteria, if applicable                                                          | p. 7-10                    |
| Data sources/<br>measurement | 8*      | For each variable of interest, give sources of data and details of methods of assessment (measurement). Describe comparability of assessment methods if there is more than one group              | p. 6-10                    |
| Bias                         | 9       | Describe any efforts to address potential sources of bias                                                                                                                                         | p. 11                      |
| Study size                   | 10      | Explain how the study size was arrived at                                                                                                                                                         | p. 7-8, 13-14              |
| Quantitative variables       | 11      | Explain how quantitative variables were handled in the analyses. If applicable, describe which groupings were chosen and why                                                                      | p. 7-10, 13-14             |
| Statistical methods          | 12      | (a) Describe all statistical methods, including those used to control for confounding                                                                                                             | p. 10-11                   |
|                              |         | (b) Describe any methods used to examine subgroups and interactions                                                                                                                               | p. 11                      |
|                              |         | (c) Explain how missing data were addressed                                                                                                                                                       | -                          |
|                              |         | (d) If applicable, explain how loss to follow-up was addressed                                                                                                                                    | p. 11                      |
|                              |         | (e) Describe any sensitivity analyses                                                                                                                                                             | p. 11                      |
| <b>Results</b>               |         |                                                                                                                                                                                                   |                            |
| Participants                 | 13*     | (a) Report numbers of individuals at each stage of study—eg numbers potentially eligible, examined for eligibility, confirmed eligible, included in the study, completing follow-up, and analysed | p. 7-8, 13-14              |
|                              |         | (b) Give reasons for non-participation at each stage                                                                                                                                              | p. 7-8, 13-14              |
|                              |         | (c) Consider use of a flow diagram                                                                                                                                                                | -                          |
| Descriptive data             | 14*     | (a) Give characteristics of study participants (eg demographic, clinical, social) and information on exposures and potential confounders                                                          | p. 13-14                   |
|                              |         | (b) Indicate number of participants with missing data for each variable of interest                                                                                                               | p. 13-14                   |
|                              |         | (c) Summarise follow-up time (eg, average and total amount)                                                                                                                                       | -                          |
| Outcome data                 | 15*     | Report numbers of outcome events or summary measures over time                                                                                                                                    | Tables 2-5,<br>Figures 1-2 |
| Main results                 | 16      | (a) Give unadjusted estimates and, if applicable, confounder-adjusted                                                                                                                             | Tables 2-5,                |

|                          |    |                                                                                                                                                                            |             |
|--------------------------|----|----------------------------------------------------------------------------------------------------------------------------------------------------------------------------|-------------|
|                          |    | estimates and their precision (eg, 95% confidence interval). Make clear which confounders were adjusted for and why they were included                                     | Figures 1-2 |
|                          |    | (b) Report category boundaries when continuous variables were categorized                                                                                                  | p. 12-13    |
|                          |    | (c) If relevant, consider translating estimates of relative risk into absolute risk for a meaningful time period                                                           | -           |
| Other analyses           | 17 | Report other analyses done—eg analyses of subgroups and interactions, and sensitivity analyses                                                                             | p. 22-24    |
| <b>Discussion</b>        |    |                                                                                                                                                                            |             |
| Key results              | 18 | Summarise key results with reference to study objectives                                                                                                                   | p. 25       |
| Limitations              | 19 | Discuss limitations of the study, taking into account sources of potential bias or imprecision. Discuss both direction and magnitude of any potential bias                 | p. 27, 28   |
| Interpretation           | 20 | Give a cautious overall interpretation of results considering objectives, limitations, multiplicity of analyses, results from similar studies, and other relevant evidence | p. 25-28    |
| Generalisability         | 21 | Discuss the generalisability (external validity) of the study results                                                                                                      | p. 27, 28   |
| <b>Other information</b> |    |                                                                                                                                                                            |             |
| Funding                  | 22 | Give the source of funding and the role of the funders for the present study and, if applicable, for the original study on which the present article is based              | p. 29       |

\*Give information separately for exposed and unexposed groups.

**Note:** An Explanation and Elaboration article discusses each checklist item and gives methodological background and published examples of transparent reporting. The STROBE checklist is best used in conjunction with this article (freely available on the Web sites of PLoS Medicine at <http://www.plosmedicine.org/>, Annals of Internal Medicine at <http://www.annals.org/>, and Epidemiology at <http://www.epidem.com/>). Information on the STROBE Initiative is available at <http://www.strobe-statement.org>.
